# Supplementary material for: Diverse modifications of the 4-methylphenyl moiety of TAK-779 by late-stage Suzuki–Miyaura cross-coupling
Source: Royal Society of Chemistry journal article supplement (doi:10.1039/c3ob41873a), 2013-10-28
Supplement: c3ob41873a.pdf [file c3ob41873a.pdf]

## Supplementary Material

### Diverse Modification of the 4-Methylphenyl Moiety of TAK-779 by Late-Stage Suzuki-Miyaura Cross-Coupling

Anna Junker,<sup>a</sup> Dirk Schepmann,<sup>a</sup> Junichiro Yamaguchi,<sup>b</sup> Kenichiro Itami,<sup>b,c</sup> Andreas Faust,<sup>d</sup>  
Klaus Kopka,<sup>e</sup> Stefan Wagner,<sup>f</sup> Bernhard Wünsch<sup>\*a</sup>

<sup>a</sup> *Institut für Pharmazeutische und Medizinische Chemie der Universität Münster, Corrensstr. 48, D-48149 Münster, Germany*

*Tel.: +49-251-8333311; Fax: +49-251-8332144; E-mail: wuensch@uni-muenster.de*

<sup>b</sup> *Department of Chemistry, Graduate School of Science, Nagoya University, Chikusa-ku, Nagoya, 464-8602 Japan*

<sup>c</sup> *Institute of Transformative Bio-Molecules (WPI-ITbM), Nagoya University, Chikusa-ku, Nagoya 464-8602 (Japan)*

*Tel/Fax: +81-52-788-6098; E-mail: itami.kenichiro@a.mbox.nagoya-u.ac.jp*

<sup>d</sup> *European Institute for Molecular Imaging (EIMI), Mendelstr. 11, D-48149 Münster, Germany*

<sup>e</sup> *Radiopharmaceutical Chemistry, German Cancer Research Center (dkfz), Im Neuenheimer Feld 280, D-69120 Heidelberg, Germany.*

*Tel: +49 6221 42 2432; E-Mail: k.kopka@dkfz.de*

<sup>f</sup> *Klinik für Nuklearmedizin, Albert-Schweitzer-Campus 1, Gebäude A1, D-48149 Münster, Germany*

## Content

<sup>1</sup>H and <sup>13</sup>C and gHSQC NMR spectra, HPLC analysis, MS spectra of all compounds.

|                                                                                                                                 | page |
|---------------------------------------------------------------------------------------------------------------------------------|------|
| <i>5-(4-Bromophenyl)-5-oxo-pentanoic acid (4)</i>                                                                               |      |
| <sup>1</sup> H spectrum                                                                                                         | 5    |
| HPLC chromatogram                                                                                                               | 6    |
| Exact MS spectra                                                                                                                | 7    |
| <i>5-(4-Bromophenyl) pentanoic acid (5)</i>                                                                                     |      |
| <sup>1</sup> H spectrum                                                                                                         | 9    |
| HPLC chromatogram                                                                                                               | 10   |
| Exact MS spectra                                                                                                                | 11   |
| <i>3-Bromo-6,7,8,9-tetrahydrobenzo[7]annulen-5-one (6)</i>                                                                      |      |
| <sup>1</sup> H spectrum                                                                                                         | 13   |
| HPLC chromatogram                                                                                                               | 14   |
| Exact MS spectra                                                                                                                | 15   |
| <i>Methyl 2-bromo-6,7-dihydro-5H-benzo[7]annulene-8-carboxylate (9)</i>                                                         |      |
| <sup>1</sup> H spectrum                                                                                                         | 17   |
| HPLC chromatogram                                                                                                               | 18   |
| Exact MS spectra                                                                                                                | 19   |
| <i>2-Bromo-6,7-dihydro-5H-benzo[7]annulene-8-carboxylic acid (10)</i>                                                           |      |
| <sup>1</sup> H spectrum                                                                                                         | 21   |
| HPLC chromatogram                                                                                                               | 22   |
| Exact MS spectra                                                                                                                | 23   |
| <i>2-Bromo-N-{4-[N-methyl-N-(tetrahydro-2H-pyran-4-yl)aminomethyl]phenyl}-6,7-dihydro-5H-benzo[7]annulene-8-carboxamide (3)</i> |      |
| <sup>1</sup> H spectrum                                                                                                         | 25   |
| <sup>13</sup> C spectrum                                                                                                        | 25   |
| gHSQC spectrum                                                                                                                  | 26   |
| HPLC chromatogram                                                                                                               | 27   |
| Exact MS spectra                                                                                                                | 28   |

|                                                                                                                                                  |    |
|--------------------------------------------------------------------------------------------------------------------------------------------------|----|
| <i>2-(4-Methoxyphenyl)-N-{4-[N-methyl-N-(tetrahydro-2H-pyran-4-yl)aminomethyl]phenyl}-6,7-dihydro-5H-benzo[7]annulene-8-carboxamide (2a)</i>     |    |
| <sup>1</sup> H spectrum                                                                                                                          | 30 |
| <sup>13</sup> C spectrum                                                                                                                         | 30 |
| HPLC chromatogram                                                                                                                                | 31 |
| Exact MS spectra                                                                                                                                 | 32 |
| <i>2-(4-Hydroxyphenyl)-N-{4-[N-methyl-N-(tetrahydro-2H-pyran-4-yl)aminomethyl]phenyl}-6,7-dihydro-5H-benzo[7]annulene-8-carboxamide (2b)</i>     |    |
| <sup>1</sup> H spectrum                                                                                                                          | 34 |
| <sup>13</sup> C spectrum                                                                                                                         | 34 |
| gHSQC spectrum                                                                                                                                   | 35 |
| HPLC chromatogram                                                                                                                                | 36 |
| Exact MS spectra                                                                                                                                 | 37 |
| <i>2-(4-Formylphenyl)-N-{4-[N-methyl-N-(tetrahydro-2H-pyran-4-yl)aminomethyl]phenyl}-6,7-dihydro-5H-benzo[7]annulene-8-carboxamide (2c)</i>      |    |
| <sup>1</sup> H spectrum                                                                                                                          | 39 |
| <sup>13</sup> C spectrum                                                                                                                         | 39 |
| gHSQC spectrum                                                                                                                                   | 40 |
| HPLC chromatogram                                                                                                                                | 41 |
| Exact MS spectra                                                                                                                                 | 42 |
| <i>Methyl 4-[8-(N-{4-[N-methyl-N-(tetrahydro-2H-pyran-4-yl)aminomethyl]phenyl}carbonyl)-6,7-dihydro-5H-benzo[7]annulene-2-yl]benzoate (2d)</i>   |    |
| <sup>1</sup> H spectrum                                                                                                                          | 44 |
| <sup>13</sup> C spectrum                                                                                                                         | 44 |
| HPLC chromatogram                                                                                                                                | 45 |
| Exact MS spectra                                                                                                                                 | 46 |
| <i>2-[4-(Acetamido)phenyl]-N-{4-[N-methyl-N-(tetrahydro-2H-pyran-4-yl)aminomethyl]phenyl}-6,7-dihydro-5H-benzo[7]annulene-8-carboxamide (2e)</i> |    |
| <sup>1</sup> H spectrum                                                                                                                          | 48 |
| <sup>13</sup> C spectrum                                                                                                                         | 48 |
| gHSQC spectrum                                                                                                                                   | 49 |
| HPLC chromatogram                                                                                                                                | 50 |
| Exact MS spectra                                                                                                                                 | 51 |

*2-[4-(Dimethylamino)phenyl]-N-[4-[N-methyl-N-(tetrahydro-2H-pyran-4-yl)aminomethyl]phenyl]-6,7-dihydro-5H-benzo[7]annulene-8-carboxamide (2f)*

|                          |    |
|--------------------------|----|
| <sup>1</sup> H spectrum  | 53 |
| <sup>13</sup> C spectrum | 53 |
| gHSQC spectrum           | 54 |
| HPLC chromatogram        | 55 |
| Exact MS spectra         | 56 |

*N-[4-[N-Methyl-N-(tetrahydro-2H-pyran-4-yl)aminomethyl]phenyl]-2-(pyridin-3-yl)-6,7-dihydro-5H-benzo[7]annulene-8-carboxamide (2g)*

|                          |    |
|--------------------------|----|
| <sup>1</sup> H spectrum  | 58 |
| <sup>13</sup> C spectrum | 58 |
| gHSQC spectrum           | 59 |
| HPLC chromatogram        | 60 |
| Exact MS spectra         | 61 |

*N-[4-[Methyl(tetrahydro-2H-pyran-4-yl)aminomethyl]phenyl]-2-(5-methylthiophen-2-yl)-6,7-dihydro-5H-benzo[7]annulene-8-carboxamide (2h)*

|                          |    |
|--------------------------|----|
| <sup>1</sup> H spectrum  | 63 |
| <sup>13</sup> C spectrum | 63 |
| gHSQC spectrum           | 64 |
| HPLC chromatogram        | 65 |
| Exact MS spectra         | 66 |

*5-(4-Bromophenyl)-5-oxo-pentanoic acid (4)*

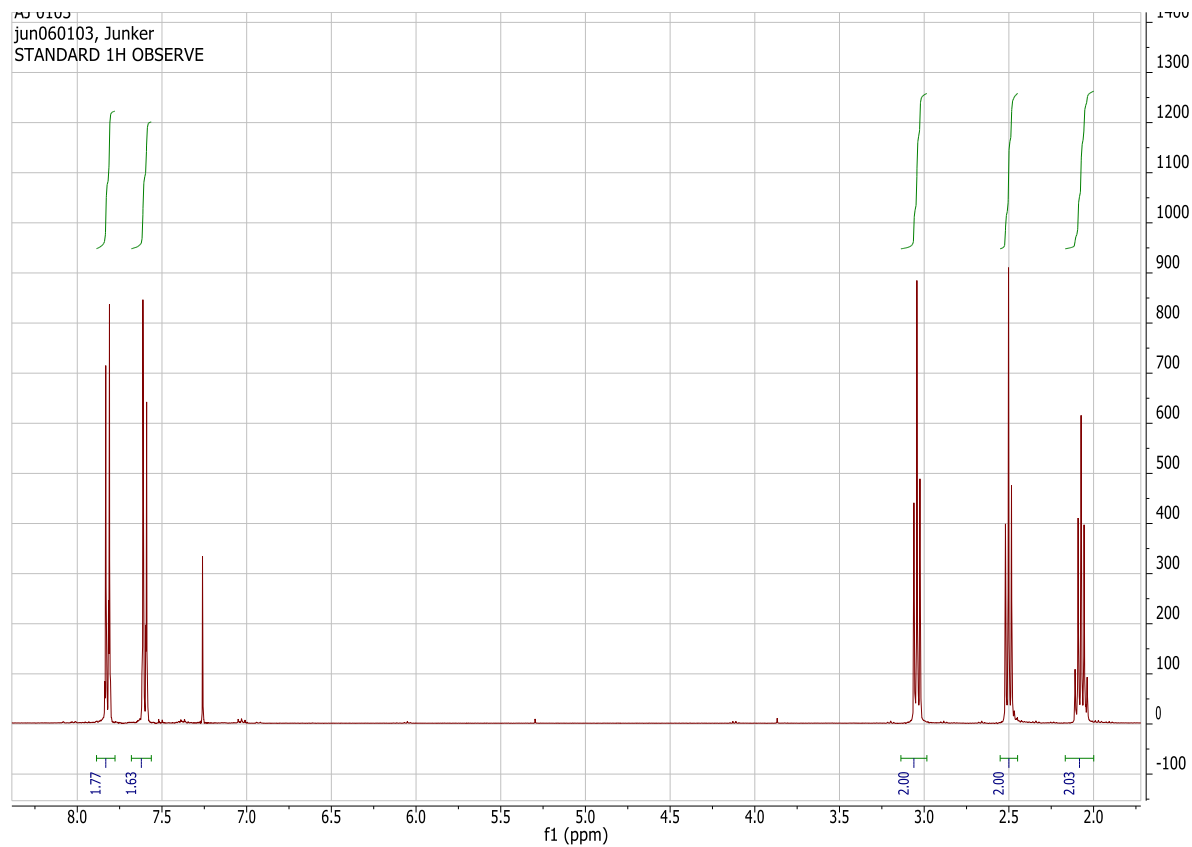

# HPLC

Analyzed: 11.02.10 08:46

Reported: 11.02.10 15:15  
Processed: 11.02.10 15:15

Data Path: D:\WIN32APP\HSM\Chromni\DATA\1176\

Application: Chromni

Sample Name: AJ0113

Injection from this vial: 1 of 1

Series:1176

Vial Number: 19

Vial Type: UNK

Volume: 5,0 ul

Chrom Type: HPLC Channel : 1

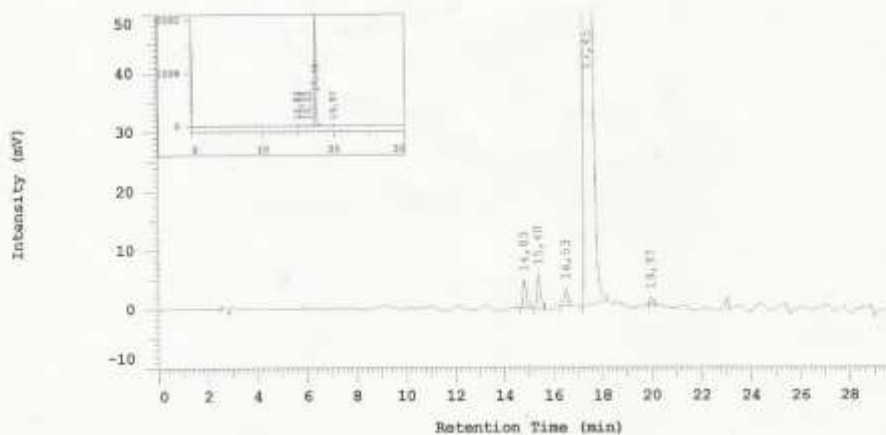

Acquisition Method: Chromni

Blank Subtr Sample Name: ACN

Column Type: 010

Solvent A: Wasser + 0,05%TFA

Developed by: Jens

Solvent B: ACN + 0,05%TFA

| No. | RT    | Area     | Conc 1  | BC |
|-----|-------|----------|---------|----|
| 1   | 14,83 | 40788    | 0,196   | MC |
| 2   | 15,40 | 52660    | 0,253   | MC |
| 3   | 16,53 | 29956    | 0,144   | MC |
| 4   | 17,45 | 20711131 | 99,360  | MC |
| 5   | 19,97 | 10102    | 0,048   | MC |
|     |       | 20844637 | 100,000 |    |

Peak rejection level: 0

## Generic Display Report

### Analysis Info

Analysis Name E:\Meinerst12\_09\WJU\_AJ0113.d  
Method APCI\_directprobe\_positiv.m  
Sample Name AJ0113  
Comment Junker  
APCI-Direkt  
Kalibration mit Fettsaeureestern

Acquisition Date 9/4/2012 8:39:04 AM

Operator Sendker  
Instrument micrOTOF-Q II

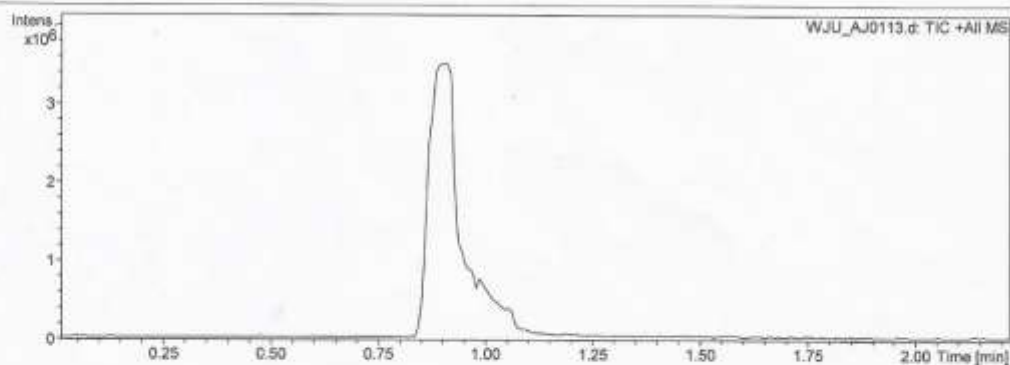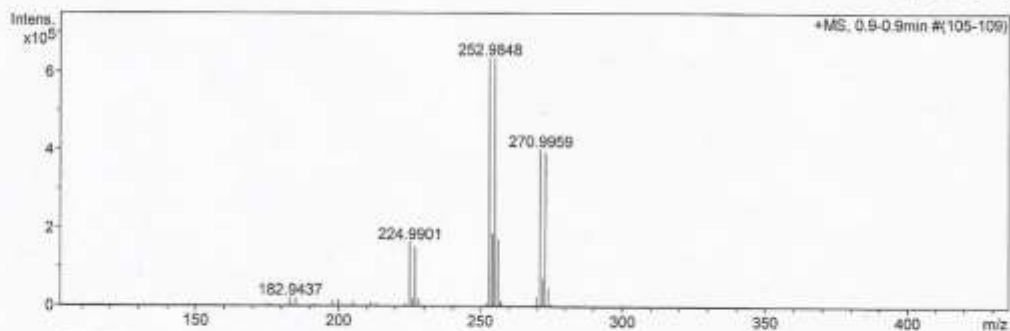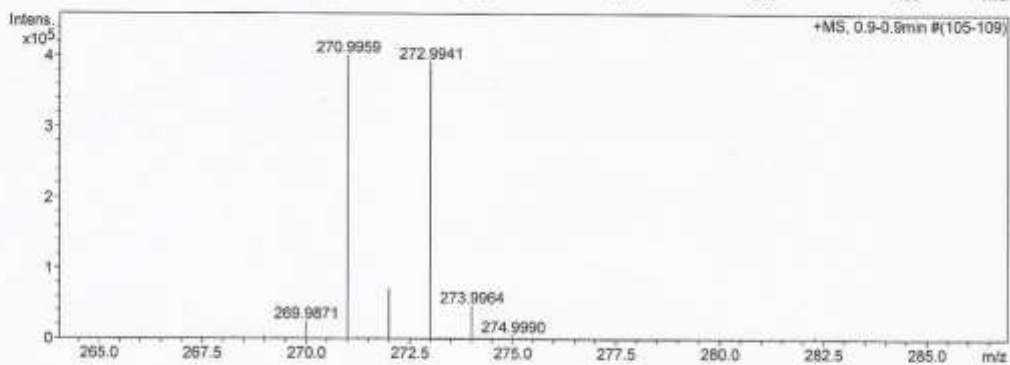

## Mass Spectrum SmartFormula Report

### Analysis Info

Analysis Name E:\Weiners\12\_09\WJU\_AJ0113.d  
Method APCI\_directprobe\_positiv.m  
Sample Name AJ0113  
Comment Junker  
APCI-Direkt  
Kalibration mit Fettsaeureestern

Acquisition Date 9/4/2012 8:39:04 AM

Operator Sender  
Instrument / Ser# micrOTOF-Q II 10252

### Acquisition Parameter

|             |            |                       |           |                  |           |
|-------------|------------|-----------------------|-----------|------------------|-----------|
| Source Type | APCI       | Ion Polarity          | Positive  | Set Nebulizer    | 0.7 Bar   |
| Focus       | Not active | Set Capillary         | 4000 V    | Set Dry Heater   | 200 °C    |
| Scan Begin  | 100 m/z    | Set End Plate Offset  | -500 V    | Set Dry Gas      | 3.0 l/min |
| Scan End    | 1000 m/z   | Set Collision Cell RF | 130.0 Vpp | Set Divert Valve | Waste     |

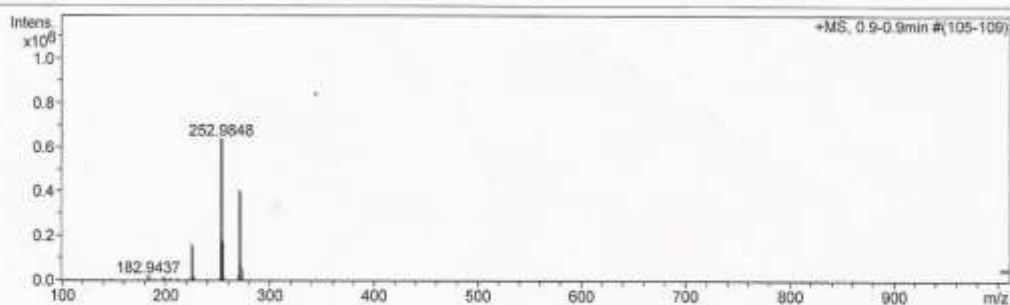

| Meas. m/z | # | Formula          | Score  | m/z      | err [mDa] | err [ppm] | mSigma | rdb  | e <sup>-</sup> Conf | N-Rule |
|-----------|---|------------------|--------|----------|-----------|-----------|--------|------|---------------------|--------|
| 270.9959  | 1 | C 13 H 8 Br N 2  | 0.00   | 270.9885 | -9.4      | -34.6     | 17.7   | 10.5 | even                | ok     |
|           | 2 | C 11 H 12 Br O 3 | 100.00 | 270.9954 | 0.5       | 1.9       | 25.0   | 5.5  | even                | ok     |



5-(4-Bromophenyl) pentanoic acid (**5**)

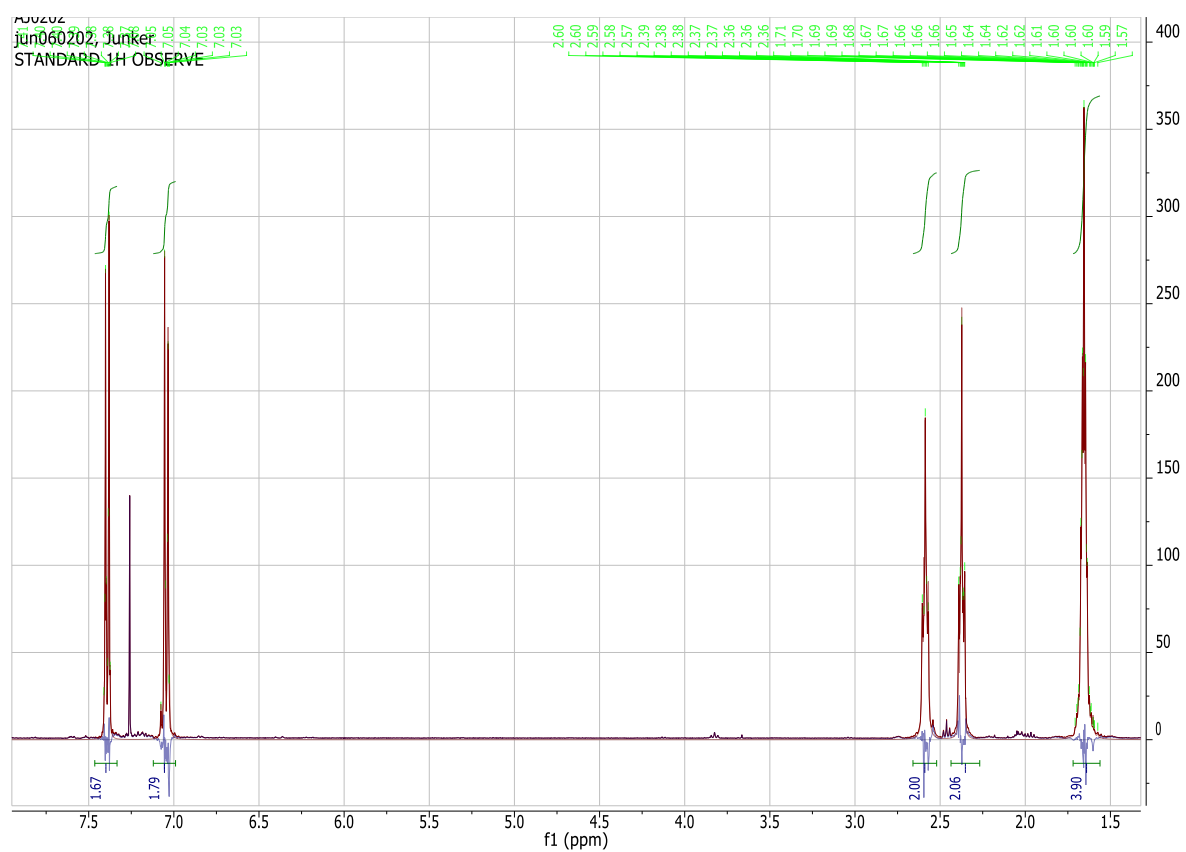

# HPLC

Analyzed: 18.02.10 11:49

Reported: 19.02.10 10:39

Processed: 19.02.10 10:39

Data Path: D:\WIN32APP\HSM\Chromni\DATA\1210\

Application: Chromni

Series:1210

**Sample Name: AJ 0208**

Vial Number: 22

Injection from this vial: 1 of 1

Vial Type: UNK

Volume: 5,0 ul

Chrom Type: HPLC Channel : 1

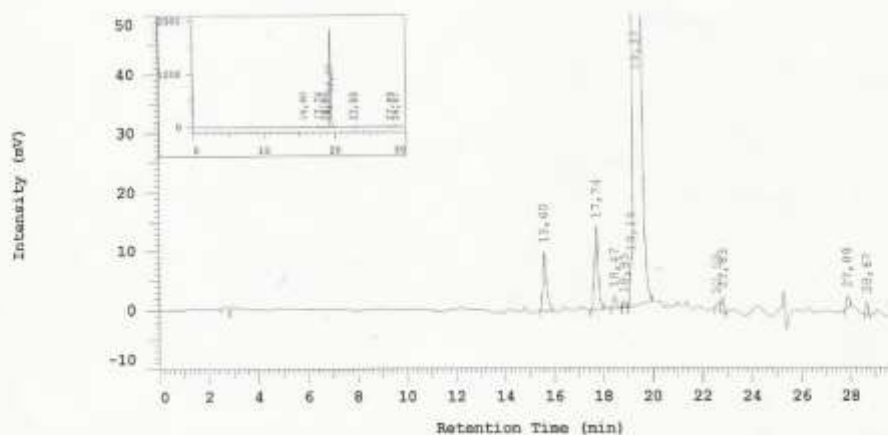

Acquisition Method: Chromni

Blank Subtr Sample Name: ACN

Column Type: 010

Solvent A: Wasser + 0,05%TFA

Developed by: Jens

Solvent B: ACN + 0,05%TFA

| No. | RT    | Area     | Conc 1  | BC |
|-----|-------|----------|---------|----|
| 1   | 15,60 | 99963    | 0,597   | MC |
| 2   | 17,74 | 145693   | 0,869   | BB |
| 3   | 18,47 | 20954    | 0,125   | BB |
| 4   | 18,85 | 7400     | 0,044   | BB |
| 5   | 19,14 | 205966   | 1,229   | MC |
| 6   | 19,37 | 16215217 | 96,764  | VB |
| 7   | 22,59 | 13259    | 0,079   | MC |
| 8   | 22,83 | 19830    | 0,118   | BB |
| 9   | 27,89 | 14126    | 0,084   | MC |
| 10  | 28,67 | 15029    | 0,090   | MC |
|     |       | 16757437 | 100,000 |    |

Peak rejection level: 0

### Generic Display Report

|                      |                                                                     |                  |                      |
|----------------------|---------------------------------------------------------------------|------------------|----------------------|
| <b>Analysis Info</b> |                                                                     | Acquisition Date | 8/18/2010 2:34:55 PM |
| Analysis Name        | D:\Data\IPMC\PharmChemie\Routine\2010_08_16\WJU_AJ0209_GB3_01_992.d | Operator         | Meiners              |
| Method               | kurz_pos_ms_low.m                                                   | Instrument       | micrOTOF-Q II        |
| Sample Name          | WJU_AJ0209                                                          |                  |                      |
| Comment              | Junker<br>AJ0209                                                    |                  |                      |

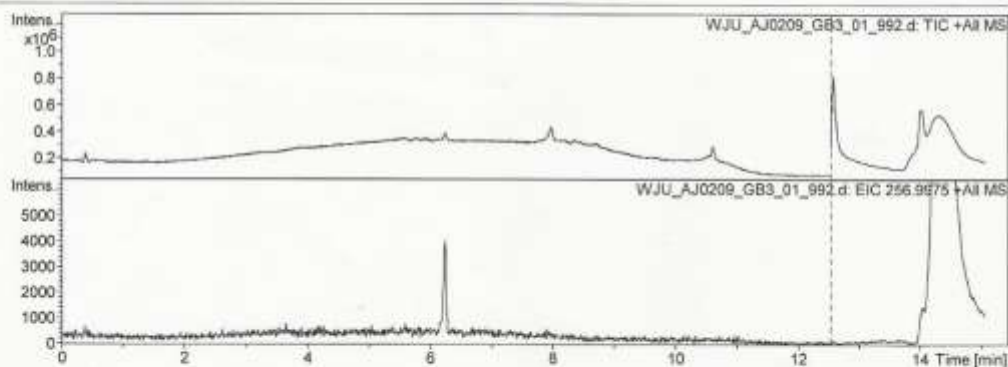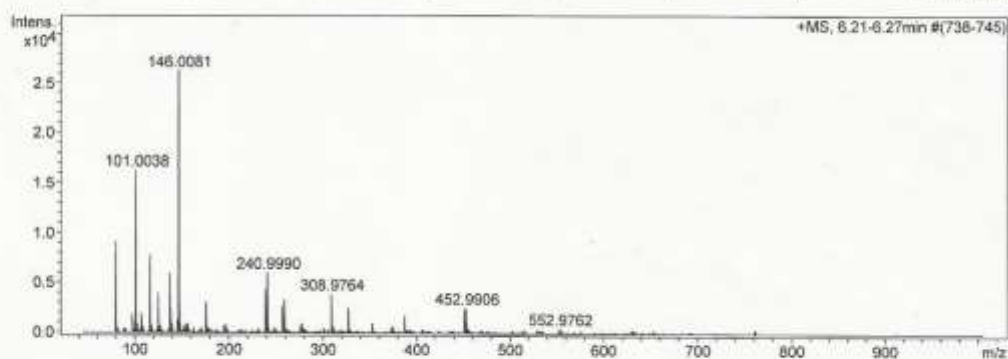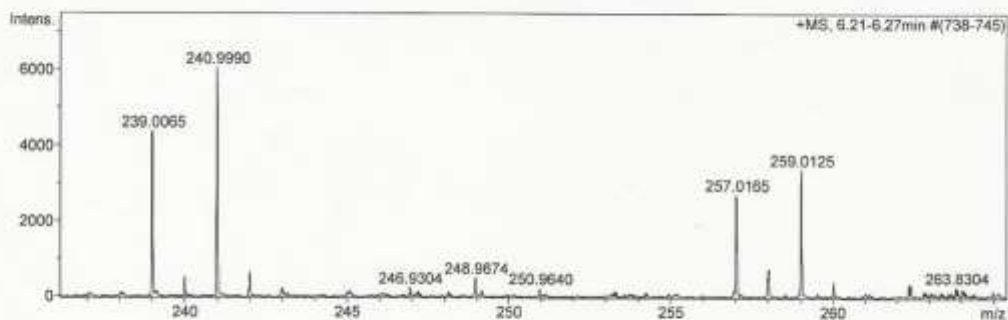

257,0142 27ppm

## Mass Spectrum SmartFormula Report

### Analysis Info

Analysis Name D:\Data\IPMC\PharmChemie\Routine\2010\_08\_16\WJU\_AJ0209\_GB3\_01\_992.d Acquisition Date 8/16/2010 2:34:55 PM  
Method kurz\_pos\_ms\_low.m Operator Meiners  
Sample Name WJU\_AJ0209 Instrument / Ser# micrOTOF-Q II 10252  
Comment Junker  
AJ0209

### Acquisition Parameter

Source Type ESI Ion Polarity Positive Set Nebulizer 4.5 Bar  
Focus Not active Set Capillary 4500 V Set Dry Heater 220 °C  
Scan Begin 50 m/z Set End Plate Offset -500 V Set Dry Gas 9.0 l/min  
Scan End 1000 m/z Set Collision Cell RF 130.0 Vpp Set Divert Valve Waste

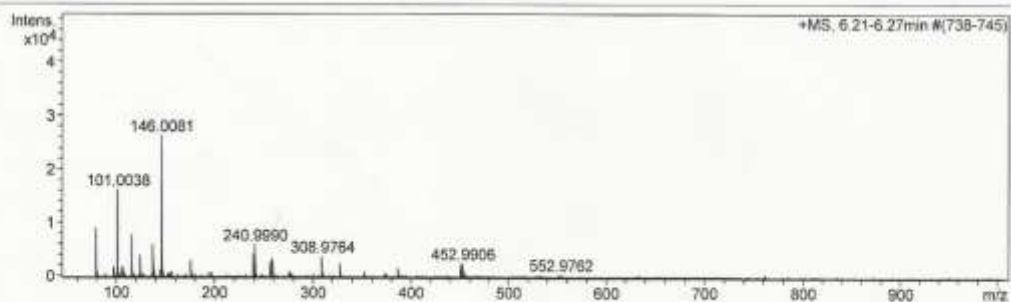

| Meas. m/z | # | Formula             | m/z      | err [mDa] | err [ppm] | mSigma | rdb | e <sup>-</sup> Conf | N-Rule |
|-----------|---|---------------------|----------|-----------|-----------|--------|-----|---------------------|--------|
| 257.0165  | 1 | C 11 H 14 Br O 2    | 257.0172 | -0.7      | 2.7       | 97.9   | 4.5 | even                | ok ✓   |
|           | 2 | C 6 H 14 Br N 2 O 4 | 257.0131 | -3.3      | -12.9     | 110.7  | 0.5 | even                | ok     |
|           | 3 | C 7 H 10 Br N 6     | 257.0145 | -2.0      | -7.7      | 115.3  | 5.5 | even                | ok     |

3-Bromo-6,7,8,9-tetrahydrobenzo[7]annulen-5-one (6)

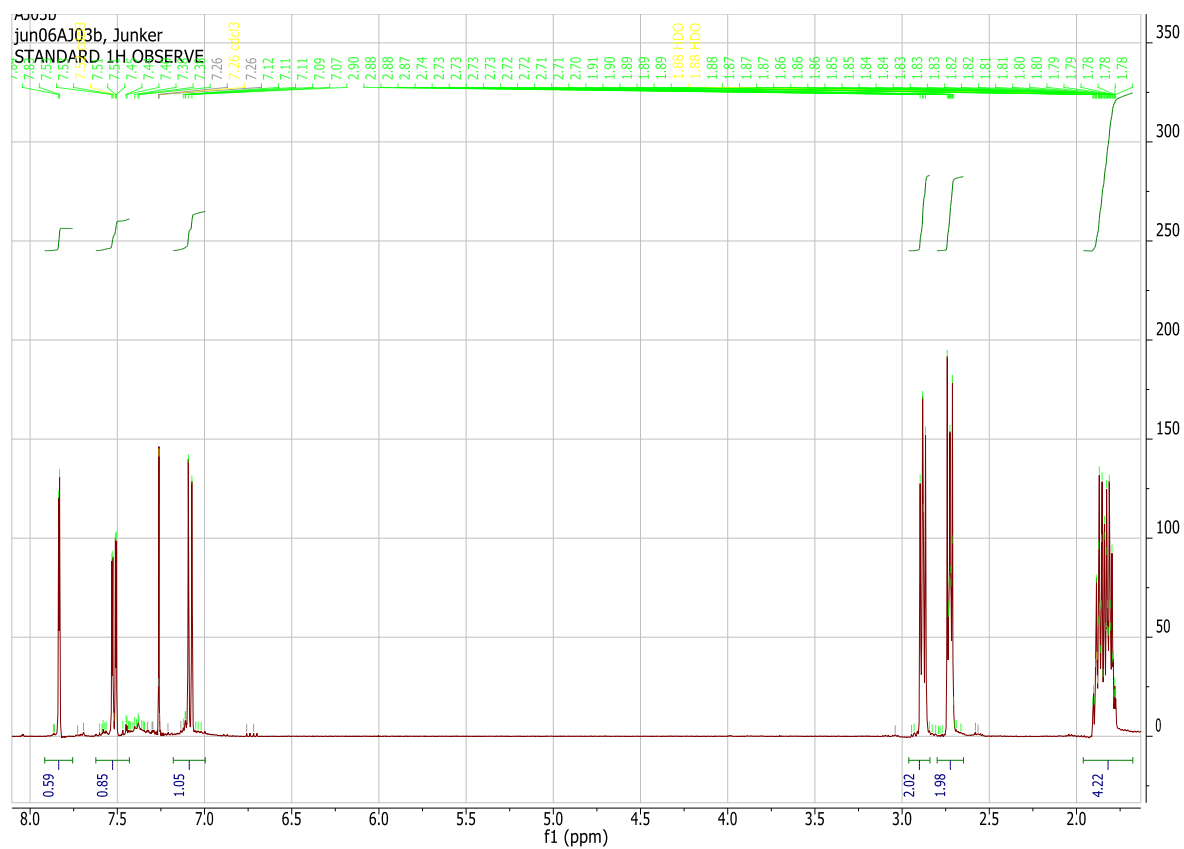

# HPLC

Analyzed: 24.02.10 21:42

Reported: 25.02.10 16:24  
 Processed: 25.02.10 16:24

Data Path: D:\WIN32APP\HSM\Chromni\DATA\1226\  
 Application: Chromni

Series:1226  
 Vial Number: 5  
 Vial Type: UNK  
 Volume: 5,0 ul

**Sample Name: AJ 0323**

Injection from this vial: 1 of 1

Chrom Type: HPLC Channel : 1

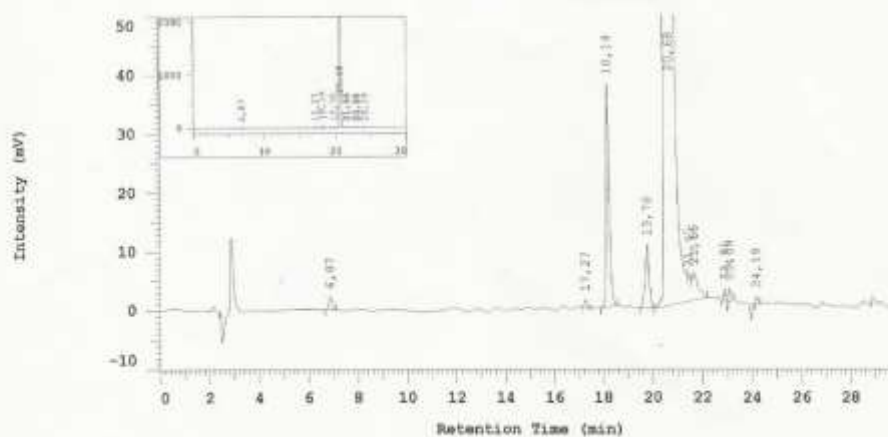

Acquisition Method: Chromni

Blank Subtr Sample Name: ACN

Column Type: 010

Solvent A: Wasser + 0,05%TFA

Developed by: Jens

Solvent B: ACN + 0,05%TFA

| No. | RT    | Area     | Conc 1  | BC |
|-----|-------|----------|---------|----|
| 1   | 6,87  | 22760    | 0,080   | MC |
| 2   | 17,27 | 10524    | 0,037   | MC |
| 3   | 18,19 | 327164   | 1,147   | MC |
| 4   | 19,78 | 116383   | 0,408   | BB |
| 5   | 20,68 | 27900563 | 97,792  | MC |
| 6   | 21,45 | 36189    | 0,127   | MC |
| 7   | 21,66 | 80167    | 0,281   | MC |
| 8   | 22,91 | 10454    | 0,037   | MC |
| 9   | 23,09 | 16657    | 0,058   | MC |
| 10  | 24,19 | 9664     | 0,034   | MC |
|     |       | 28530525 | 100,000 |    |

Peak rejection level: 0

## Generic Display Report

|                      |                                                           |                  |                     |
|----------------------|-----------------------------------------------------------|------------------|---------------------|
| <b>Analysis Info</b> |                                                           | Acquisition Date | 9/7/2012 8:20:42 AM |
| Analysis Name        | D:\Data\PMc\Pharm\Chemie\Routine\APC\12_09\WJU_AJ03.d     | Operator         | Sendker             |
| Method               | APCI_directprobe_positiv.m                                | Instrument       | micrOTOF-Q II       |
| Sample Name          | AJ03                                                      |                  |                     |
| Comment              | Junker<br>APCI-Direkt<br>Kalibration mit Fettsaeureestern |                  |                     |

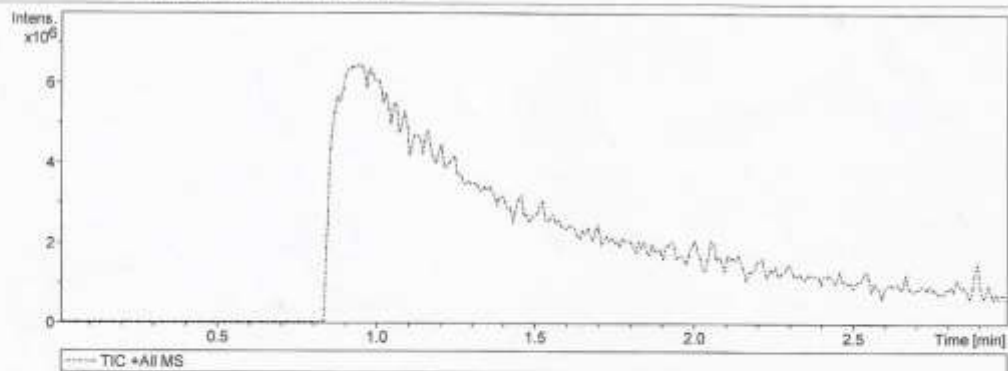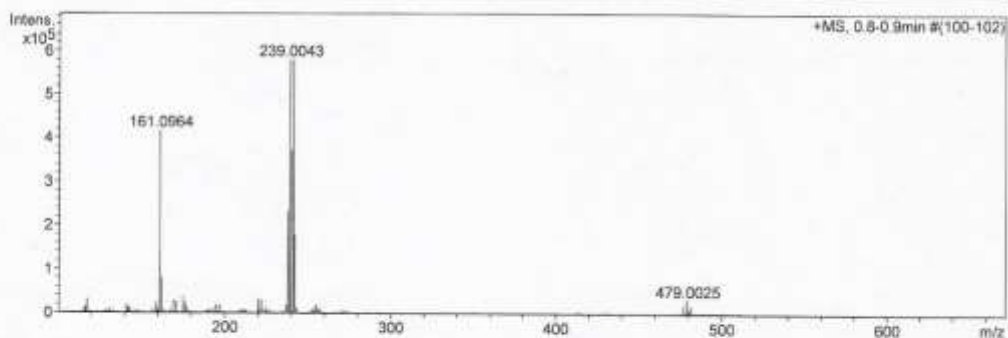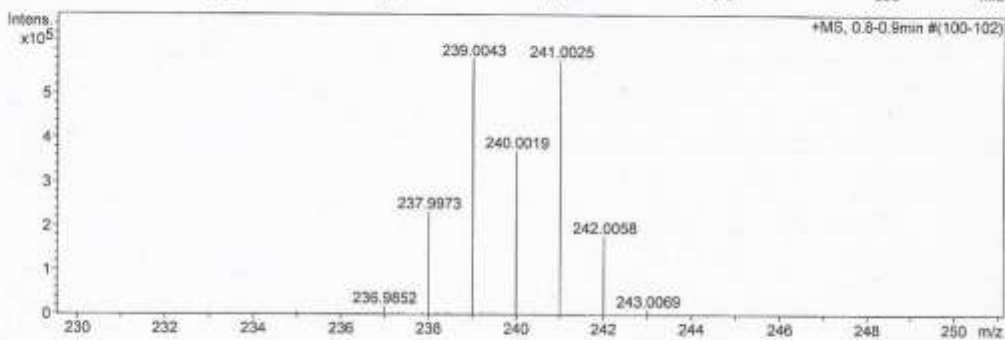

## Mass Spectrum SmartFormula Report

**Analysis Info**  
Analysis Name: D:\Data\PMCI\PharmChemie\Routine\APCI\12\_09WJU\_AJ03.d  
Method: APCI\_directprobe\_positiv.m  
Sample Name: AJ03  
Comment: Junker  
APCI-Direkt  
Kalibration mit Fettsaeureestern

Acquisition Date: 9/7/2012 8:20:42 AM  
Operator: Sender  
Instrument / Ser#: micrOTOF-Q II 10252

### Acquisition Parameter

|             |            |                       |           |                  |           |
|-------------|------------|-----------------------|-----------|------------------|-----------|
| Source Type | APCI       | Ion Polarity          | Positive  | Set Nebulizer    | 0.7 Bar   |
| Focus       | Not active | Set Capillary         | 4000 V    | Set Dry Heater   | 200 °C    |
| Scan Begin  | 100 m/z    | Set End Plate Offset  | -500 V    | Set Dry Gas      | 3.0 l/min |
| Scan End    | 1000 m/z   | Set Collision Cell RF | 130.0 Vpp | Set Divert Valve | Waste     |

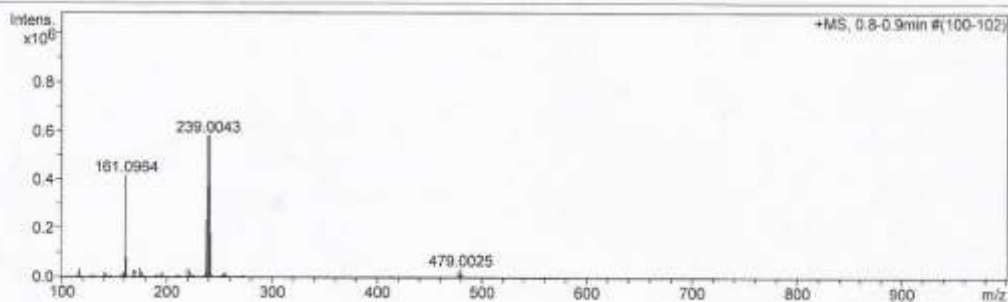

| Meas. m/z | # | Formula             | Score  | m/z      | err [mDa] | err [ppm] | mSigma | rdb | e <sup>-</sup> Conf | N-Rule |
|-----------|---|---------------------|--------|----------|-----------|-----------|--------|-----|---------------------|--------|
| 239.0043  | 1 | C 11 H 12 Br O      | 100.00 | 239.0066 | -2.3      | 9.8       | 247.6  | 5.5 | even                | ok     |
|           | 2 | C 6 H 12 Br N 2 O 3 | 9.28   | 239.0026 | -1.7      | -7.0      | 274.3  | 1.5 | even                | ok     |



*Methyl 2-bromo-6,7-dihydro-5H-benzo[7]annulene-8-carboxylate (9)*

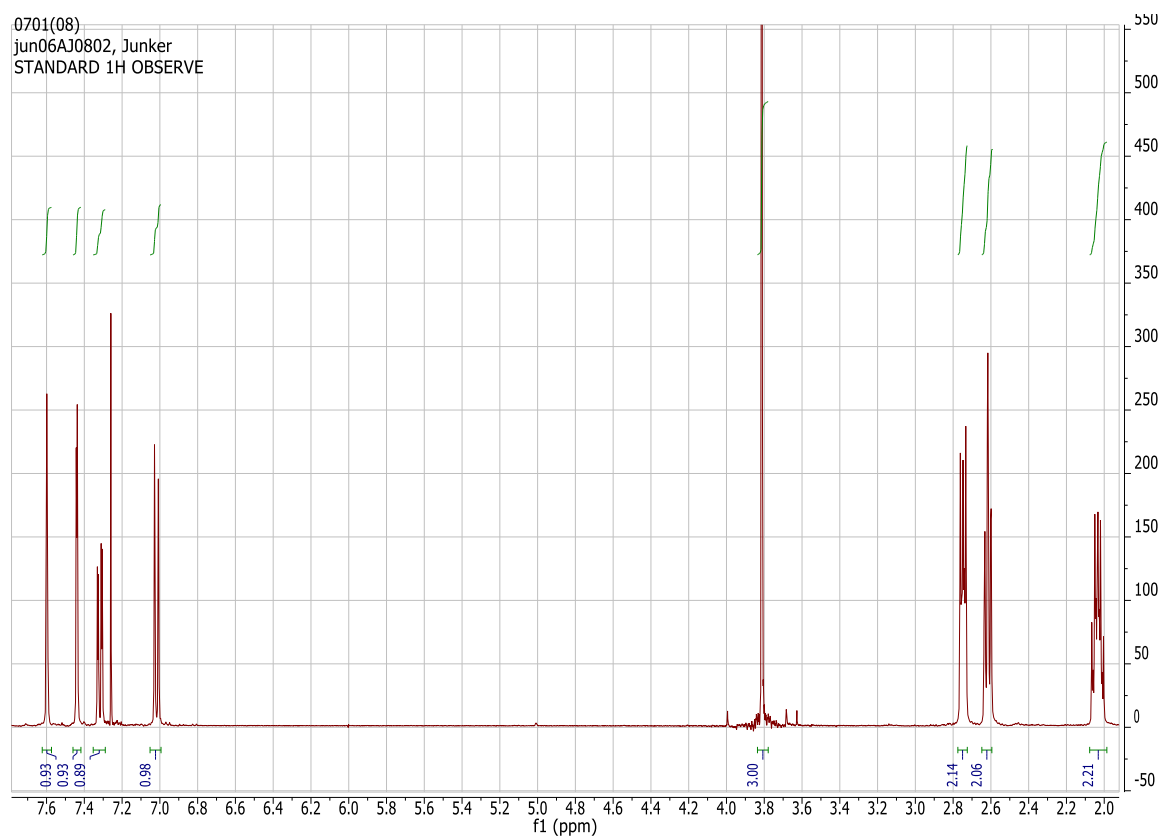

## HPLC

Analyzed: 20.06.11 17:18

Reported: 21.06.11 09:38

Processed: 21.06.11 09:38

Data Path: D:\WIN32APP\HSM\Chromni\DATA\3186\

Application: Chromni

Series:3186

**Sample Name: AJ0804**

Vial Number: 5

Injection from this vial: 1 of 1

Vial Type: UNK

Volume: 5,0 ul

Chrom Type: HPLC Channel : 1

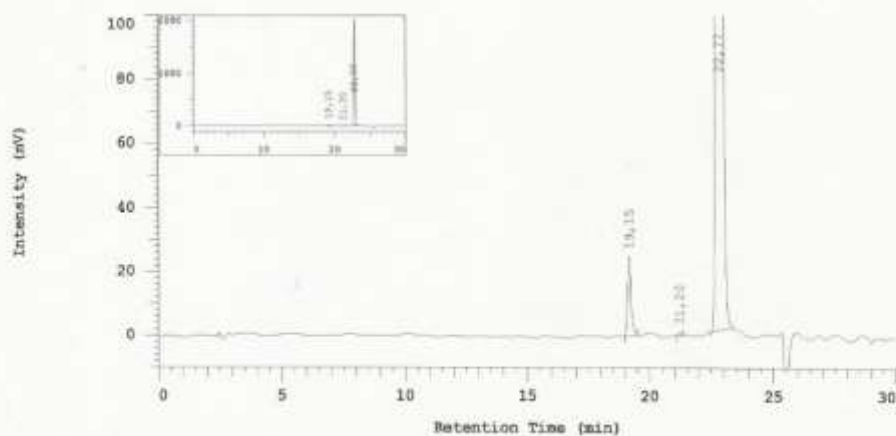

Acquisition Method: Chromni

Blank Subtr Sample Name: ACN

Column Type: 010

Solvent A: Wasser + 0,05%TFA

Developed by: Jens

Solvent B: ACN + 0,05%TFA

| No. | RT    | Area     | Conc 1  | BC |
|-----|-------|----------|---------|----|
| 1   | 19,15 | 240471   | 1,228   | MC |
| 2   | 21,20 | 5846     | 0,030   | BB |
| 3   | 22,77 | 19338883 | 98,742  | MC |
|     |       | 19585200 | 100,000 |    |

Peak rejection level: 0

## Generic Display Report

### Analysis Info

|               |                                                                     |                  |                      |
|---------------|---------------------------------------------------------------------|------------------|----------------------|
| Analysis Name | D:\Data\PMCI\PharmChemie\Routine\2010_08_16\WJU_AJ0802_GB5_01_994.d | Acquisition Date | 8/16/2010 3:07:32 PM |
| Method        | kurz_pos_ms_low.m                                                   | Operator         | Meiners              |
| Sample Name   | WJU_AJ0802                                                          | Instrument       | micrOTOF-Q II        |
| Comment       | Junker<br>AJ0802                                                    |                  |                      |

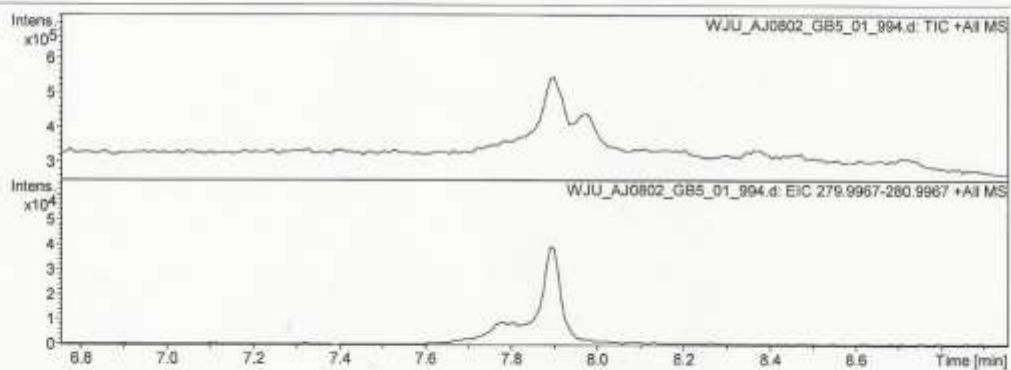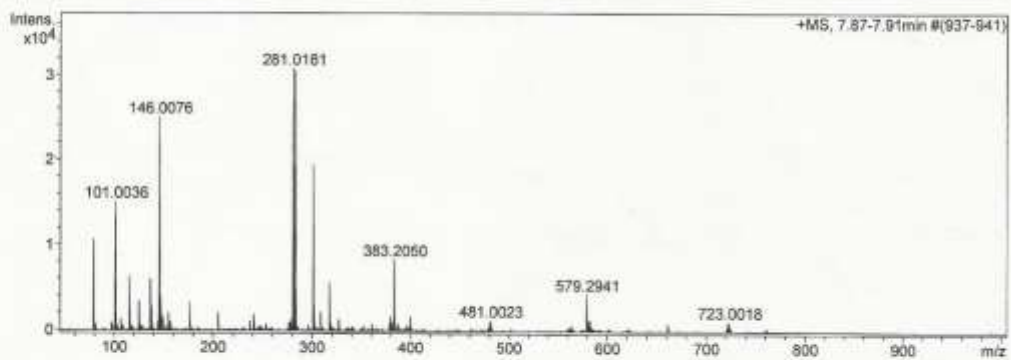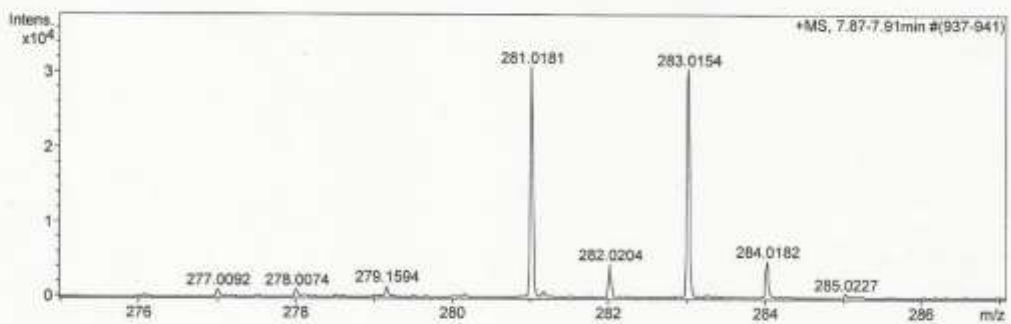

## Mass Spectrum SmartFormula Report

### Analysis Info

Analysis Name D:\Data\PMC\PharmChemie\Routine\2010\_08\_16\WJU\_AJ0802\_GB5\_01\_994.d  
Method kurz\_pos\_ms\_low.m  
Sample Name WJU\_AJ0802  
Comment Junker  
AJ0802

Acquisition Date 8/16/2010 3:07:32 PM

Operator Meiners

Instrument / Ser# micrOTOF-Q II 10252

### Acquisition Parameter

Source Type ESI  
Focus Not active  
Scan Begin 50 m/z  
Scan End 1000 m/z  
Ion Polarity Positive  
Set Capillary 4500 V  
Set End Plate Offset -500 V  
Set Collision Cell RF 130.0 Vpp  
Set Nebulizer 4.5 Bar  
Set Dry Heater 220 °C  
Set Dry Gas 9.0 l/min  
Set Divert Valve Waste

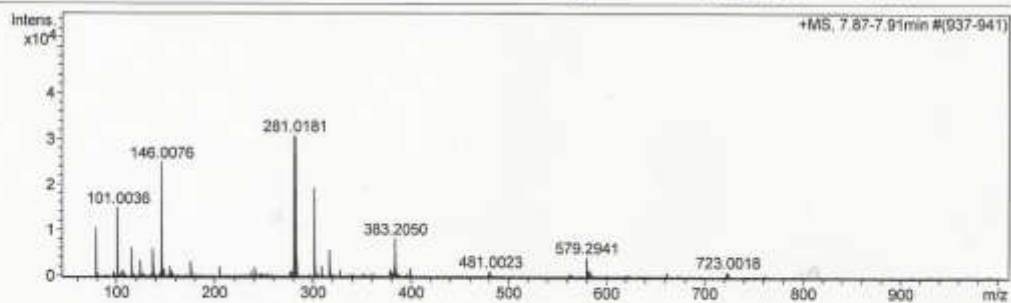

| Meas. m/z | # | Formula          | m/z      | err [mDa] | err [ppm] | mSigma | rdb | e <sup>-</sup> | Conf | N-Rule |
|-----------|---|------------------|----------|-----------|-----------|--------|-----|----------------|------|--------|
| 281.0181  | 1 | C 13 H 14 Br O 2 | 281.0172 | -0.9      | -3.4      | 10.3   | 6.5 | even           |      | ok ✓   |
|           | 2 | C 9 H 10 Br N 6  | 281.0145 | -3.6      | -12.9     | 23.3   | 7.5 | even           |      | ok ✓   |

2-Bromo-6,7-dihydro-5H-benzo[7]annulene-8-carboxylic acid (**10**)

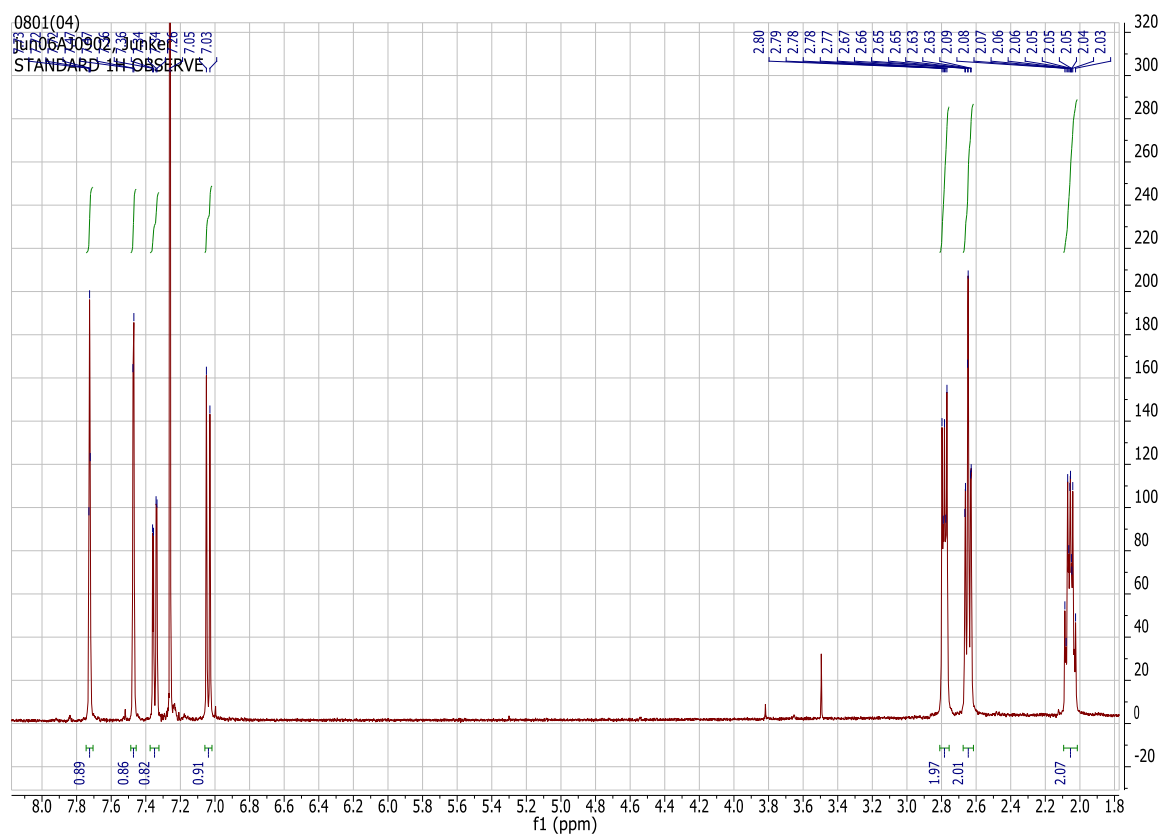

## HPLC

Analyzed: 20.06.11 17:59

Reported: 21.06.11 09:39  
Processed: 21.06.11 09:39

Data Path: D:\WIN32APP\HSM\Chromni\DATA\3187\  
Application: Chromni

**Sample Name: AJ0904**

Series: 3187  
Vial Number: 6  
Vial Type: UNK  
Volume: 5,0 ul

Injection from this vial: 1 of 1

Chrom Type: HPLC Channel : 1

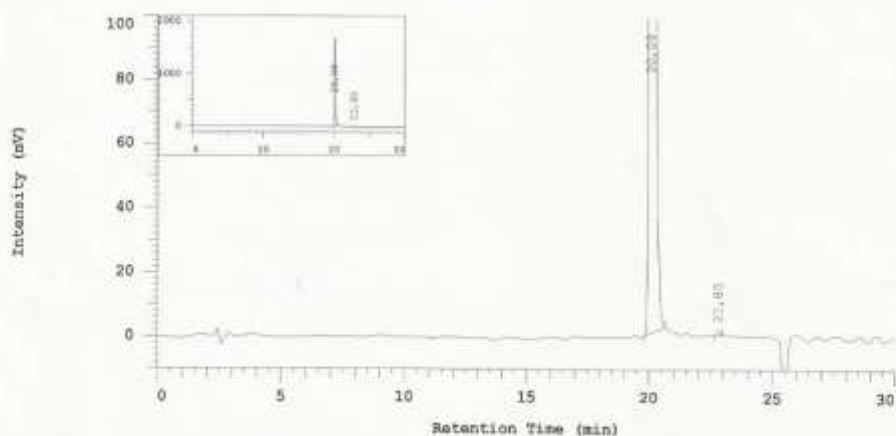

Acquisition Method: Chromni

Blank Subtr Sample Name: ACN

Column Type: 010

Solvent A: Wasser + 0,05%TFA

Developed by: Jens

Solvent B: ACN + 0,05%TFA

| No. | RT    | Area     | Conc 1  | BC |
|-----|-------|----------|---------|----|
| 1   | 20,09 | 16077145 | 99,936  | MC |
| 2   | 22,80 | 10224    | 0,064   | BB |
|     |       | 16087369 | 100,000 |    |

Peak rejection level: 0

## Generic Display Report

|                      |                                                                      |                  |                      |
|----------------------|----------------------------------------------------------------------|------------------|----------------------|
| <b>Analysis Info</b> |                                                                      | Acquisition Date | 8/16/2010 3:23:51 PM |
| Analysis Name        | D:\Data\PMCI\Pharm\Chemie\Routine\2010_08_16\WJU_AJ0902_GC1_01_995.d | Operator         | Meiners              |
| Method               | kurz_pos_ms_low.m                                                    | Instrument       | micrOTOF-Q II        |
| Sample Name          | WJU_AJ0902                                                           |                  |                      |
| Comment              | Junker<br>AJ0902                                                     |                  |                      |

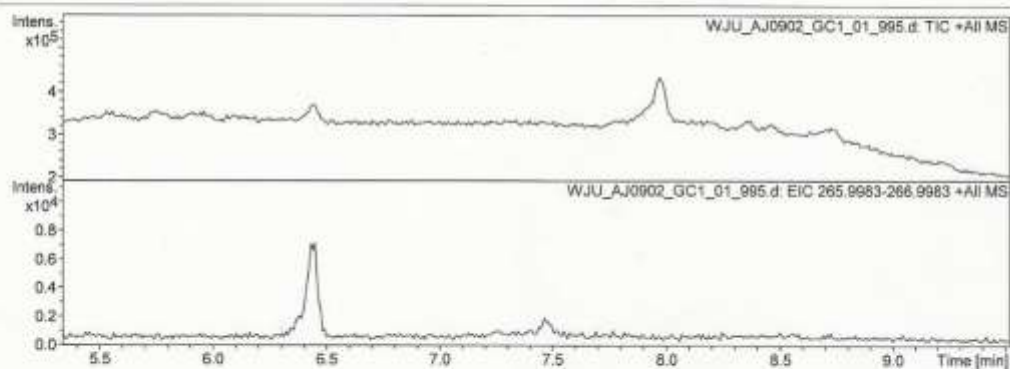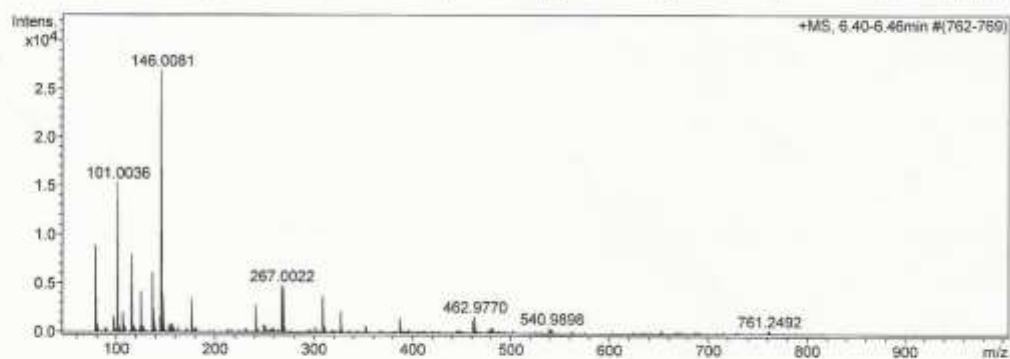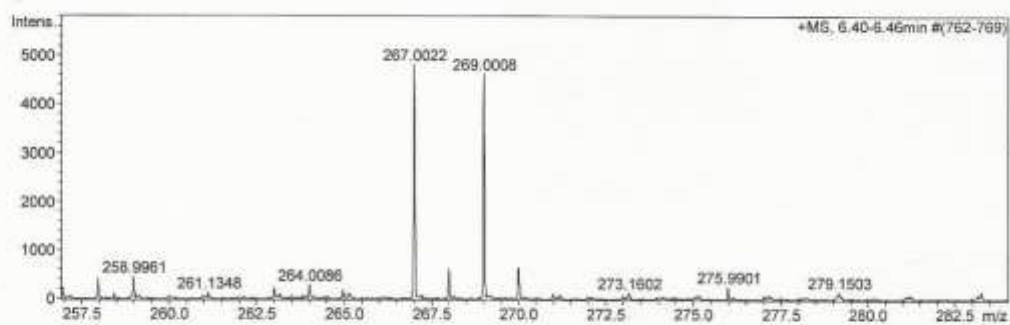

## Mass Spectrum SmartFormula Report

**Analysis Info**  
Analysis Name: D:\Data\IPMC\PharmChemie\Routine\2010\_08\_16\WJU\_AJ0902\_GC1\_01\_995.d  
Method: kurz\_pos\_ms\_low.m  
Sample Name: WJU\_AJ0902  
Comment: Junker  
AJ0902  
Acquisition Date: 8/16/2010 3:23:51 PM  
Operator: Meiners  
Instrument / Ser#: micrOTOF-Q II 10252

**Acquisition Parameter**  
Source Type: ESI  
Focus: Not active  
Scan Begin: 50 m/z  
Scan End: 1000 m/z  
Ion Polarity: Positive  
Set Capillary: 4500 V  
Set End Plate Offset: -500 V  
Set Collision Cell RF: 130.0 Vpp  
Set Nebulizer: 4.5 Bar  
Set Dry Heater: 220 °C  
Set Dry Gas: 8.0 l/min  
Set Divert Valve: Waste

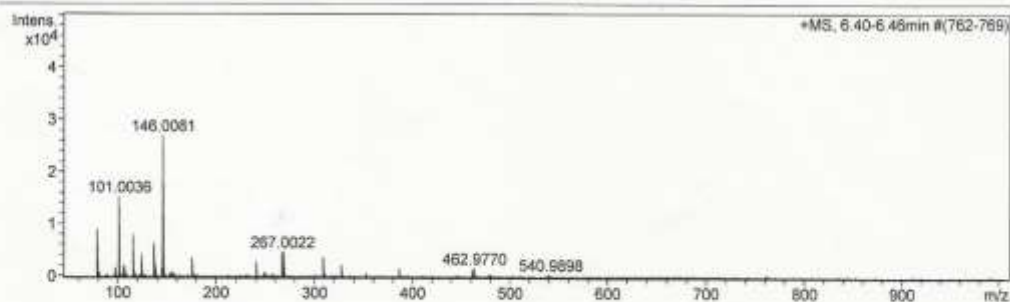

| Meas. m/z | # | Formula                                          | m/z      | err [mDa] | err [ppm] | mSigma | rdB | e <sup>-</sup> Conf | N-Rule |
|-----------|---|--------------------------------------------------|----------|-----------|-----------|--------|-----|---------------------|--------|
| 267.0022  | 1 | C <sub>12</sub> H <sub>12</sub> BrO <sub>2</sub> | 267.0015 | -0.7      | -2.7      | 13.8   | 6.5 | even                | ok     |
|           | 2 | C <sub>8</sub> H <sub>8</sub> BrN <sub>6</sub>   | 266.9988 | -3.4      | -12.8     | 19.3   | 7.5 | even                | ok     |



2-Bromo-N-{4-[N-methyl-N-(tetrahydro-2H-pyran-4-yl)aminomethyl]phenyl}-6,7-dihydro-5H-benzo[7]annulene-8-carboxamide (**3**)

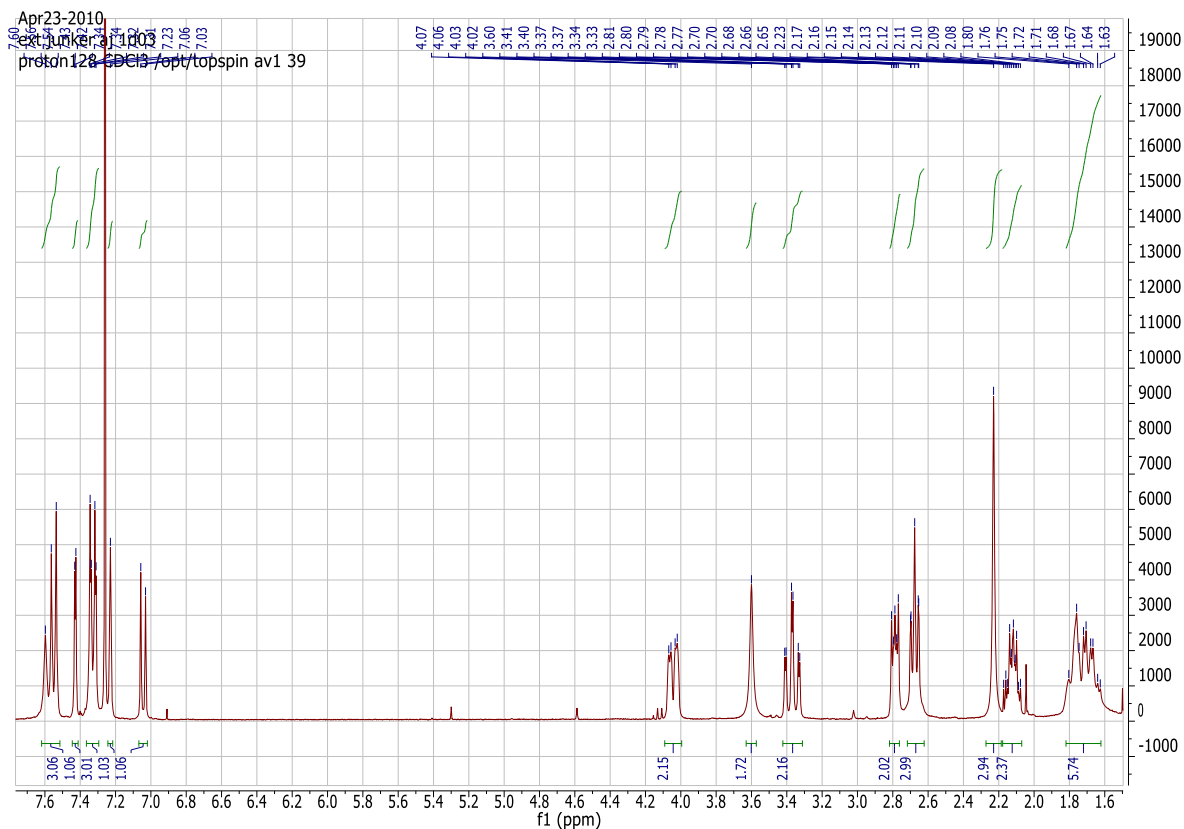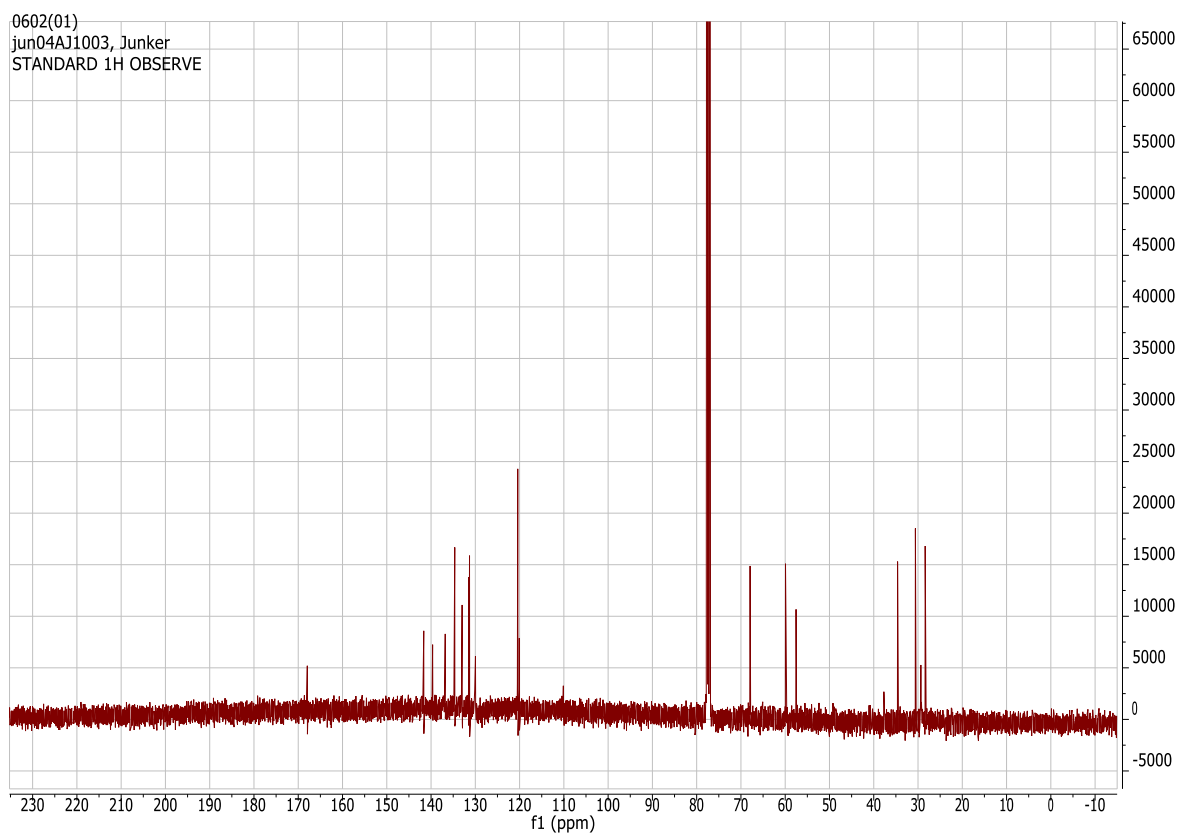

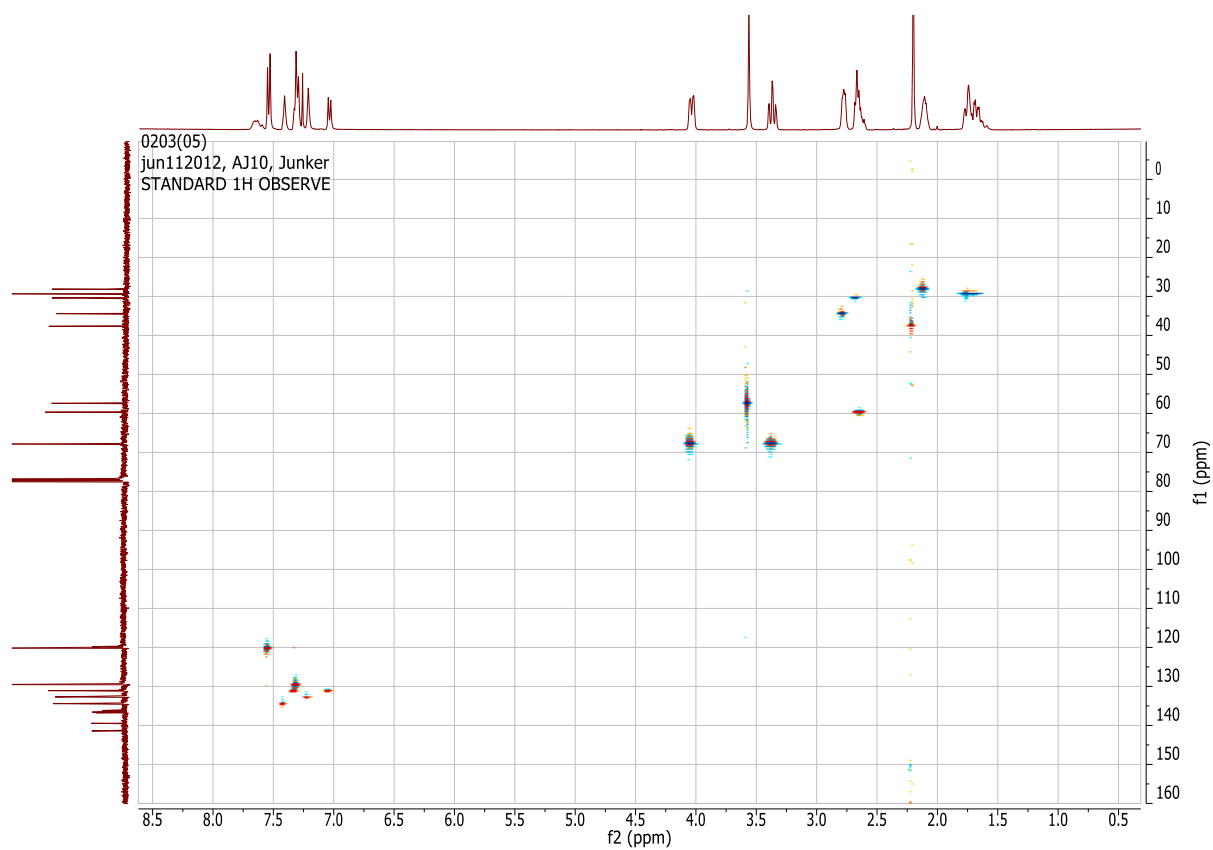

## HPLC

Analyzed: 31.03.11 09:45

Reported: 31.03.11 15:23  
Processed: 31.03.11 15:23

Data Path: D:\WIN32APP\HSM\Chromni\DATA\2898\  
Application: Chromni

Sample Name: AJ1008

Series: 2898

Vial Number: 20

Injection from this vial: 1 of 1

Vial Type: UNK

Volume: 5,0 ul

Chrom Type: HPLC Channel : 1

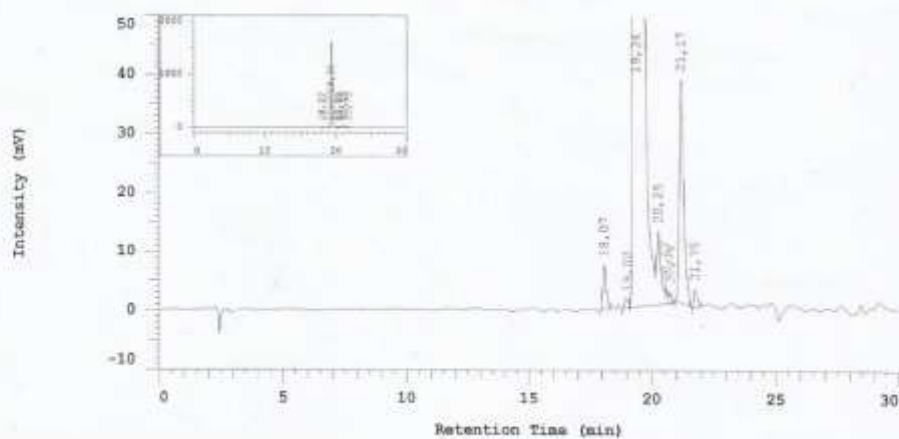

Acquisition Method: Chromni

Blank Subtr Sample Name: ACN

Column Type: 010

Solvent A: Wasser + 0,05%TFA

Developed by: Jens

Solvent B: ACN + 0,05%TFA

| No. | RT    | Area     | Conc 1  | BC |
|-----|-------|----------|---------|----|
| 1   | 18,07 | 68144    | 0,278   | MC |
| 2   | 19,00 | 15774    | 0,064   | MC |
| 3   | 19,34 | 23790344 | 96,903  | MC |
| 4   | 20,25 | 156101   | 0,636   | MC |
| 5   | 20,57 | 18924    | 0,077   | MC |
| 6   | 20,74 | 11031    | 0,045   | MC |
| 7   | 21,17 | 461853   | 1,881   | MC |
| 8   | 21,75 | 28486    | 0,116   | BB |
|     |       | 24550657 | 100,000 |    |

Peak rejection level: 0

## Generic Display Report

### Analysis Info

Analysis Name E:\Meiners\12\_09\WJU\_AJ1007.d  
Method APCI\_directprobe\_positiv.m  
Sample Name AJ1007  
Comment Junker  
APCI-Direkt  
Kalibration mit Fettsaeureestern

Acquisition Date 9/5/2012 8:52:07 AM

Operator Sendker  
Instrument micrOTOF-Q II

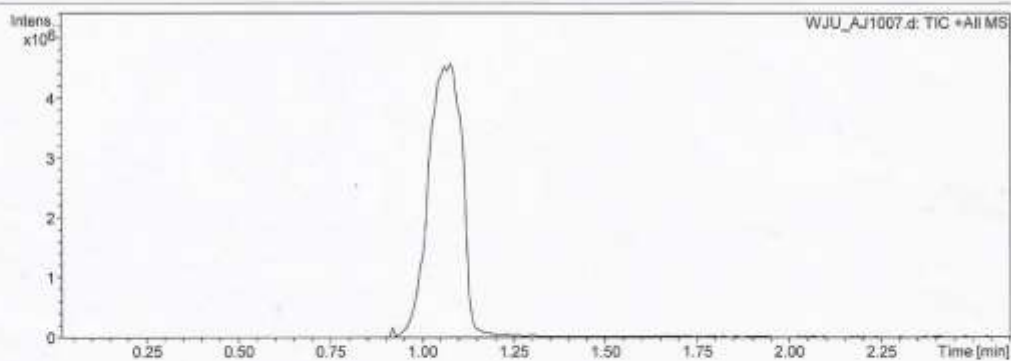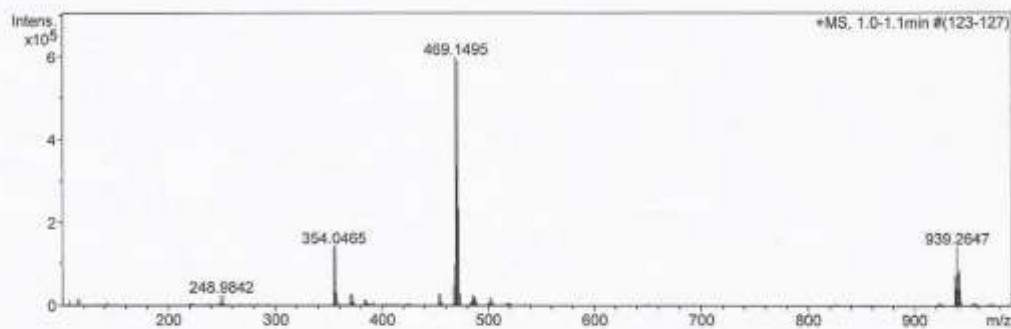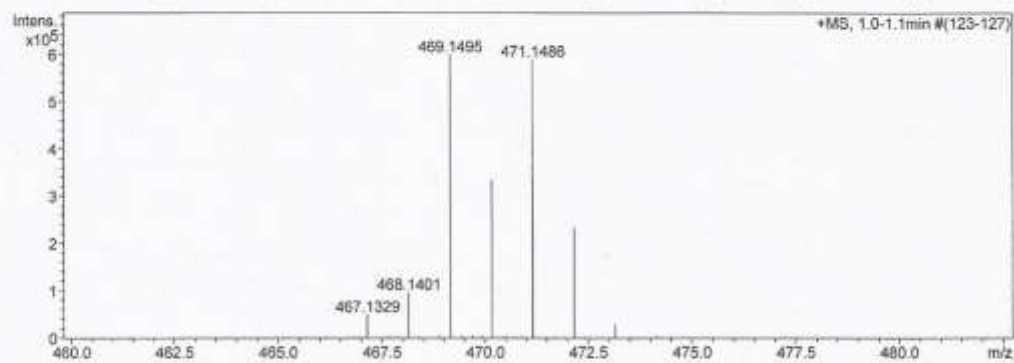

## Mass Spectrum SmartFormula Report

### Analysis Info

Analysis Name E:\Meiners\12\_09\WJU\_AJ1007.d  
Method APCI\_directprobe\_positiv.m  
Sample Name AJ1007  
Comment Junker  
APCI-Direkt  
Kalibration mit Fettsaeureestern

Acquisition Date 9/5/2012 8:52:07 AM

Operator Sender  
Instrument / Ser# micrOTOF-Q II 10252

### Acquisition Parameter

|             |            |                       |           |                  |           |
|-------------|------------|-----------------------|-----------|------------------|-----------|
| Source Type | APCI       | Ion Polarity          | Positive  | Set Nebulizer    | 0.7 Bar   |
| Focus       | Not active | Set Capillary         | 4000 V    | Set Dry Heater   | 200 °C    |
| Scan Begin  | 100 m/z    | Set End Plate Offset  | -500 V    | Set Dry Gas      | 3.0 l/min |
| Scan End    | 1000 m/z   | Set Collision Cell RF | 130.0 Vpp | Set Divert Valve | Waste     |

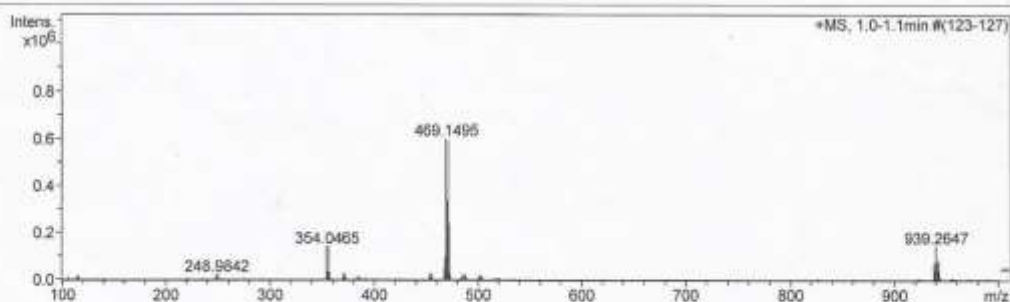

| Mass. m/z | # | Formula               | Score  | m/z      | err [mDa] | err [ppm] | mSigma | rdb  | e <sup>-</sup> Conf | N-Rule |
|-----------|---|-----------------------|--------|----------|-----------|-----------|--------|------|---------------------|--------|
| 469.1495  | 1 | C 30 H 30 Br          | 100.00 | 469.1525 | 3.1       | 6.5       | 103.6  | 15.5 | even                | ok     |
|           | 2 | C 25 H 30 Br N 2 O 2  | 75.81  | 469.1485 | -1.0      | -2.0      | 138.3  | 11.5 | even                | ok     |
|           | 3 | C 21 H 26 Br N 8      | 4.14   | 469.1458 | -3.6      | -7.8      | 149.1  | 12.5 | even                | ok     |
|           | 4 | C 15 H 26 Br N 12 O   | 0.56   | 469.1530 | 3.6       | 7.8       | 178.5  | 8.5  | even                | ok     |
|           | 5 | C 14 H 30 Br N 8 O 5  | 0.61   | 469.1517 | 2.2       | 4.8       | 193.4  | 3.5  | even                | ok     |
|           | 6 | C 10 H 26 Br N 14 O 3 | 0.63   | 469.1490 | -0.4      | -1.0      | 206.4  | 4.5  | even                | ok     |

2-(4-Methylphenyl)-N-{4-[N-methyl-N-(tetrahydro-2H-pyran-4-yl)aminomethyl]phenyl}-6,7-dihydro-5H-benzo[7]annulene-8-carboxamide (**2a**)

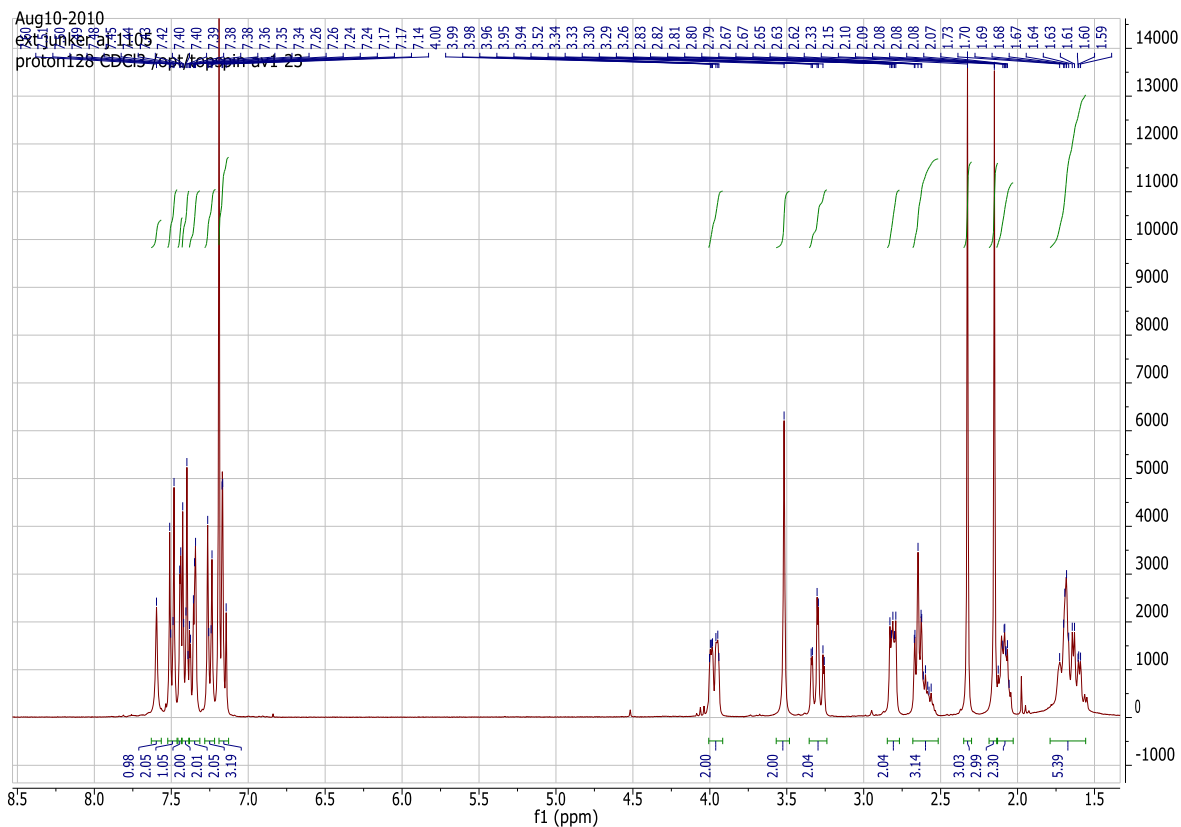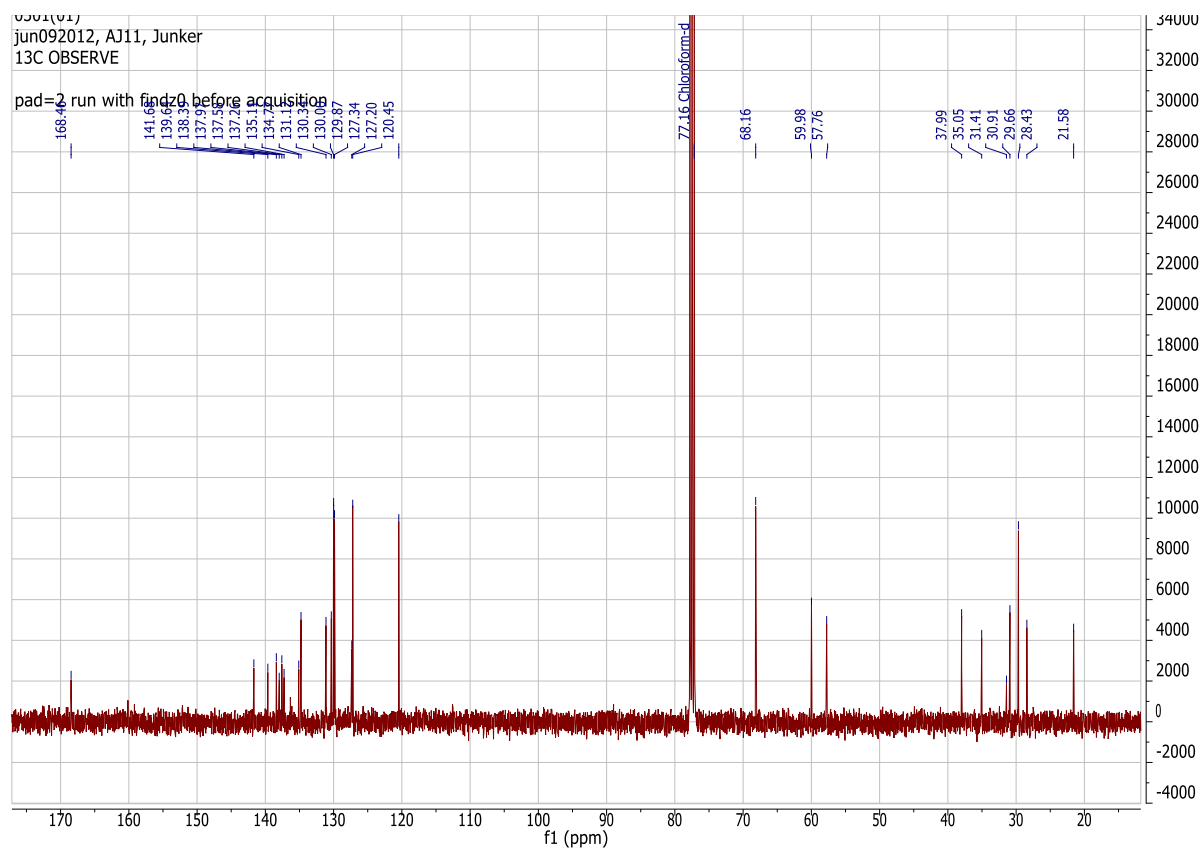

# HPLC

Analyzed: 27.10.10 21:41

Reported: 28.10.10 16:22  
 Processed: 28.10.10 16:22

Data Path: D:\WIN32APP\HSM\Chromni\DATA\2304\  
 Application: Chromni

Series: 2304  
 Vial Number: 6  
 Vial Type: UNK  
 Volume: 5,0 ul

**Sample Name: AJ1106**

Injection from this vial: 1 of 1

Chrom Type: HPLC Channel : 1

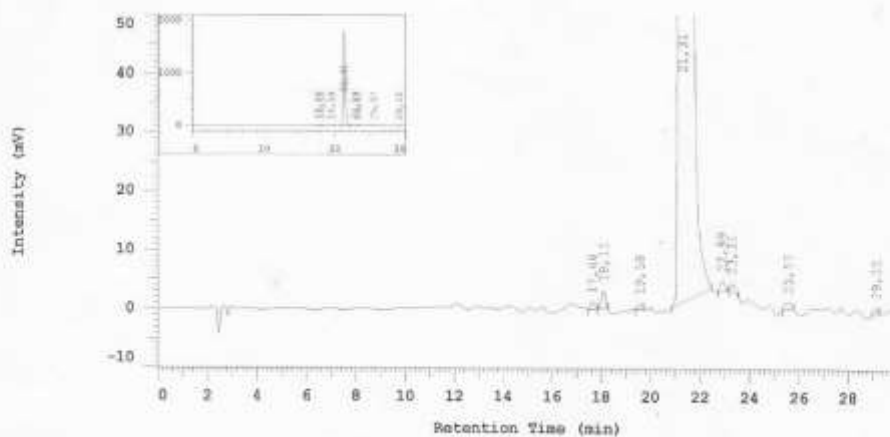

Acquisition Method: Chromni

Blank Subtr Sample Name: ACN

Column Type: 010

Solvent A: Wasser + 0,05%TFA

Developed by: Jens

Solvent B: ACN + 0,05%TFA

| No. | RT    | Area     | Conc 1  | BC |
|-----|-------|----------|---------|----|
| 1   | 17,66 | 13404    | 0,039   | BB |
| 2   | 18,11 | 36545    | 0,108   | BB |
| 3   | 19,58 | 11382    | 0,033   | BB |
| 4   | 21,31 | 33844163 | 99,601  | MC |
| 5   | 22,89 | 19358    | 0,057   | MC |
| 6   | 23,31 | 20396    | 0,060   | MC |
| 7   | 25,57 | 22792    | 0,067   | BB |
| 8   | 29,15 | 11760    | 0,035   | BB |
|     |       | 33979800 | 100,000 |    |

Peak rejection level: 0

## Generic Display Report

### Analysis Info

Analysis Name E:\Weiners\12\_09\WJU\_AJ11.d  
Method APCI\_directprobe\_positiv.m  
Sample Name AJ11  
Comment Junker  
APCI-Direkt  
Kalibration mit Fettsaeureestern

Acquisition Date 9/4/2012 11:44:15 AM

Operator Sendker  
Instrument micrOTOF-Q II

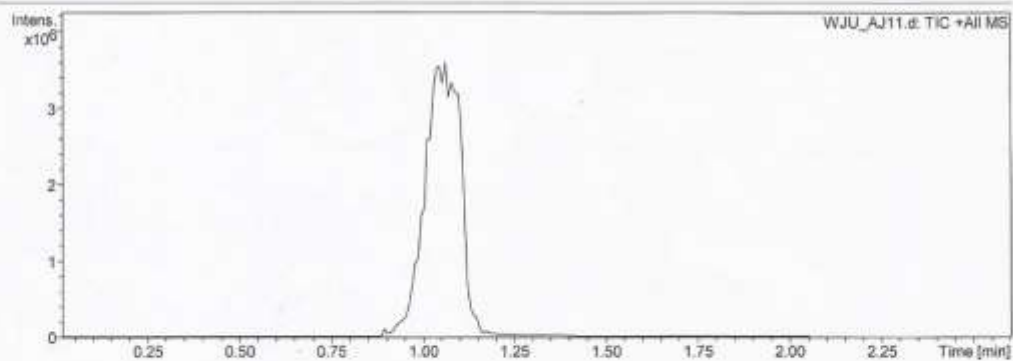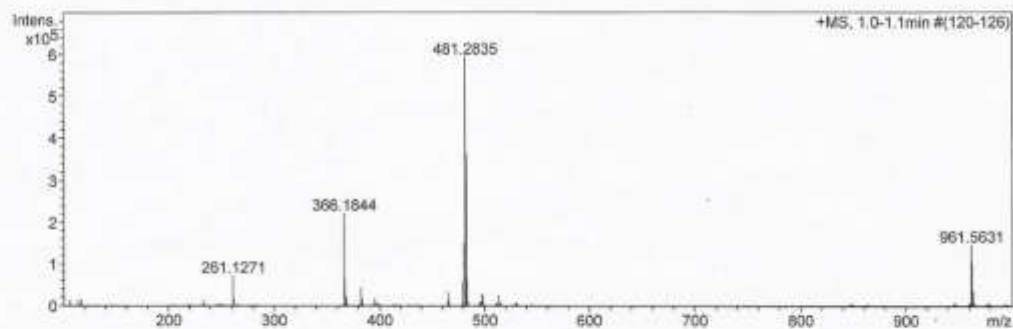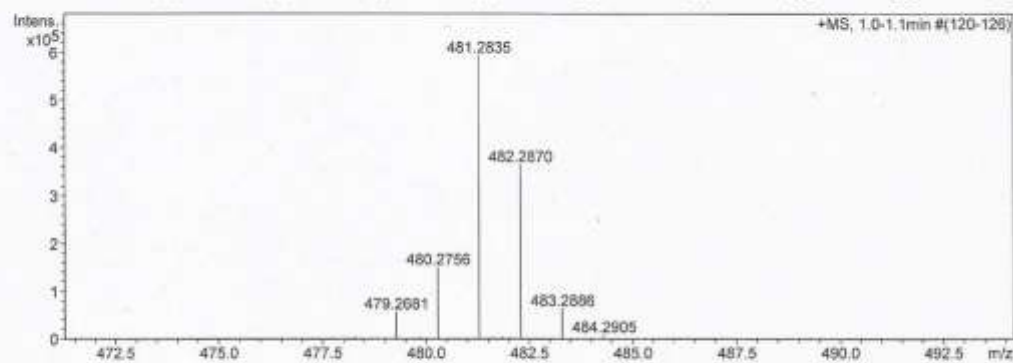



### Mass Spectrum SmartFormula Report

|                      |                                                           |                   |                      |
|----------------------|-----------------------------------------------------------|-------------------|----------------------|
| <b>Analysis Info</b> |                                                           | Acquisition Date  | 9/4/2012 11:44:15 AM |
| Analysis Name        | E:\Meiners\12_09WJU_AJ11.d                                | Operator          | Sender               |
| Method               | APCI_directprobe_positiv.m                                | Instrument / Ser# | micrOTOF-Q II 10252  |
| Sample Name          | AJ11                                                      |                   |                      |
| Comment              | Junker<br>APCI-Direkt<br>Kalibration mit Fettsaeureestern |                   |                      |

|                              |            |                       |           |                  |           |
|------------------------------|------------|-----------------------|-----------|------------------|-----------|
| <b>Acquisition Parameter</b> |            |                       |           |                  |           |
| Source Type                  | APCI       | Ion Polarity          | Positive  | Set Nebulizer    | 0.7 Bar   |
| Focus                        | Not active | Set Capillary         | 4000 V    | Set Dry Heater   | 200 °C    |
| Scan Begin                   | 100 m/z    | Set End Plate Offset  | -500 V    | Set Dry Gas      | 3.0 l/min |
| Scan End                     | 1000 m/z   | Set Collision Cell RF | 130.0 Vpp | Set Divert Valve | Waste     |

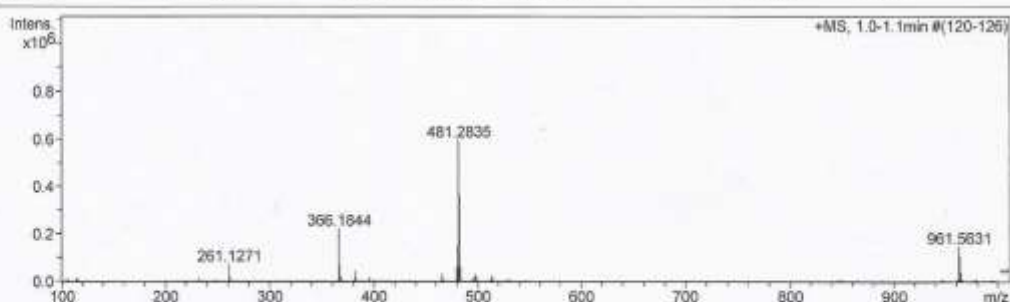

| Meas. m/z | #  | Formula                                                        | Score  | m/z      | err [mDa] | err [ppm] | mSigma | rdb  | e <sup>-</sup> | Conf | N-Rule |
|-----------|----|----------------------------------------------------------------|--------|----------|-----------|-----------|--------|------|----------------|------|--------|
| 481.2835  | 1  | C <sub>32</sub> H <sub>37</sub> N <sub>2</sub> O <sub>2</sub>  | 100.00 | 481.2850 | 1.5       | 3.1       | 128.7  | 15.5 | even           |      | ok     |
|           | 2  | C <sub>28</sub> H <sub>33</sub> N <sub>8</sub>                 | 59.81  | 481.2823 | -1.2      | -2.5      | 140.4  | 16.5 | even           |      | ok     |
|           | 3  | C <sub>27</sub> H <sub>37</sub> N <sub>4</sub> O <sub>4</sub>  | 10.10  | 481.2809 | -2.5      | -5.3      | 152.7  | 11.5 | even           |      | ok     |
|           | 4  | C <sub>26</sub> H <sub>41</sub> O <sub>8</sub>                 | 1.11   | 481.2796 | -3.9      | -8.0      | 165.0  | 6.5  | even           |      | ok     |
|           | 5  | C <sub>20</sub> H <sub>41</sub> N <sub>4</sub> O <sub>9</sub>  | 0.29   | 481.2868 | 3.3       | 6.9       | 190.6  | 2.5  | even           |      | ok     |
|           | 6  | C <sub>21</sub> H <sub>37</sub> N <sub>8</sub> O <sub>5</sub>  | 0.02   | 481.2881 | 4.7       | 9.7       | 206.0  | 7.5  | even           |      | ok     |
|           | 7  | C <sub>17</sub> H <sub>33</sub> N <sub>14</sub> O <sub>3</sub> | 0.08   | 481.2855 | 2.0       | 4.1       | 219.3  | 8.5  | even           |      | ok     |
|           | 8  | C <sub>16</sub> H <sub>37</sub> N <sub>10</sub> O <sub>7</sub> | 0.05   | 481.2841 | 0.7       | 1.4       | 233.3  | 3.5  | even           |      | ok     |
|           | 9  | C <sub>13</sub> H <sub>29</sub> N <sub>20</sub> O              | 0.04   | 481.2828 | -0.7      | -1.4      | 234.9  | 9.5  | even           |      | ok     |
|           | 10 | C <sub>12</sub> H <sub>33</sub> N <sub>16</sub> O <sub>5</sub> | 0.01   | 481.2814 | -2.0      | -4.2      | 246.5  | 4.5  | even           |      | ok     |

2-(4-Hydroxyphenyl)-N-{4-[N-methyl-N-(tetrahydro-2H-pyran-4-yl)aminomethyl]phenyl}-6,7-dihydro-5H-benzo[7]annulene-8-carboxamide (**2b**)

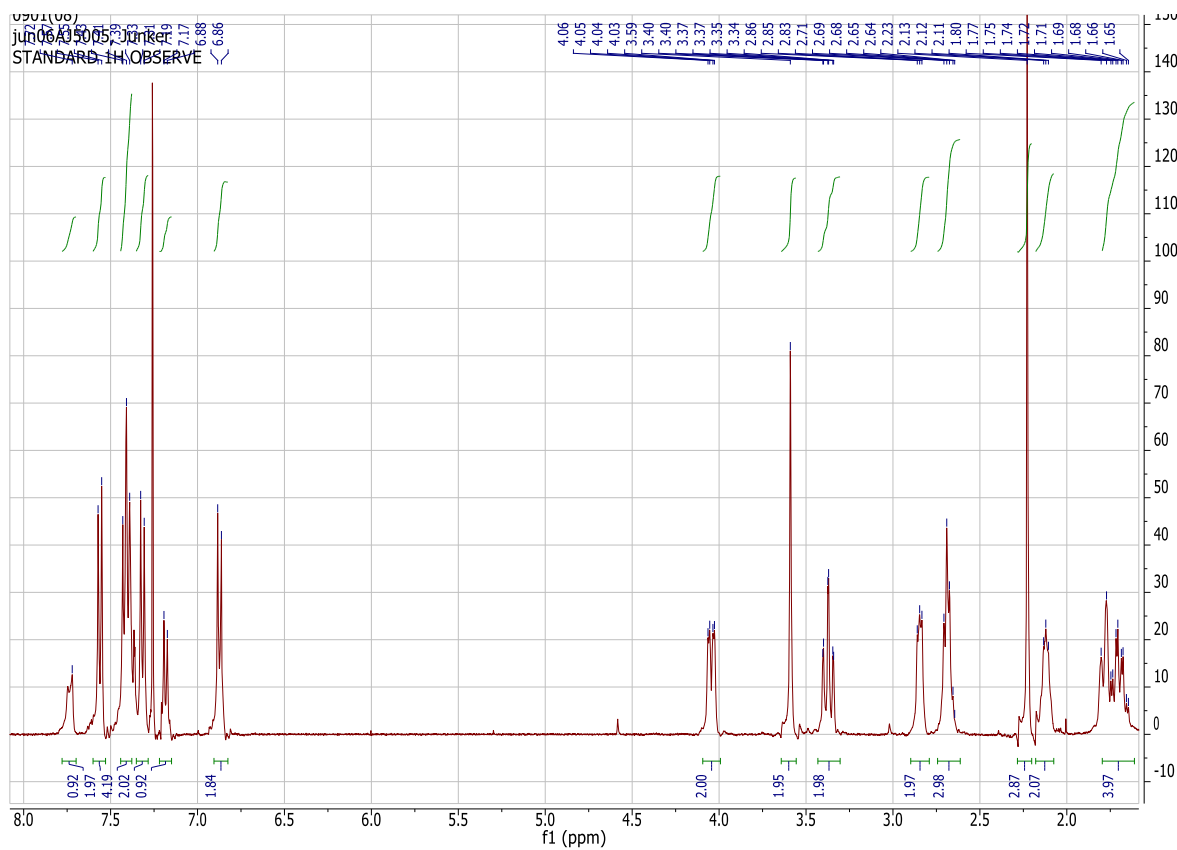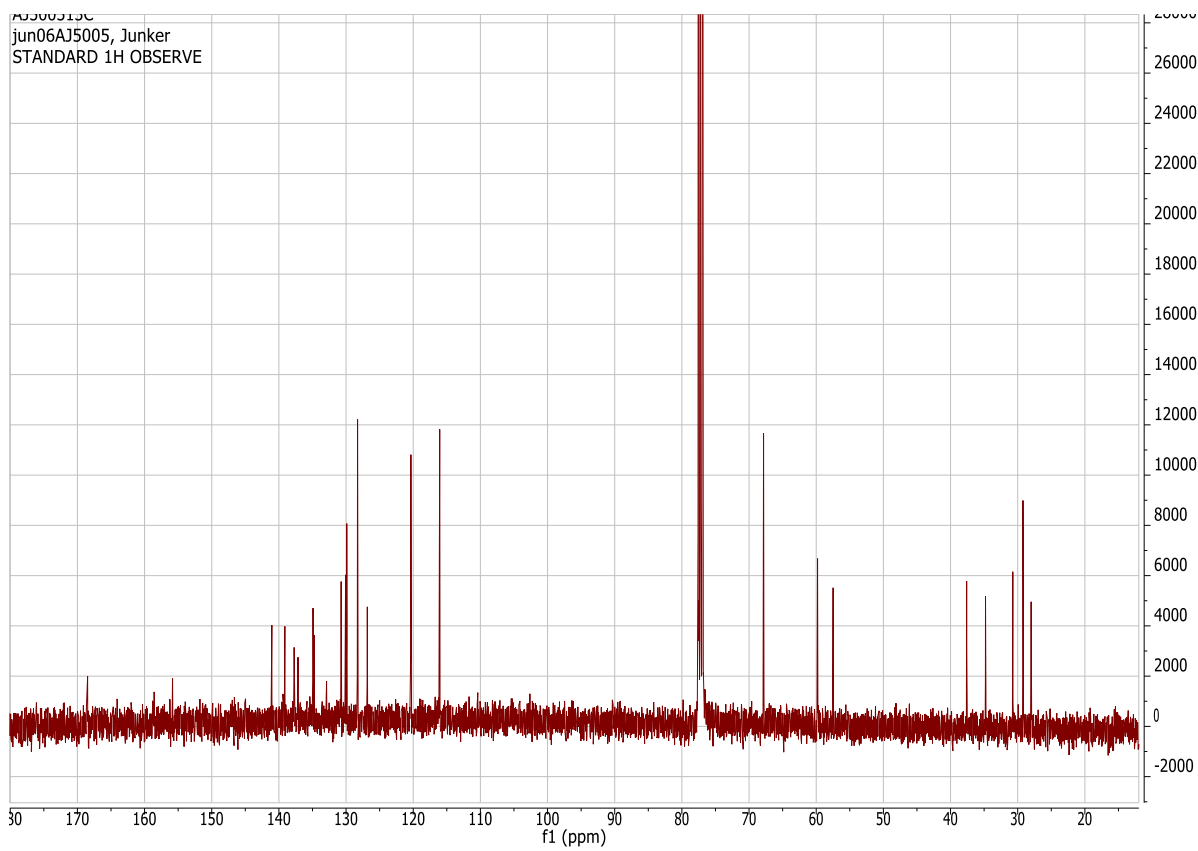

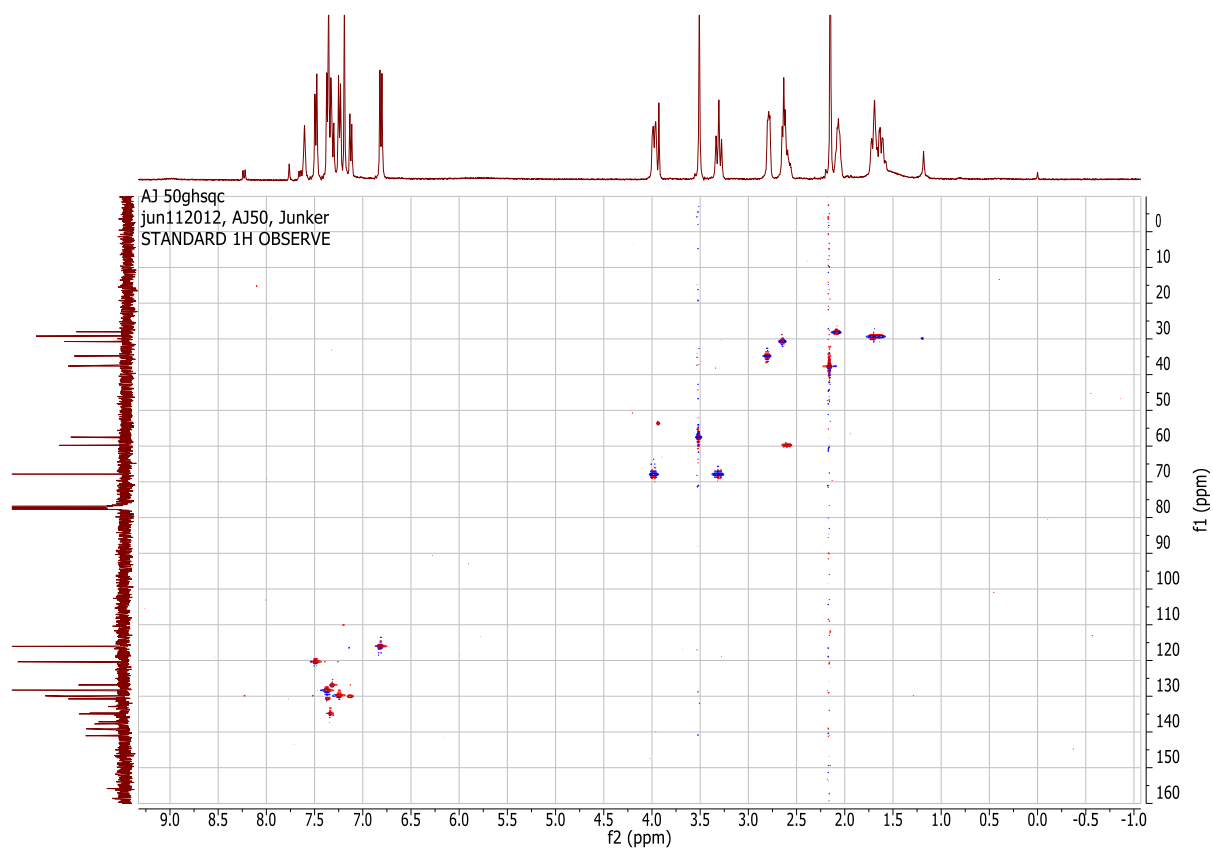

## HPLC

Analyzed: 22.06.11 01:18

Reported: 22.06.11 11:32

Processed: 22.06.11 11:32

Data Path: D:\WIN32APP\HSM\Chromni\DATA\3219\

Application: Chromni

Series:3219

Sample Name: AJ5005

Vial Number: 17

Injection from this vial: 1 of 1

Vial Type: UNK

Volume: 5,0 ul

Chrom Type: HPLC Channel : 1

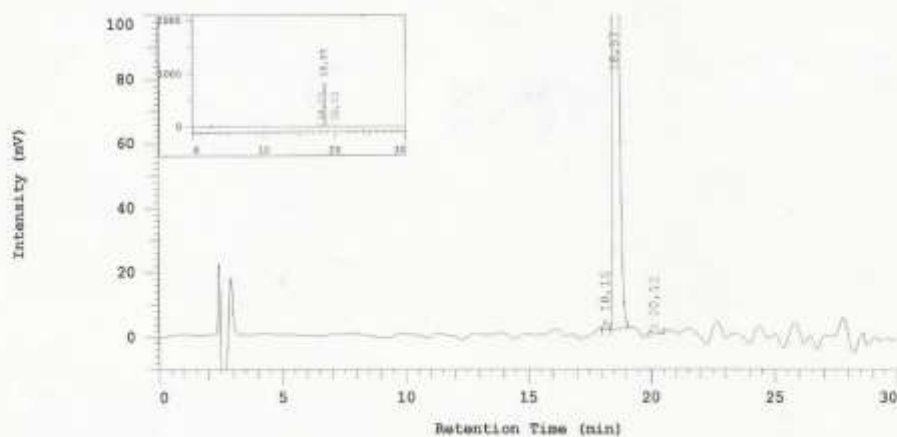

Acquisition Method: Chromni

Blank Subtr Sample Name: ACN

Column Type: 010

Solvent A: Wasser + 0,05%TFA

Developed by: Jens

Solvent B: ACN + 0,05%TFA

| No. | RT    | Area    | Conc 1  | BC |
|-----|-------|---------|---------|----|
| 1   | 18,15 | 23336   | 0,268   | BB |
| 2   | 18,57 | 8652428 | 99,290  | MC |
| 3   | 20,12 | 38556   | 0,442   | BB |
|     |       | 8714320 | 100,000 |    |

Peak rejection level: 0

## Generic Display Report

|                      |                                                                   |                  |                     |
|----------------------|-------------------------------------------------------------------|------------------|---------------------|
| <b>Analysis Info</b> |                                                                   | Acquisition Date | 9/9/2010 2:34:18 PM |
| Analysis Name        | D:\Data\PMCI\PharmChemie\Routine\2010_09\WJU_AJ5001.d             | Operator         | Meiners             |
| Method               | directprobe_default.m                                             | Instrument       | micrOTOF-Q II       |
| Sample Name          | AJ5001                                                            |                  |                     |
| Comment              | Junker<br>AJ5001<br>APCI-Direkt<br>Kalibration mit Fettsäureester |                  |                     |

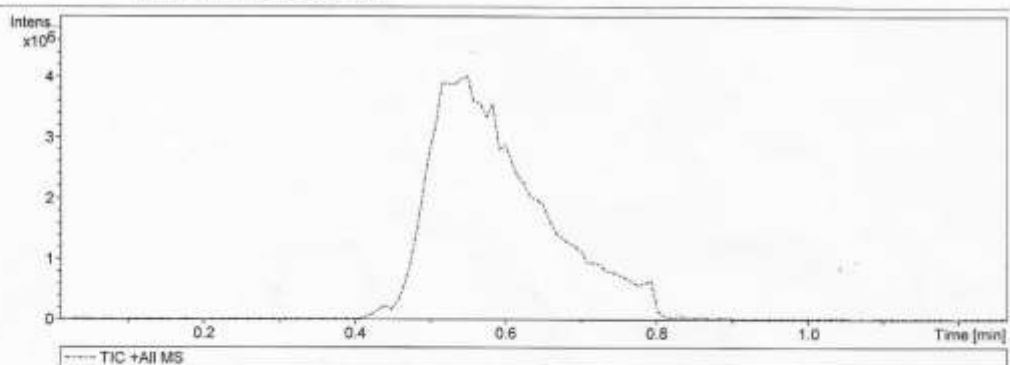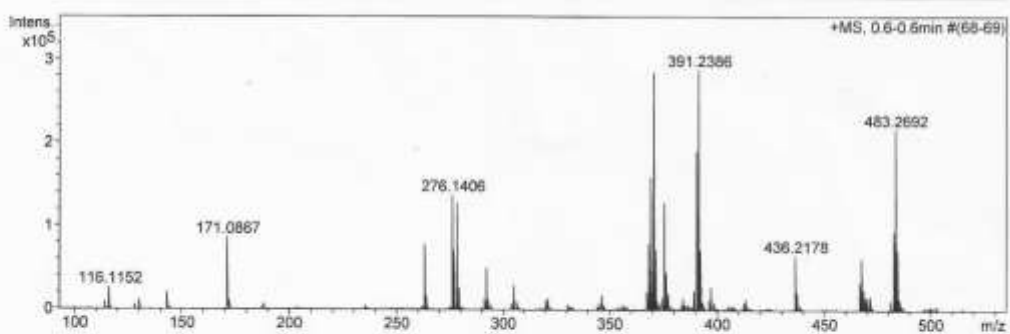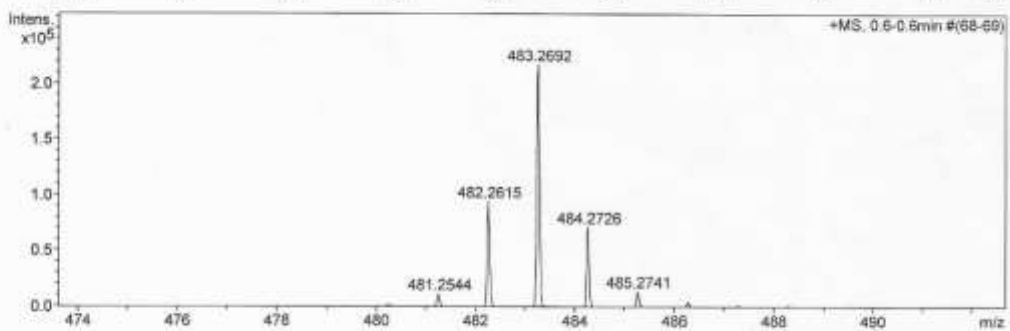

## Mass Spectrum SmartFormula Report

|                      |                                                           |                   |                      |
|----------------------|-----------------------------------------------------------|-------------------|----------------------|
| <b>Analysis Info</b> |                                                           | Acquisition Date  | 9/11/2012 9:50:15 AM |
| Analysis Name        | D:\Data\PMc\PharmChemie\Routine\APCI\12_09\WJU_AJ50.d     | Operator          | Sendker              |
| Method               | APCI_directprobe_positiv.m                                | Instrument / Ser# | micrOTOF-Q II 10252  |
| Sample Name          | AJ50                                                      |                   |                      |
| Comment              | Junker<br>APCI-Direkt<br>Kalibratinn mit Fettsaeureestern |                   |                      |

### Acquisition Parameter

|             |            |                       |           |                  |           |
|-------------|------------|-----------------------|-----------|------------------|-----------|
| Source Type | APCI       | Ion Polarity          | Positive  | Set Nebulizer    | 0.7 Bar   |
| Focus       | Not active | Set Capillary         | 4000 V    | Set Dry Heater   | 200 °C    |
| Scan Begin  | 100 m/z    | Set End Plate Offset  | -500 V    | Set Dry Gas      | 3.0 l/min |
| Scan End    | 1000 m/z   | Set Collision Cell RF | 130.0 Vpp | Set Divert Valve | Waste     |

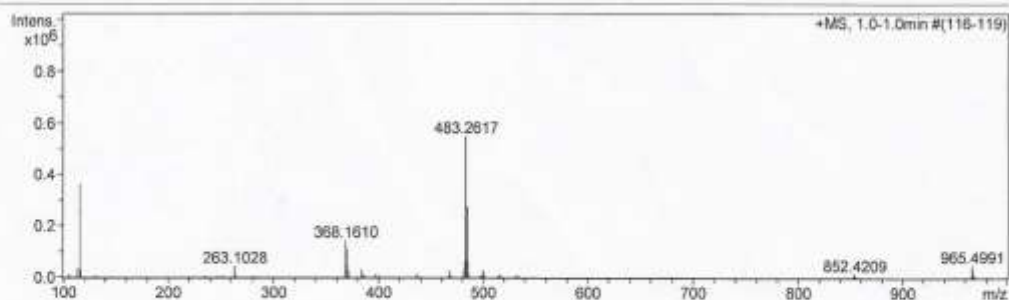

| Meas. m/z | # | Formula            | Score  | m/z      | err [mDa] | err [ppm] | mSigma | rdb  | e <sup>-</sup> Conf | N-Rule |
|-----------|---|--------------------|--------|----------|-----------|-----------|--------|------|---------------------|--------|
| 483.2617  | 1 | C 31 H 35 N 2 O 3  | 37.33  | 483.2642 | 2.5       | 5.2       | 81.3   | 15.5 | even                | ok     |
|           | 2 | C 27 H 31 N 8 O    | 100.00 | 483.2615 | -0.2      | -0.3      | 93.7   | 16.5 | even                | ok     |
|           | 3 | C 25 H 39 O 9      | 5.26   | 483.2580 | -2.8      | -5.8      | 117.2  | 6.5  | even                | ok     |
|           | 4 | C 26 H 35 N 4 O 5  | 12.23  | 483.2602 | -1.5      | -3.1      | 121.2  | 11.5 | even                | ok     |
|           | 5 | C 16 H 31 N 14 O 4 | 0.23   | 483.2647 | 3.0       | 6.3       | 164.5  | 8.5  | even                | ok     |
|           | 6 | C 15 H 35 N 10 O 8 | 0.26   | 483.2634 | 1.7       | 3.5       | 177.9  | 3.5  | even                | ok     |
|           | 7 | C 12 H 27 N 20 O 2 | 0.48   | 483.2620 | 0.4       | 0.7       | 179.9  | 9.5  | even                | ok     |
|           | 8 | C 11 H 31 N 16 O 6 | 0.14   | 483.2607 | -1.0      | -2.0      | 191.3  | 4.5  | even                | ok     |
|           | 9 | C 8 H 23 N 26      | 0.05   | 483.2594 | -2.3      | -4.8      | 193.0  | 10.5 | even                | ok     |

2-(4-Formylphenyl)-N-{4-[N-methyl-N-(tetrahydro-2H-pyran-4-yl)aminomethyl]phenyl}-6,7-dihydro-5H-benzo[7]annulene-8-carboxamide (**2c**)

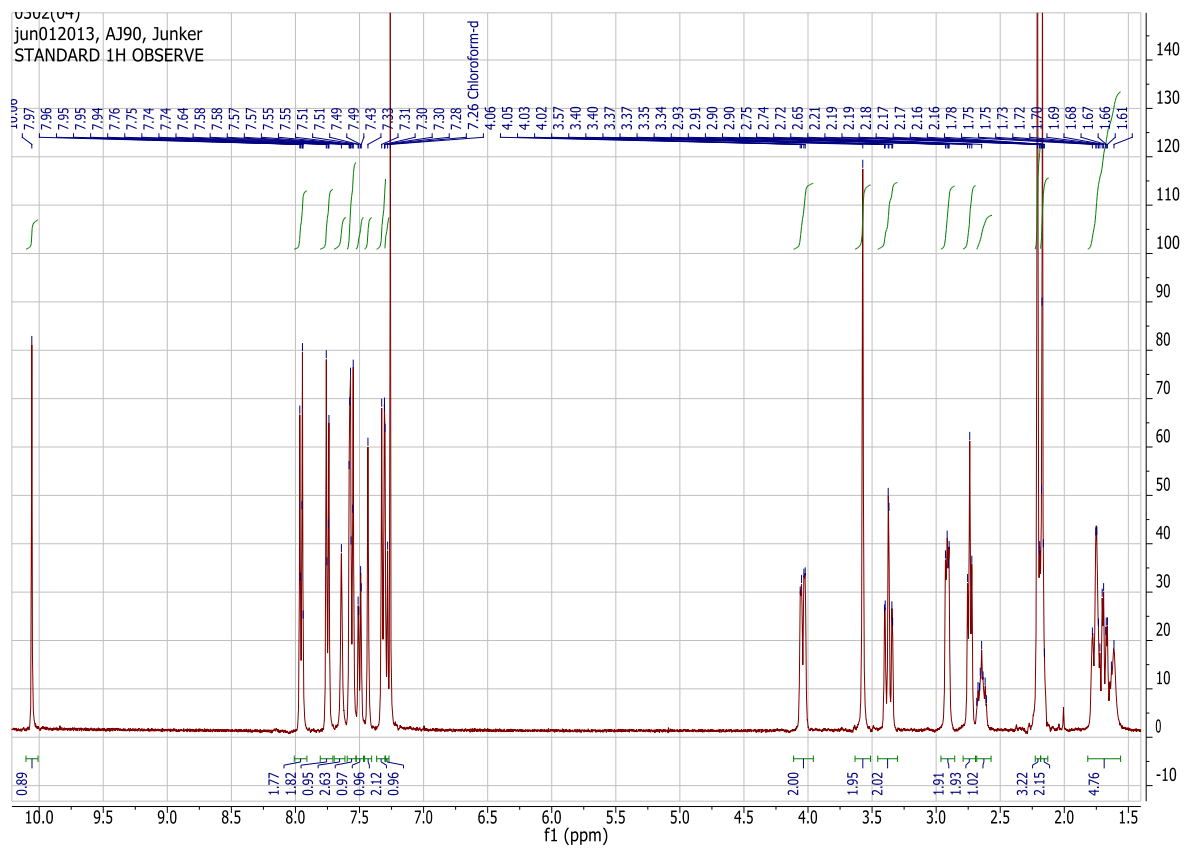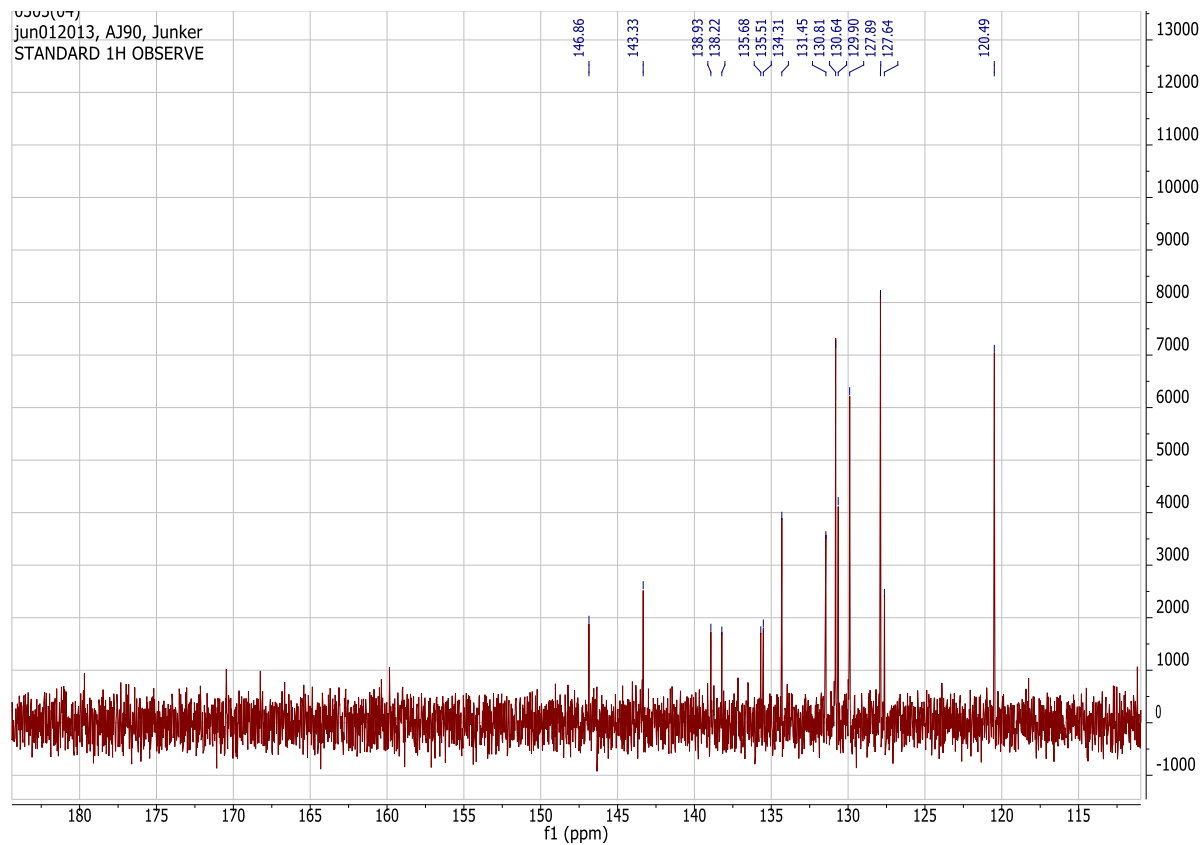

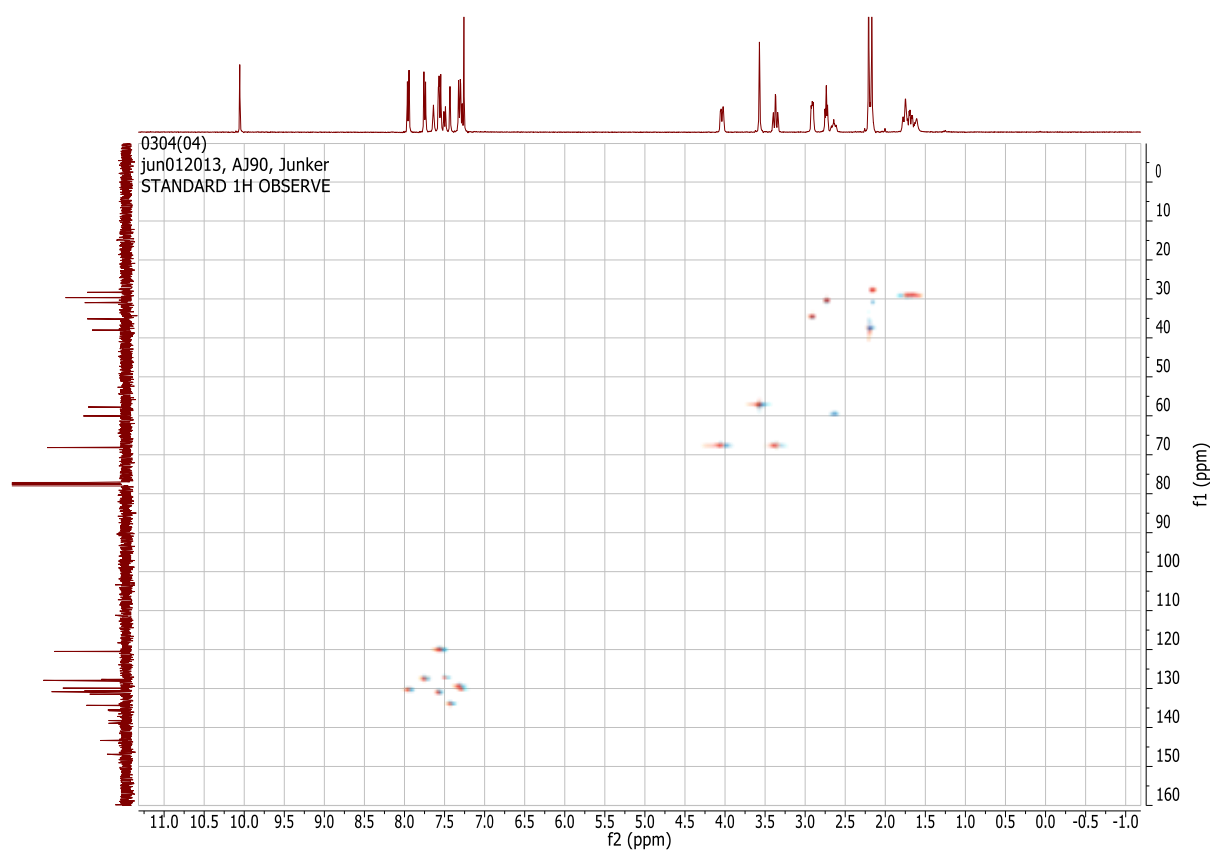



## HPLC

Analyzed: 24.01.13 05:12

Reported: 25.01.13 10:17

Processed: 25.01.13 10:17

Data Path: D:\WIN32APP\HSM\Chromni\DATA\5855\

Application: Chromni

Series: 5855

**Sample Name: AJ90**

Vial Number: 14

Injection from this vial: 1 of 1

Vial Type: UNK

Volume: 5,0 uI

Chrom Type: HPLC Channel : 1

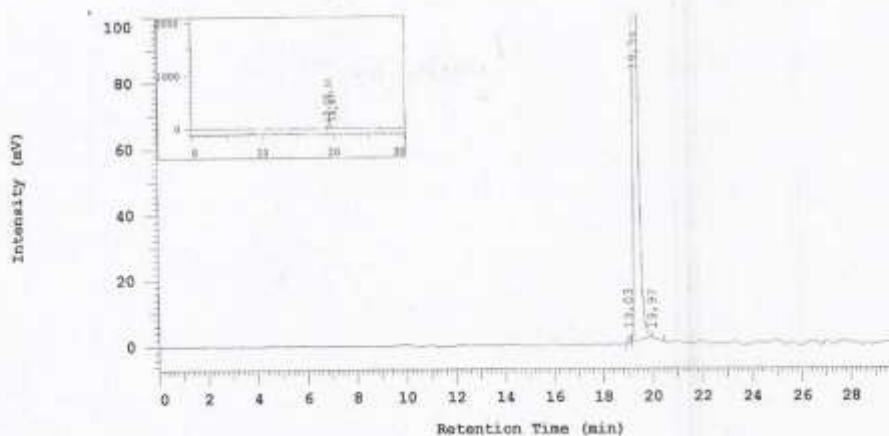

Acquisition Method: Chromni

Blank Subtr Sample Name: ACN

Column Type: 010

Solvent A: Wasser + 0,05%TFA

Developed by: Jens

Solvent B: ACN + 0,05%TPA

| No. | RT    | Area    | Conc 1  | BC |
|-----|-------|---------|---------|----|
| 1   | 19,03 | 13347   | 0,423   | MC |
| 2   | 19,34 | 3140548 | 99,577  | MC |
| 3   | 19,97 | 0       | 0,000   |    |
|     |       | 3153895 | 100,000 |    |

Peak rejection level: 0

## Generic Display Report

### Analysis Info

Analysis Name \\p2-ms\PI\Pharm\Chemie\Routine\APCI\12\_08\WJU\_AJ9001.d  
Method APCI\_directprobe\_positiv.m  
Sample Name AJ9001  
Comment Junker  
APCI-Direkt  
Kalibration mit Fettsaeureestern

Acquisition Date 02.08.2012 11:45:51

Operator Meiners  
Instrument micrOTOF-Q II

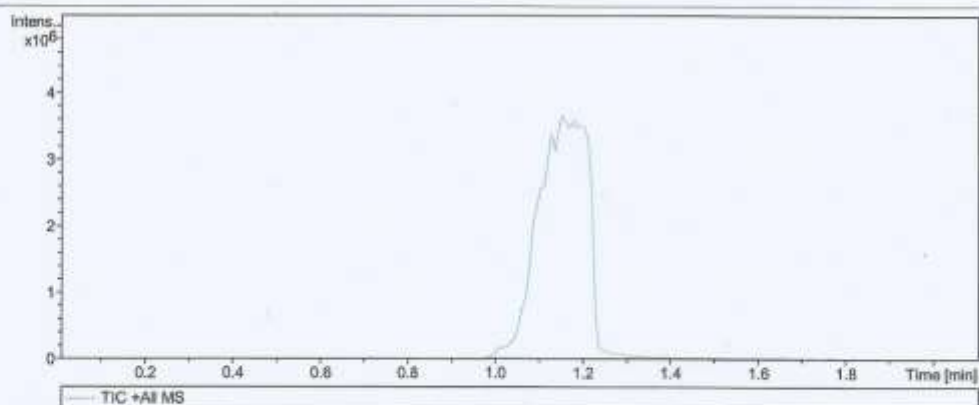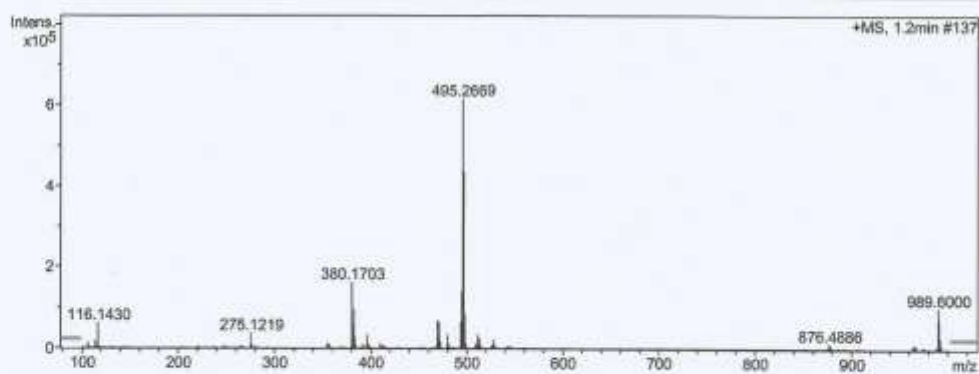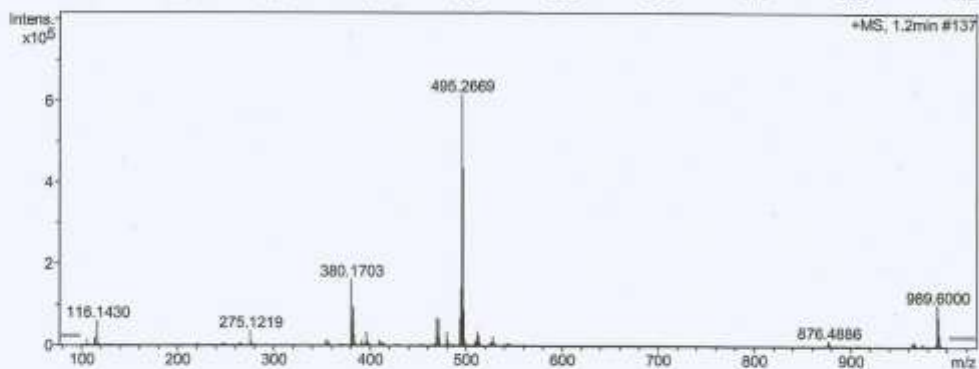

## Mass Spectrum SmartFormula Report

### Analysis Info

|               |                                                           |                   |                     |
|---------------|-----------------------------------------------------------|-------------------|---------------------|
| Analysis Name | \p2-ms\PZ\PharmChemie\Routine\APCI\12_08\WJU_AJ9001.d     | Acquisition Date  | 02.08.2012 11:45:51 |
| Method        | APCI_directprobe_positiv.m                                | Operator          | Meiners             |
| Sample Name   | AJ9001                                                    | Instrument / Ser# | micrOTOF-Q II 10252 |
| Comment       | Junker<br>APCI-Direkt<br>Kalibration mit Fettsaeureestern |                   |                     |

### Acquisition Parameter

|             |            |                       |           |                  |           |
|-------------|------------|-----------------------|-----------|------------------|-----------|
| Source Type | APCI       | Ion Polarity          | Positive  | Set Nebulizer    | 0.7 Bar   |
| Focus       | Not active | Set Capillary         | 4000 V    | Set Dry Heater   | 200 °C    |
| Scan Begin  | 100 m/z    | Set End Plate Offset  | -500 V    | Set Dry Gas      | 3.0 l/min |
| Scan End    | 1000 m/z   | Set Collision Cell RF | 130.0 Vpp | Set Divert Valve | Waste     |

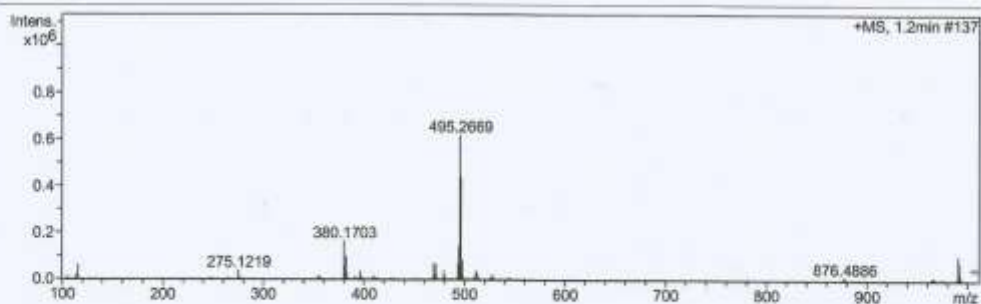

| Meas. m/z | # | Formula                                                         | Score  | m/z      | err (mDa) | err (ppm) | mSigma | rdb  | e <sup>-</sup> Conf | N-Rule |
|-----------|---|-----------------------------------------------------------------|--------|----------|-----------|-----------|--------|------|---------------------|--------|
| 471.1490  | 1 | C <sub>19</sub> H <sub>15</sub> N <sub>14</sub> O <sub>2</sub>  | 100.00 | 471.1497 | 0.7       | 1.4       | 5.3    | 19.5 | even                | ok     |
|           | 2 | C <sub>21</sub> H <sub>27</sub> O <sub>12</sub>                 | 86.12  | 471.1497 | 0.7       | 1.4       | 13.2   | 8.5  | even                | ok     |
|           | 3 | C <sub>18</sub> H <sub>19</sub> N <sub>10</sub> O <sub>6</sub>  | 82.63  | 471.1484 | -0.7      | -1.4      | 15.3   | 14.5 | even                | ok     |
| 495.2669  | 1 | C <sub>37</sub> H <sub>35</sub> O                               | 100.00 | 495.2682 | 1.3       | 2.6       | 153.3  | 20.5 | even                | ok     |
|           | 2 | C <sub>32</sub> H <sub>35</sub> N <sub>2</sub> O <sub>3</sub>   | 6.02   | 495.2642 | -2.7      | -5.5      | 177.3  | 16.5 | even                | ok     |
|           | 3 | C <sub>20</sub> H <sub>39</sub> N <sub>4</sub> O <sub>10</sub>  | 0.12   | 495.2661 | -0.9      | -1.8      | 237.3  | 3.5  | even                | ok     |
|           | 4 | C <sub>22</sub> H <sub>31</sub> N <sub>12</sub> O <sub>2</sub>  | 0.02   | 495.2687 | 1.8       | 3.6       | 248.2  | 13.5 | even                | ok     |
|           | 5 | C <sub>21</sub> H <sub>35</sub> N <sub>8</sub> O <sub>6</sub>   | 0.01   | 495.2674 | 0.5       | 0.9       | 262.1  | 8.5  | even                | ok     |
|           | 6 | C <sub>18</sub> H <sub>27</sub> N <sub>18</sub>                 | 0.01   | 495.2661 | -0.9      | -1.8      | 263.6  | 14.5 | even                | ok     |
|           | 7 | C <sub>17</sub> H <sub>31</sub> N <sub>14</sub> O <sub>4</sub>  | 0.00   | 495.2647 | -2.2      | -4.5      | 275.5  | 9.5  | even                | ok     |
| 496.2720  | 1 | C <sub>18</sub> H <sub>38</sub> N <sub>7</sub> O <sub>9</sub>   | 100.00 | 496.2726 | 0.5       | 1.1       | 17.9   | 3.5  | even                | ok     |
|           | 2 | C <sub>15</sub> H <sub>30</sub> N <sub>17</sub> O <sub>3</sub>  | 84.94  | 496.2712 | -0.8      | -1.6      | 19.0   | 9.5  | even                | ok     |
| 512.2656  | 1 | C <sub>29</sub> H <sub>38</sub> N <sub>7</sub> O                | 49.77  | 512.2643 | -1.5      | -3.0      | 12.9   | 11.5 | even                | ok     |
|           | 2 | C <sub>30</sub> H <sub>34</sub> N <sub>5</sub> O <sub>3</sub>   | 100.00 | 512.2656 | -0.2      | -0.4      | 14.7   | 16.5 | even                | ok     |
| 877.4908  | 1 | C <sub>28</sub> H <sub>65</sub> N <sub>18</sub> O <sub>14</sub> | 54.43  | 877.4922 | 1.4       | 1.6       | 13.0   | 5.5  | even                | ok     |
|           | 2 | C <sub>26</sub> H <sub>53</sub> N <sub>32</sub> O <sub>4</sub>  | 54.48  | 877.4922 | 1.4       | 1.6       | 13.3   | 16.5 | even                | ok     |
|           | 3 | C <sub>25</sub> H <sub>57</sub> N <sub>28</sub> O <sub>8</sub>  | 100.00 | 877.4909 | 0.1       | 0.1       | 17.9   | 11.5 | even                | ok     |
| 965.4775  | 1 | C <sub>39</sub> H <sub>69</sub> N <sub>10</sub> O <sub>18</sub> | 75.63  | 965.4786 | 1.1       | 1.1       | 16.1   | 10.5 | even                | ok     |
|           | 2 | C <sub>37</sub> H <sub>57</sub> N <sub>24</sub> O <sub>8</sub>  | 73.37  | 965.4786 | 1.0       | 1.1       | 17.9   | 21.5 | even                | ok     |
| 989.6000  | 1 | C <sub>60</sub> H <sub>77</sub> N <sub>8</sub> O <sub>5</sub>   | 74.67  | 989.6011 | 1.2       | 1.2       | 13.7   | 28.5 | even                | ok     |

Methyl 4-[8-(N-{4-[N-methyl-N-(tetrahydro-2H-pyran-4-yl)aminomethyl]phenyl}carbamoyl)-6,7-dihydro-5H-benzo[7]annulen-2-yl]benzoate (**2d**)

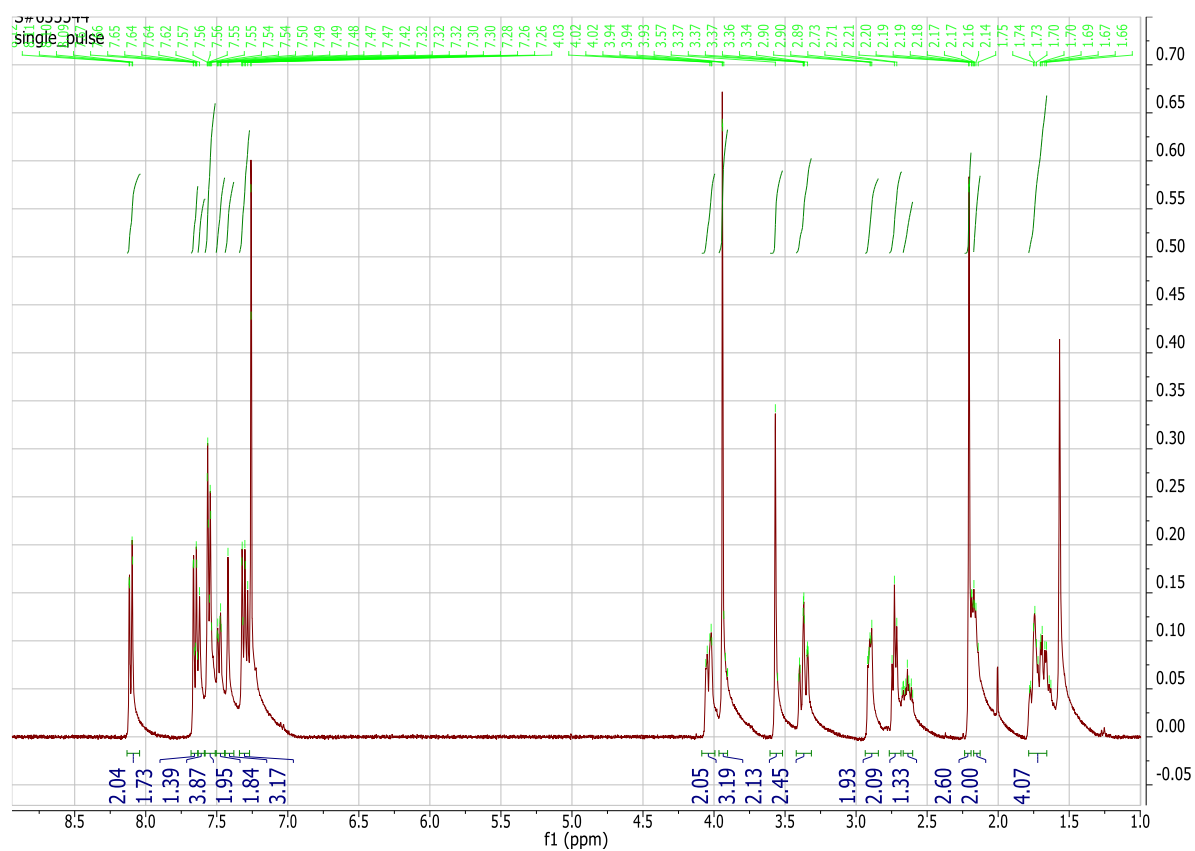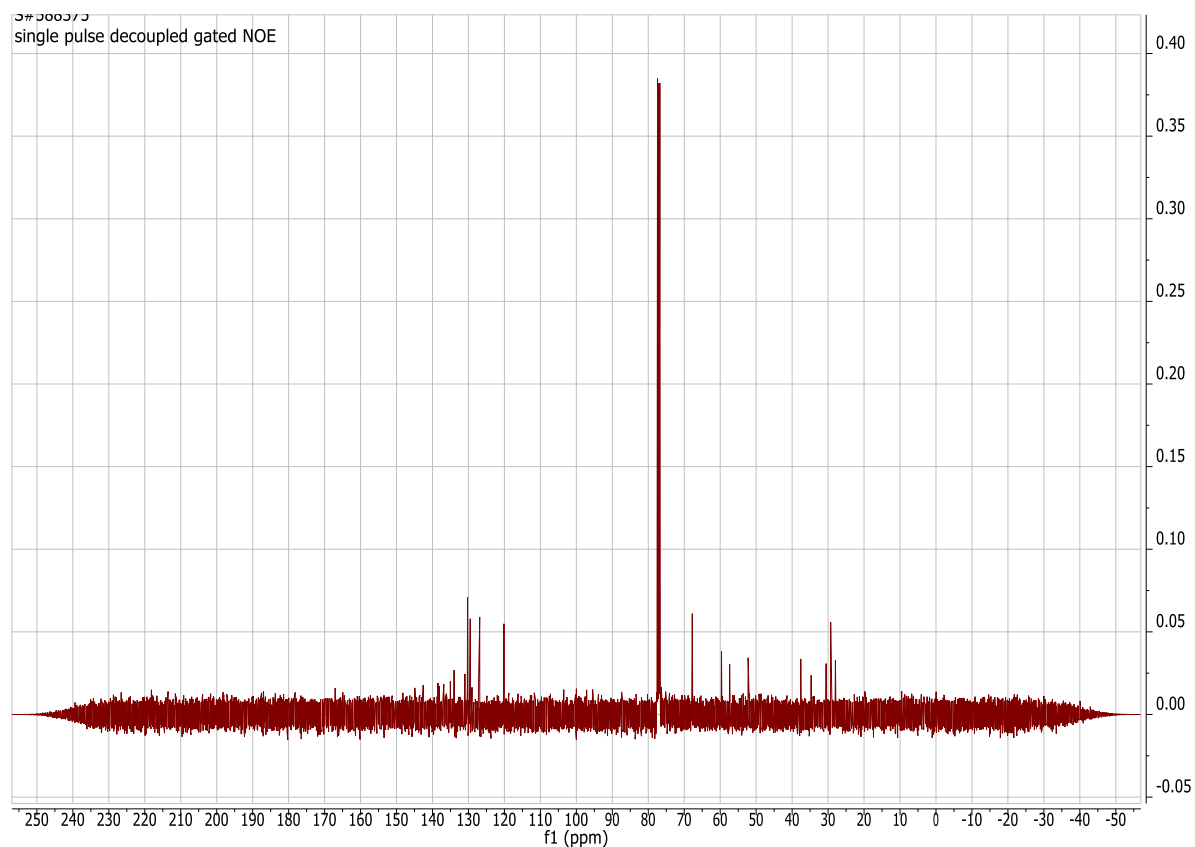

## HPLC

Analyzed: 20.09.12 07:40

Reported: 21.09.12 08:58

Processed: 21.09.12 08:58

Data Path: D:\WIN32APP\HSM\Chromni\DATA\5281\

Application: Chromni

Series:5281

**Sample Name: AJ91A**

Vial Number: 20

Injection from this vial: 1 of 1

Vial Type: UNK

Volume: 5,0 ul

Chrom Type: HPLC Channel : 1

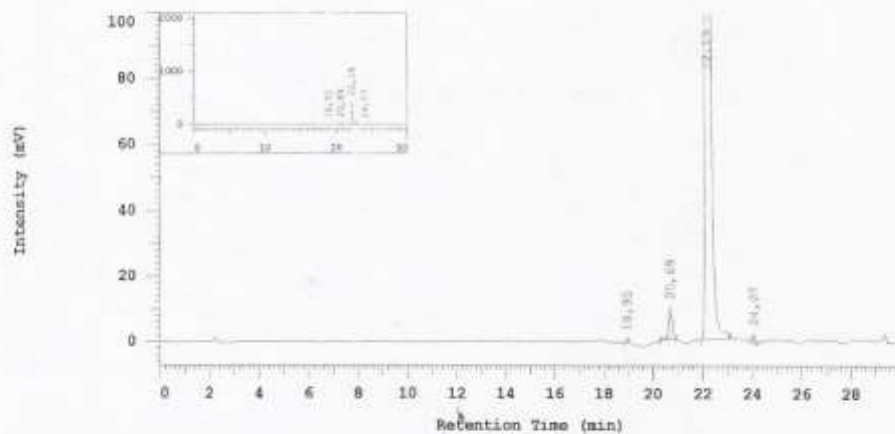

Acquisition Method: Chromni

Blank Subtr Sample Name: ACN

Column Type: 010

Solvent A: Wasser + 0,05%TFA

Developed by: Jens

Solvent B: ACN + 0,05%TFA

| No. | RT    | Area    | Conc 1  | BC |
|-----|-------|---------|---------|----|
| 1   | 18,95 | 7714    | 0,160   | BB |
| 2   | 20,69 | 89493   | 1,861   | BB |
| 3   | 22,19 | 4697648 | 97,695  | BB |
| 4   | 24,07 | 13635   | 0,284   | BB |
|     |       | 4808490 | 100,000 |    |

Peak rejection level: 0

## Generic Display Report

### Analysis Info

Analysis Name: \\p2-ms\PI\PharmChemie\Routine\APCI\12\_08\WJU\_AJ9101.d  
Method: APCI\_directprobe\_positiv.m  
Sample Name: AJ9101  
Comment: Junker  
APCI-Direkt  
Kalibration mit Fettsaeureestern

Acquisition Date: 02.08.2012 11:48:14

Operator: Meiners  
Instrument: micrOTOF-Q II

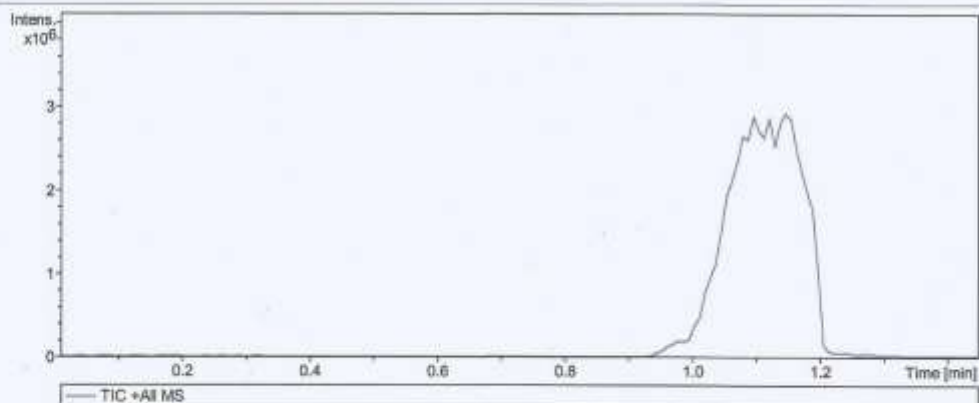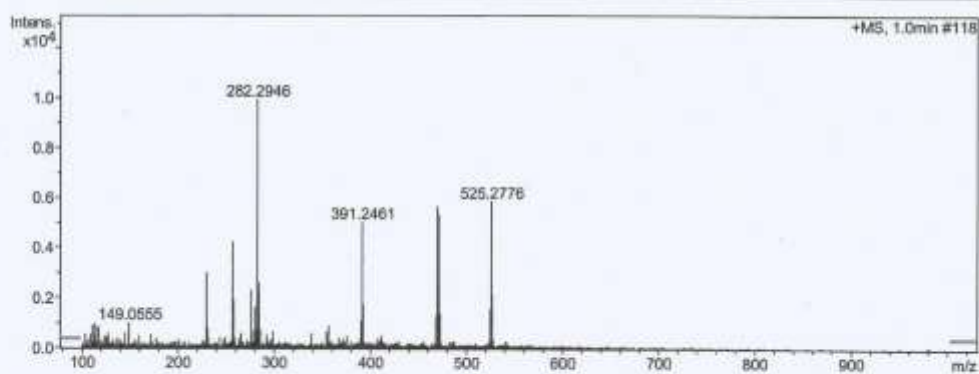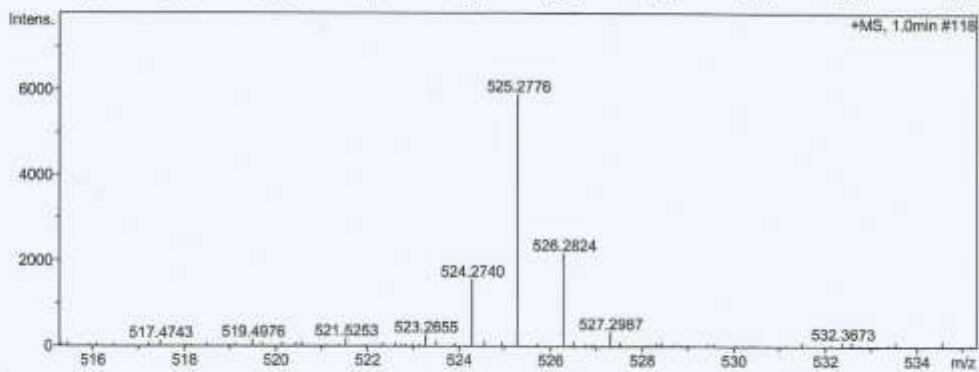

## Mass Spectrum SmartFormula Report

### Analysis Info

Analysis Name: \\p2-ms\PIZ\PharmChemie\Routine\APCI\12\_08\WJU\_AJ9101.d  
 Method: APCI\_directprobe\_positiv.m  
 Sample Name: AJ9101  
 Comment: Junker  
 APCI-Direkt  
 Kalibration mit Fettsaureestern

Acquisition Date: 02.08.2012 11:48:14  
 Operator: Meiners  
 Instrument / Ser#: micrOTOF-Q II 10252

### Acquisition Parameter

|             |            |                       |           |                  |           |
|-------------|------------|-----------------------|-----------|------------------|-----------|
| Source Type | APCI       | Ion Polarity          | Positive  | Set Nebulizer    | 0.7 Bar   |
| Focus       | Not active | Set Capillary         | 4000 V    | Set Dry Heater   | 200 °C    |
| Scan Begin  | 100 m/z    | Set End Plate Offset  | -500 V    | Set Dry Gas      | 3.0 l/min |
| Scan End    | 1000 m/z   | Set Collision Cell RF | 130.0 Vpp | Set Divert Valve | Waste     |

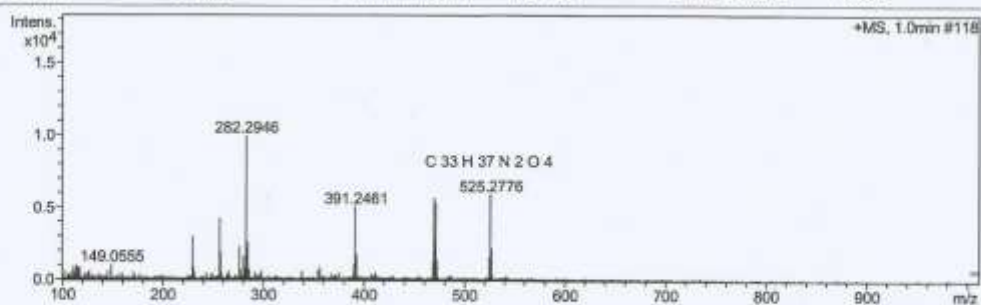

| Meas. m/z | # | Formula            | Score  | m/z      | err [mDa] | err [ppm] | mSigma | rdb  | e <sup>-</sup> | Conf | N-Rule |
|-----------|---|--------------------|--------|----------|-----------|-----------|--------|------|----------------|------|--------|
| 338.3535  | 1 | C 21 H 44 N 3      | 100.00 | 338.3530 | -0.5      | -1.5      | 16.3   | 1.5  | even           | ok   |        |
| 471.1496  | 1 | C 19 H 15 N 14 O 2 | 100.00 | 471.1497 | 0.1       | 0.2       | 4.3    | 19.5 | even           | ok   |        |
|           | 2 | C 22 H 23 N 4 O 8  | 48.81  | 471.1510 | 1.4       | 3.0       | 4.8    | 13.5 | even           | ok   |        |
|           | 3 | C 21 H 27 O 12     | 82.54  | 471.1497 | 0.1       | 0.2       | 14.5   | 8.5  | even           | ok   |        |
|           | 4 | C 18 H 19 N 10 O 8 | 44.25  | 471.1484 | -1.3      | -2.7      | 15.9   | 14.5 | even           | ok   |        |
| 525.2776  | 1 | C 33 H 37 N 2 O 4  | 100.00 | 525.2748 | -2.8      | -5.3      | 11.0   | 16.5 | even           | ok   |        |



2-[4-(Acetamido)phenyl]-N-{4-[N-methyl-N-(tetrahydro-2H-pyran-4-yl)aminomethyl]phenyl}-6,7-dihydro-5H-benzo[7]annulene-8-carboxamide (**2e**)

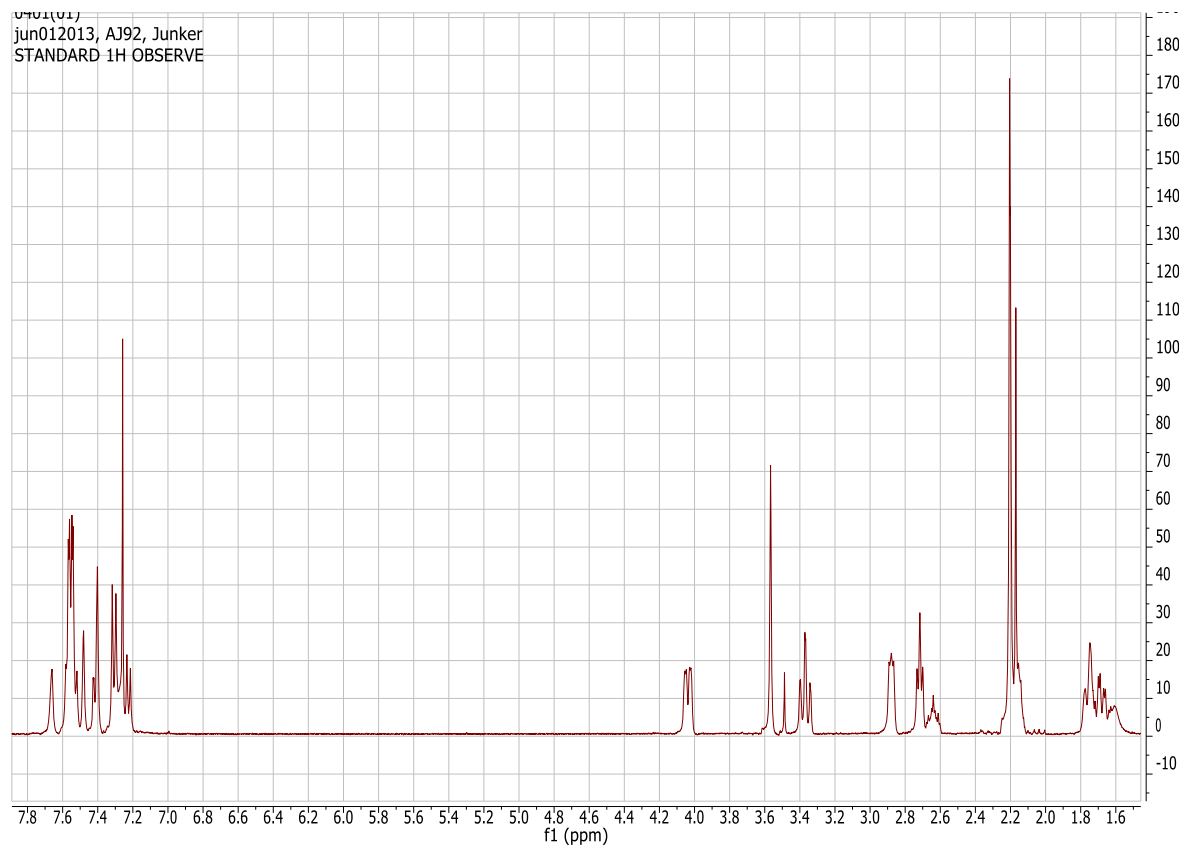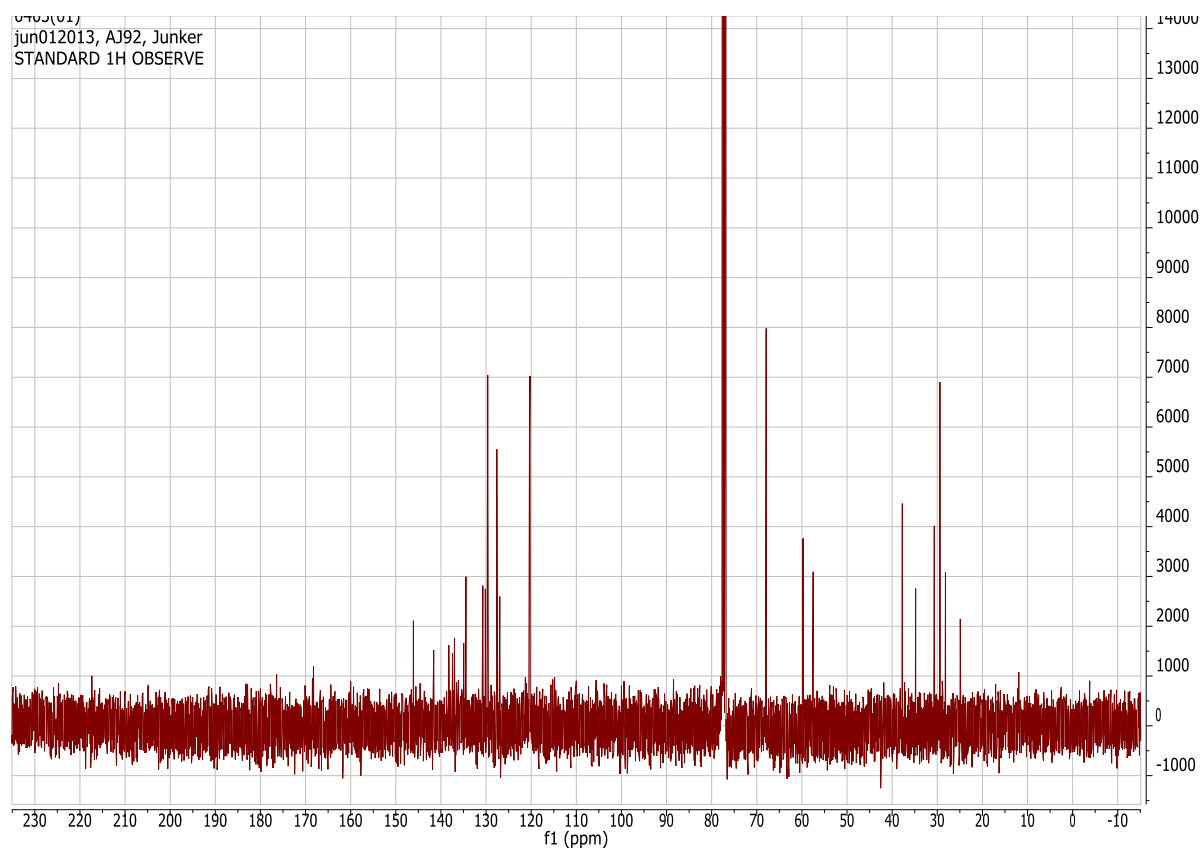



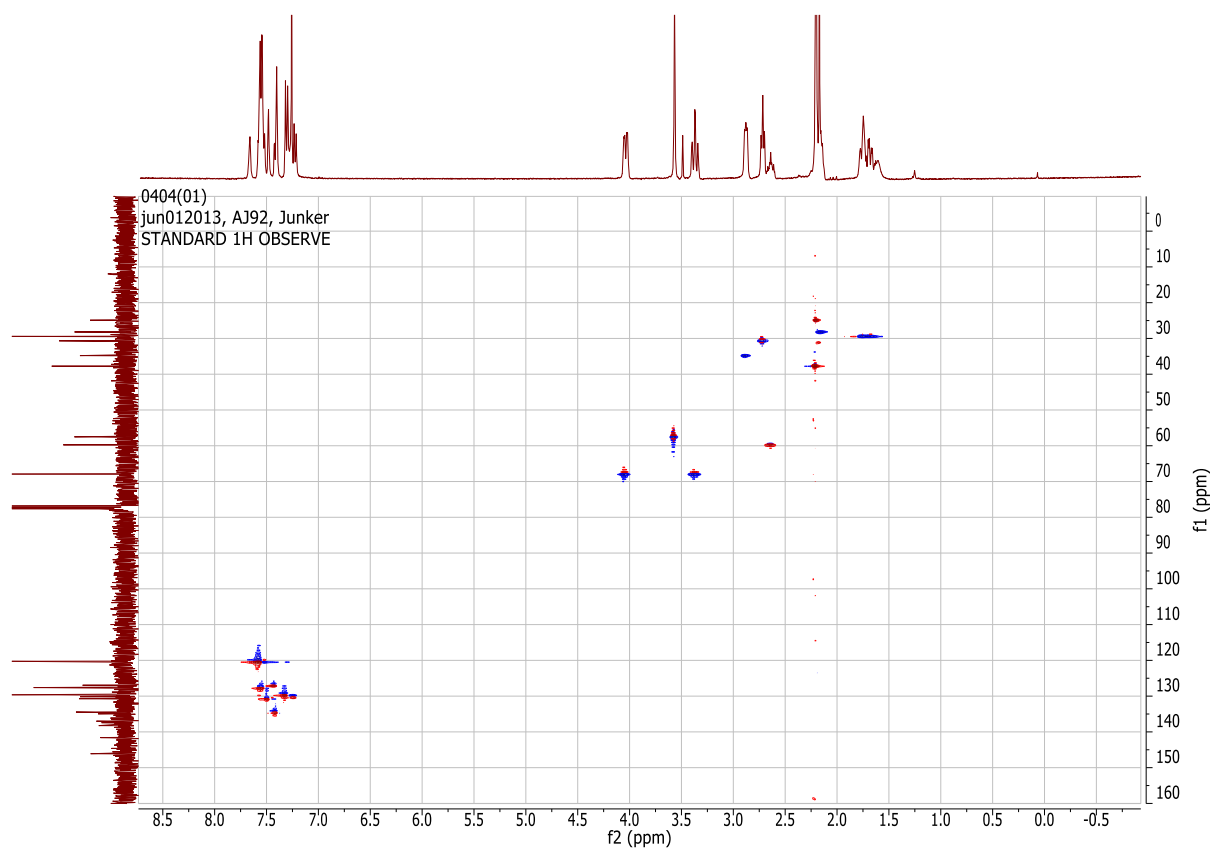

## HPLC

Analyzed: 05.07.12 08:11

Reported: 05.07.12 15:55

Processed: 05.07.12 15:55

Data Path: D:\WIN32APP\HSM\Chromni\DATA\4978\

Application: Chromni

Series:4978

**Sample Name: AJ9201**

Vial Number: 19

Injection from this vial: 1 of 1

Vial Type: UNK

Volume: 5,0 ul

Chrom Type: HPLC Channel : 1

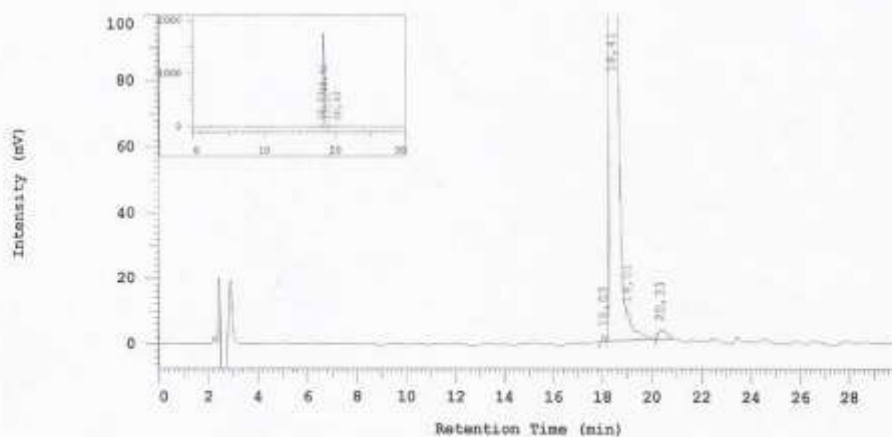

Acquisition Method: Chromni

Blank Subtr Sample Name: ACN

Column Type: 010

Solvent A: Wasser + 0,05%TFA

Developed by: Jens

Solvent B: ACN + 0,05%TFA

| No. | RT    | Area     | Conc 1  | BC |
|-----|-------|----------|---------|----|
| 1   | 18,03 | 14581    | 0,067   | BB |
| 2   | 18,41 | 21532304 | 98,900  | MC |
| 3   | 19,01 | 170567   | 0,783   | MC |
| 4   | 20,33 | 54233    | 0,249   | MC |
|     |       | 21771685 | 100,000 |    |

Peak rejection level: 0

## Generic Display Report

### Analysis Info

|               |                                                          |                  |                     |
|---------------|----------------------------------------------------------|------------------|---------------------|
| Analysis Name | \\pz-ms\PIZ\PharmChemie\Routine\APCI\12_08\WJU_AJ9201.d  | Acquisition Date | 02.08.2012 11:29:03 |
| Method        | APCI_directprobe_positiv.m                               | Operator         | Meiners             |
| Sample Name   | AJ9201                                                   | Instrument       | micrOTOF-Q II       |
| Comment       | Junker<br>APCI-Direkt<br>Kalibration mit Fettsaureestern |                  |                     |

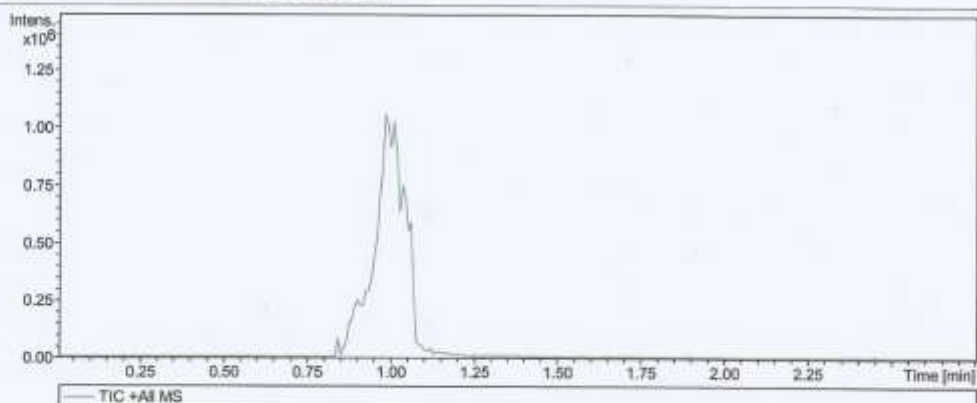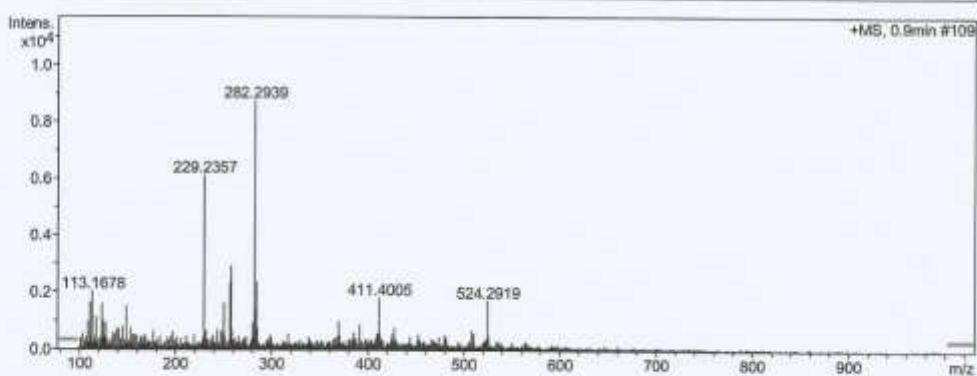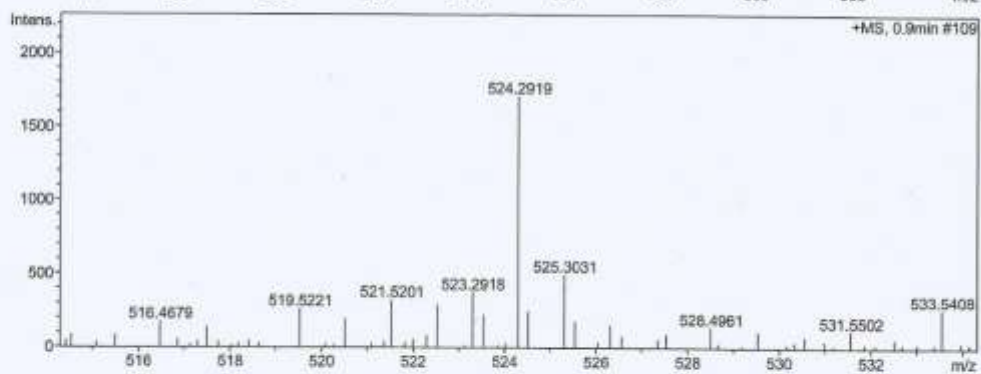

## Mass Spectrum SmartFormula Report

### Analysis Info

Analysis Name: \\p2-ms\PZ\PharmChemie\Routine\APCI\12\_08\WJU\_AJ8201.d  
Method: APCI\_directprobe\_positiv.m  
Sample Name: AJ8201  
Comment: Junker  
APCI-Direkt  
Kalibration mit Fettsaeureestern

Acquisition Date: 02.08.2012 11:29:03  
Operator: Meiners  
Instrument / Ser#: micrOTOF-Q II 10252

### Acquisition Parameter

|             |            |                       |           |                  |           |
|-------------|------------|-----------------------|-----------|------------------|-----------|
| Source Type | APCI       | Ion Polarity          | Positive  | Set Nebulizer    | 0.7 Bar   |
| Focus       | Not active | Set Capillary         | 4000 V    | Set Dry Heater   | 200 °C    |
| Scan Begin  | 100 m/z    | Set End Plate Offset  | -500 V    | Set Dry Gas      | 3.0 l/min |
| Scan End    | 1000 m/z   | Set Collision Cell RF | 130.0 Vpp | Set Divert Valve | Waste     |

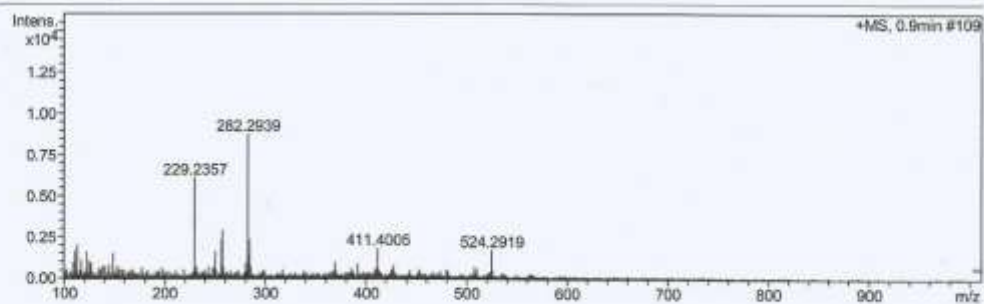

| Meas. m/z | # | Formula                                                        | Score  | m/z      | err [mDa] | err [ppm] | mSigma | rdb  | e <sup>-</sup> | Conf | N-Rule |
|-----------|---|----------------------------------------------------------------|--------|----------|-----------|-----------|--------|------|----------------|------|--------|
| 149.0578  | 1 | C <sub>9</sub> H <sub>9</sub> O <sub>2</sub>                   | 59.69  | 149.0597 | 2.0       | 13.1      | 17.3   | 5.5  | even           |      | ok     |
| 250.1090  | 1 | C <sub>13</sub> H <sub>16</sub> N <sub>4</sub> O <sub>4</sub>  | 56.41  | 250.1074 | -1.6      | -6.4      | 18.5   | 6.5  | even           |      | ok     |
| 524.2919  | 1 | C <sub>22</sub> H <sub>38</sub> N <sub>8</sub> O <sub>6</sub>  | 48.23  | 524.2940 | 2.1       | 4.0       | 23.2   | 8.5  | even           |      | ok     |
|           | 2 | C <sub>21</sub> H <sub>42</sub> N <sub>5</sub> O <sub>10</sub> | 100.00 | 524.2926 | 0.8       | 1.4       | 27.5   | 3.5  | even           |      | ok     |
|           | 3 | C <sub>33</sub> H <sub>38</sub> N <sub>3</sub> O <sub>3</sub>  | 54.69  | 524.2908 | -1.1      | -2.1      | 43.4   | 16.5 | even           |      | ok     |

2-[4-(Dimethylamino)phenyl]-N-{4-[N-methyl-N-(tetrahydro-2H-pyran-4-yl)aminomethyl]phenyl}-6,7-dihydro-5H-benzo[7]annulene-8-carboxamide (**2f**)

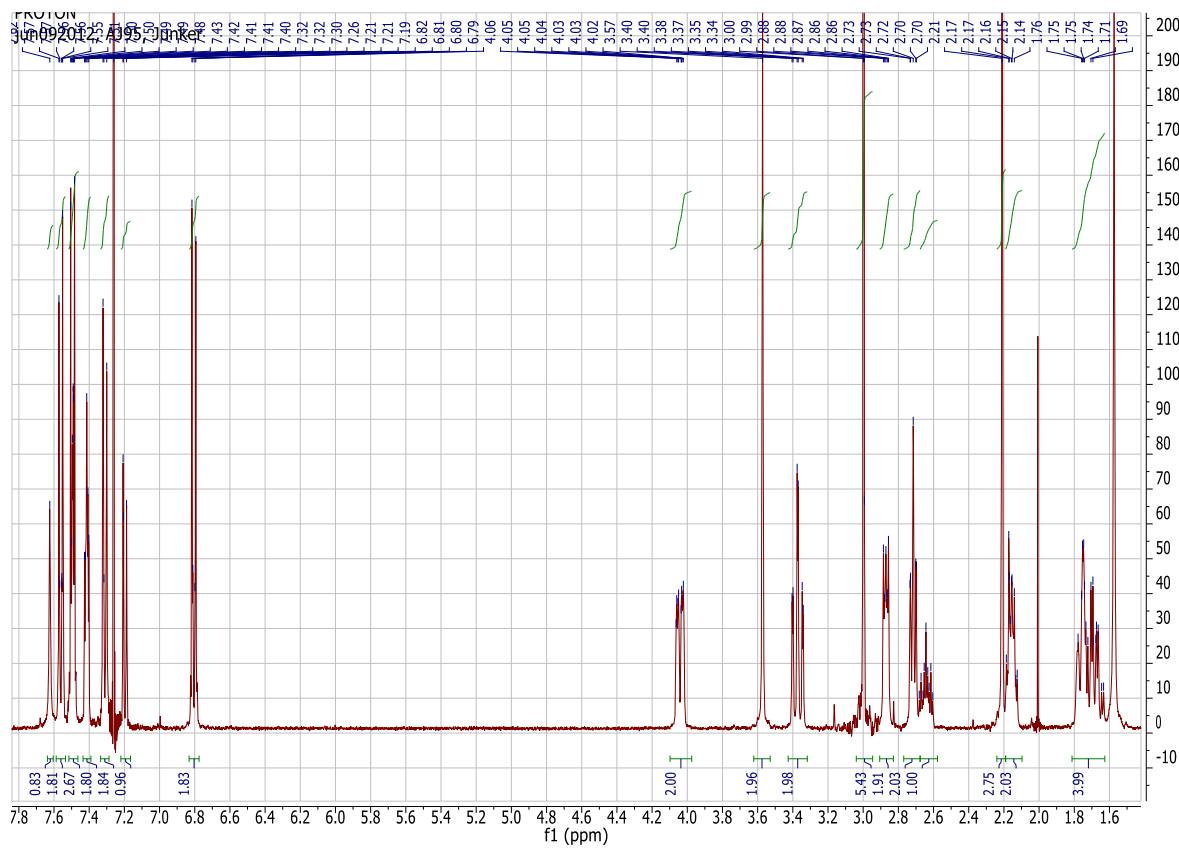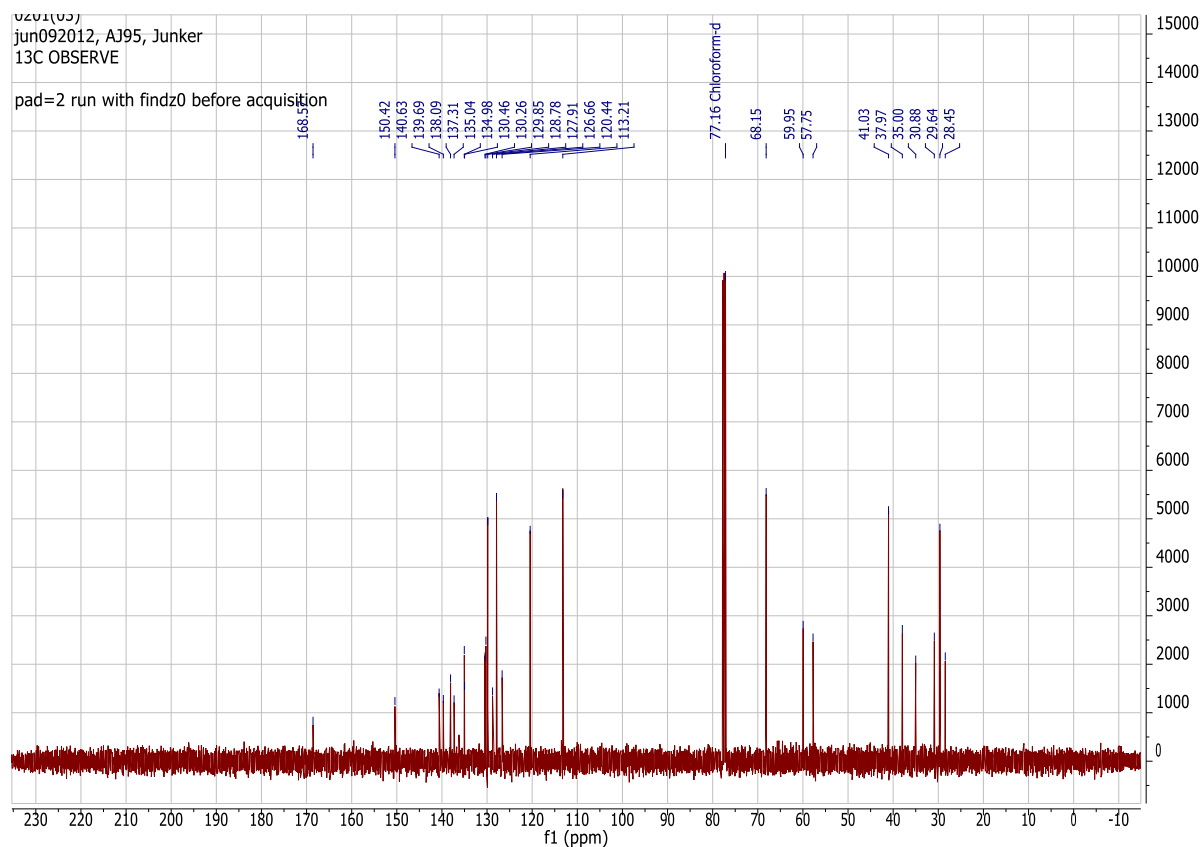

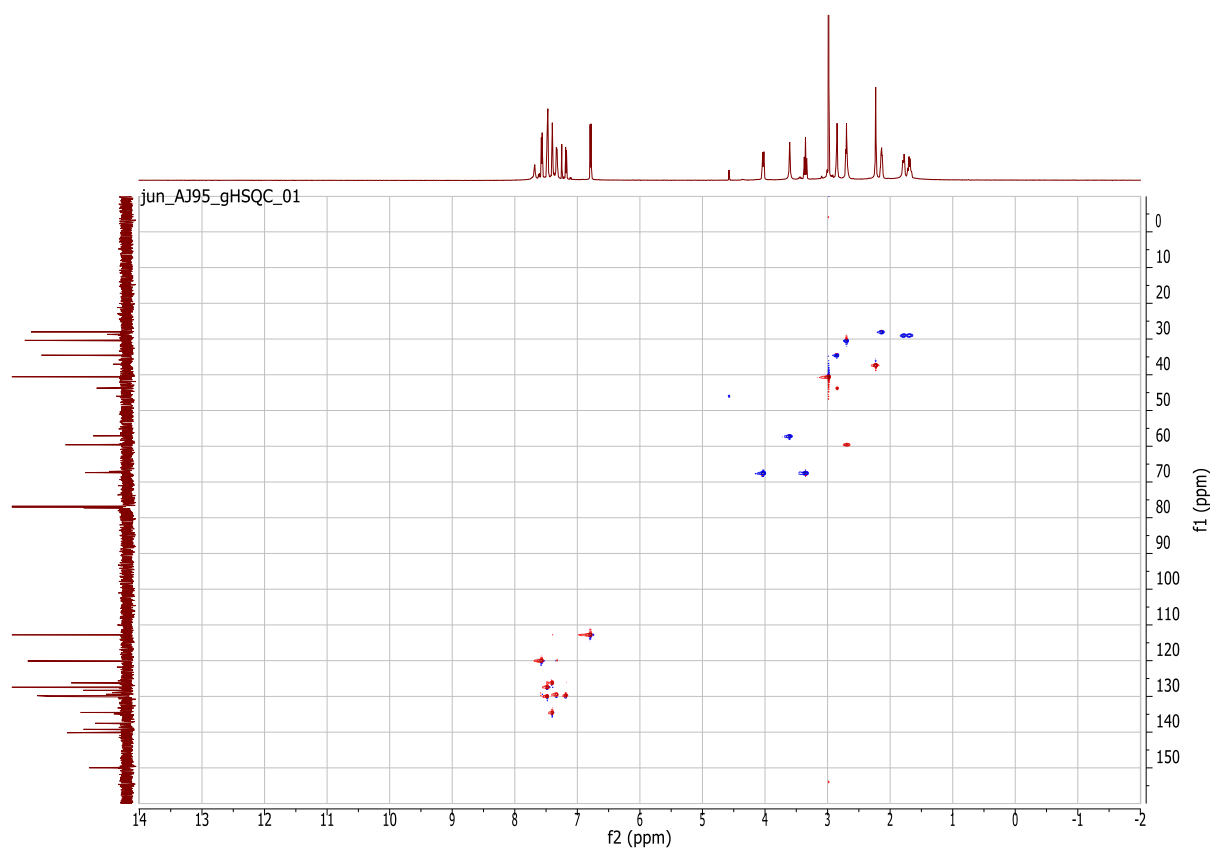

## HPLC

Analyzed: 20.09.12 02:50

Reported: 21.09.12 08:55

Processed: 21.09.12 08:55

Data Path: D:\WIN32APP\HSM\Chromni\DATA\5274\

Application: Chromni

Series: 5274

Sample Name: AJ95

Vial Number: 14

Injection from this vial: 1 of 1

Vial Type: UNK

Volume: 5,0 ul

Chrom Type: HPLC Channel : 1

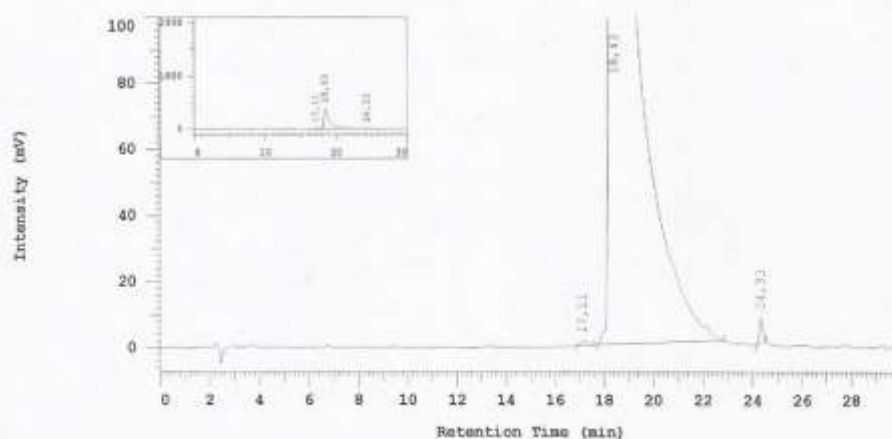

Acquisition Method: Chromni

Blank Subtr Sample Name: ACN

Column Type: 010

Solvent A: Wasser + 0,05%TFA

Developed by: Jens

Solvent B: ACN + 0,05%TFA

| No. | RT    | Area     | Conc 1  | BC |
|-----|-------|----------|---------|----|
| 1   | 17,11 | 27263    | 0,129   | BB |
| 2   | 18,43 | 21104094 | 99,540  | MC |
| 3   | 24,33 | 70181    | 0,331   | BB |
|     |       | 21201538 | 100,000 |    |

Peak rejection level: 0

## Generic Display Report

### Analysis Info

|               |                                                          |                  |                       |
|---------------|----------------------------------------------------------|------------------|-----------------------|
| Analysis Name | D:\Data\IPMC\PharmChemie\Routine\APCI\12_09\WJU_AJ95.d   | Acquisition Date | 9/20/2012 11:22:46 AM |
| Method        | APCI_directprobe_positiv.m                               | Operator         | Sendker               |
| Sample Name   | AJ95                                                     | Instrument       | micrOTOF-Q II         |
| Comment       | Junker<br>APCI-Direkt<br>Kalibration mit Fettsaureestern |                  |                       |

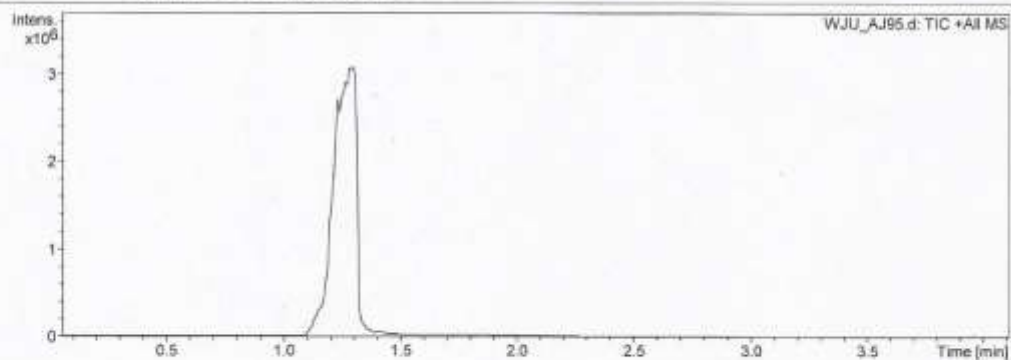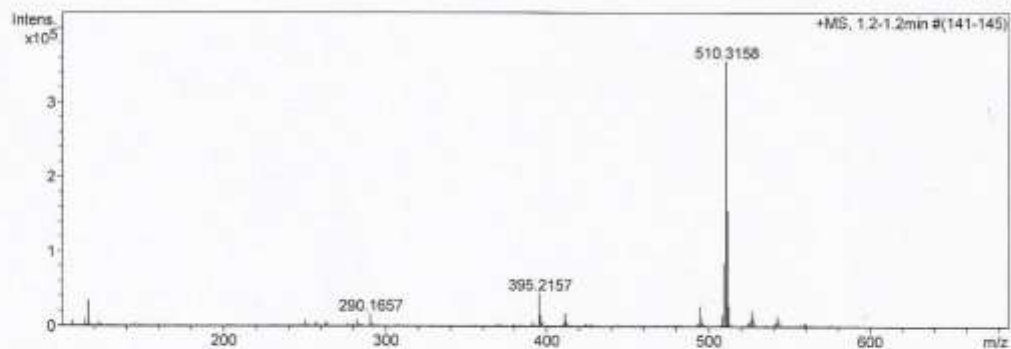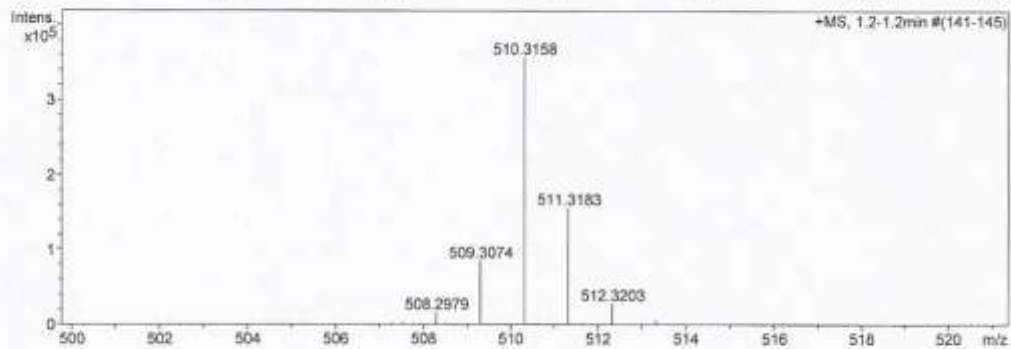



## Mass Spectrum SmartFormula Report

**Analysis Info**  
Analysis Name: D:\Data\PMC\PharmChemie\Routine\APC\12\_09\WJU\_AJ95.d  
Method: APCI\_directprobe\_positiv.m  
Sample Name: AJ95  
Comment: Junker  
APCI-Direkt  
Kalibration mit Fettsaureestern

Acquisition Date: 9/20/2012 11:22:46 AM  
Operator: Sendker  
Instrument / Ser#: micrOTOF-Q II 10252

### Acquisition Parameter

|             |            |                       |           |                  |           |
|-------------|------------|-----------------------|-----------|------------------|-----------|
| Source Type | APCI       | Ion Polarity          | Positive  | Set Nebulizer    | 0.7 Bar   |
| Focus       | Not active | Set Capillary         | 4000 V    | Set Dry Heater   | 200 °C    |
| Scan Begin  | 100 m/z    | Set End Plate Offset  | -500 V    | Set Dry Gas      | 3.0 l/min |
| Scan End    | 1000 m/z   | Set Collision Cell RF | 130.0 Vpp | Set Divert Valve | Waste     |

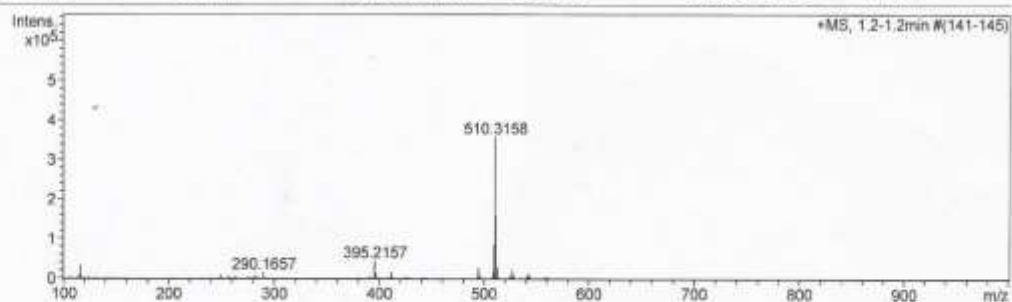

| Meas. m/z | # | Formula           | Score  | m/z      | err [mDa] | err [ppm] | mSigma | rdb  | e <sup>-</sup> Conf | N-Rule |
|-----------|---|-------------------|--------|----------|-----------|-----------|--------|------|---------------------|--------|
| 510.3158  | 1 | C 38 H 40 N       | 100.00 | 510.3155 | -0.3      | -0.6      | 9.8    | 19.5 | even                | ok     |
|           | 2 | C 33 H 40 N 3 O 2 | 2.13   | 510.3115 | -4.3      | -8.5      | 32.3   | 15.5 | even                | ok     |

*N*-{4-[*N*-Methyl-*N*-(tetrahydro-2*H*-pyran-4-yl)aminomethyl]phenyl}-2-(pyridin-3-yl)-6,7-dihydro-5*H*-benzo[7]annulene-8-carboxamide (**2g**)

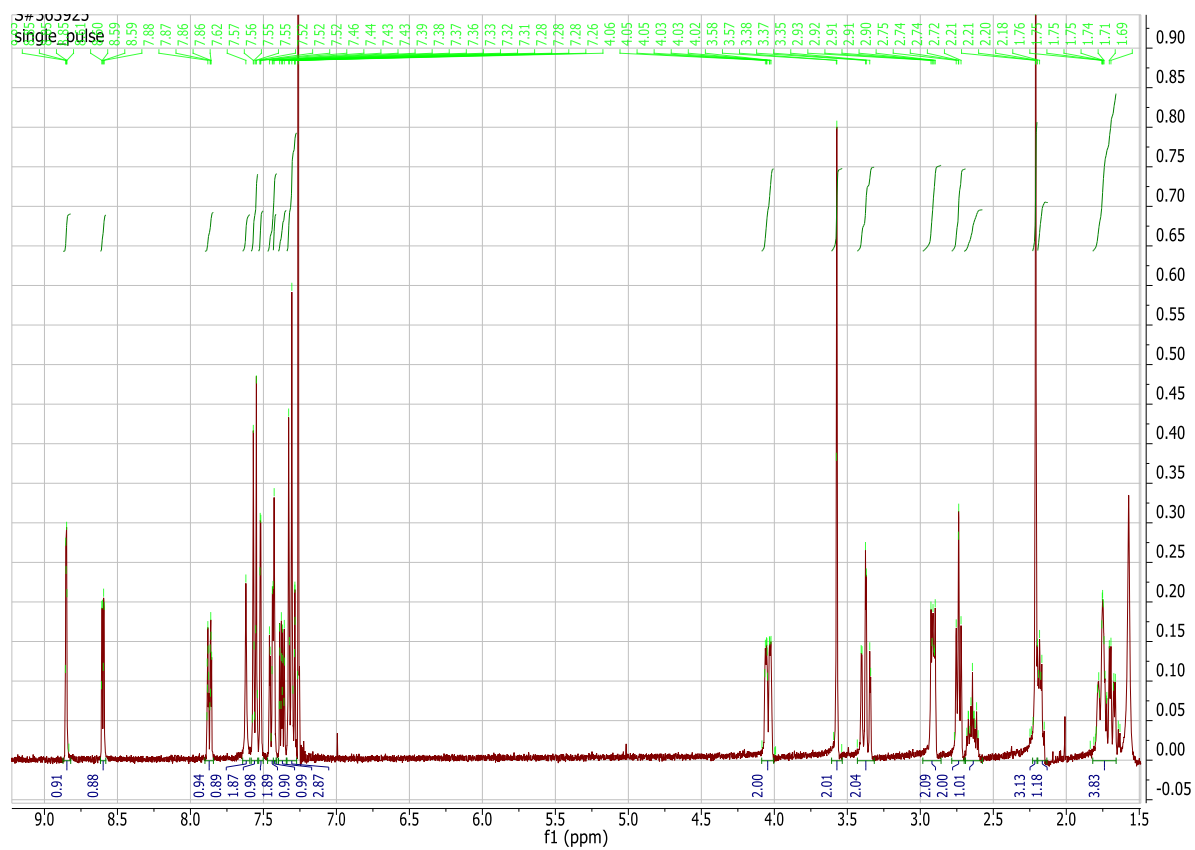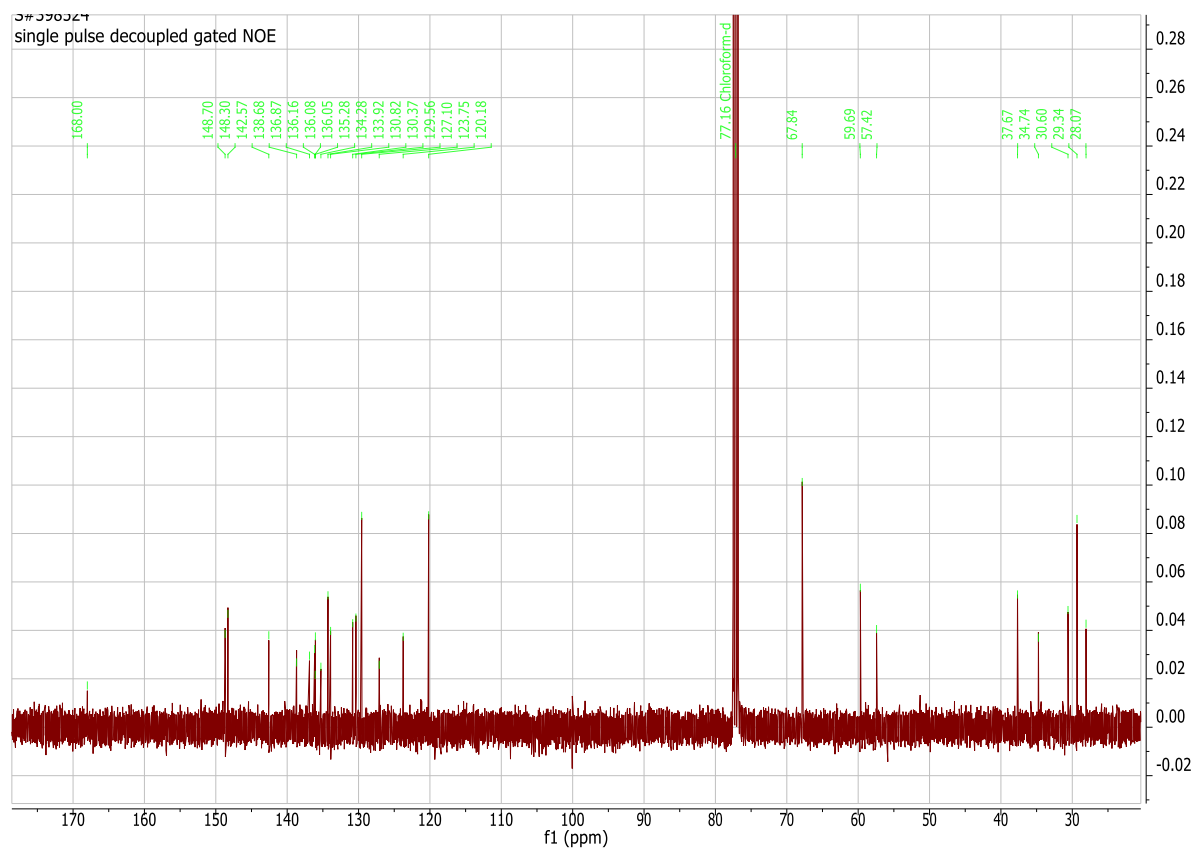

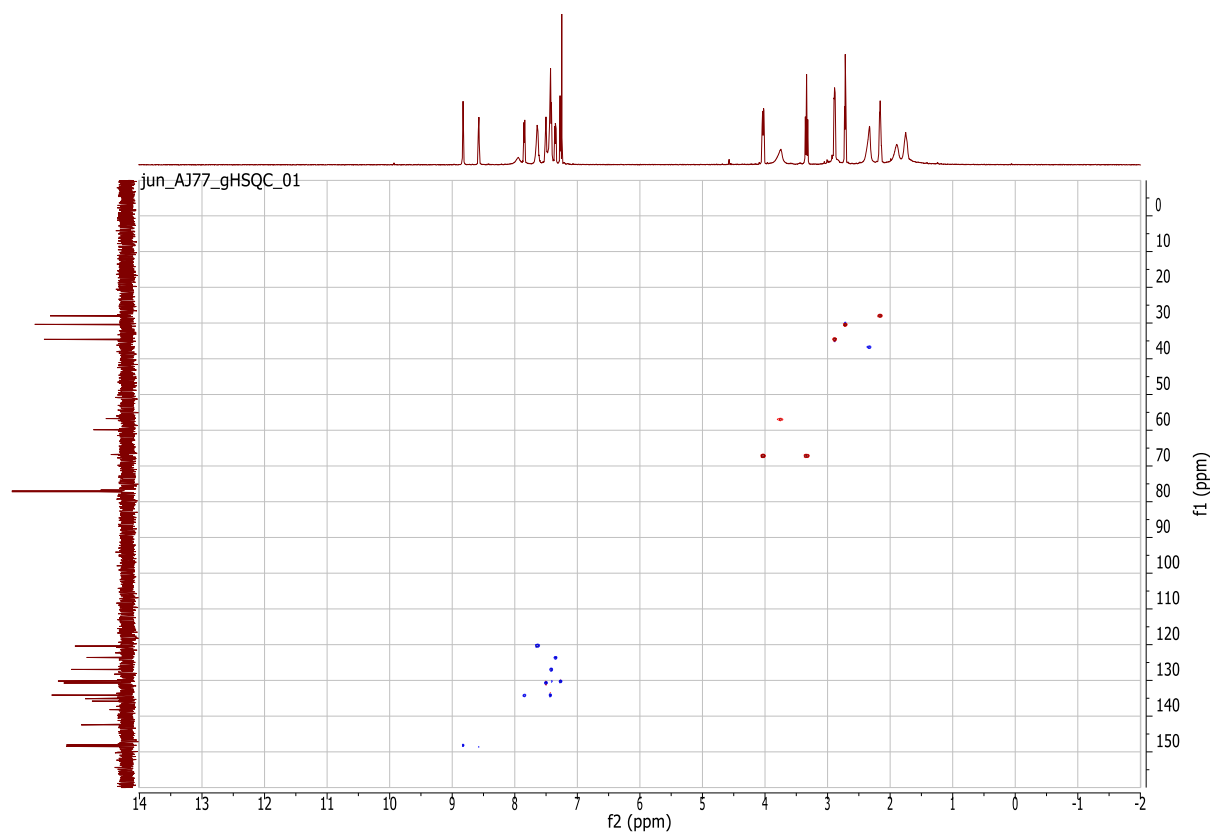

## HPLC

Analyzed: 05.07.12 05:25

Reported: 05.07.12 15:49  
Processed: 05.07.12 15:48

Data Path: D:\WIN32APP\HSM\Chromni\DATA\4974\

Application: Chromni

Series:4974

**Sample Name: AJ7701**

Vial Number: 15

Injection from this vial: 1 of 1

Vial Type: UNK

Volume: 5,0 ul

Chrom Type: HPLC Channel : 1

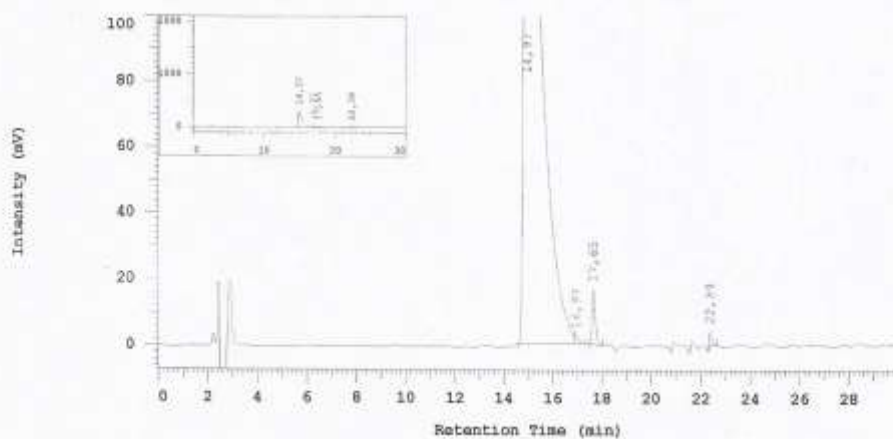

Acquisition Method: Chromni

Blank Subtr Sample Name: ACN

Column Type: 010

Solvent A: Wasser + 0,05%TFA

Developed by: Jens

Solvent B: ACN + 0,05%TFA

| No. | RT    | Area     | Conc 1  | BC |
|-----|-------|----------|---------|----|
| 1   | 14,97 | 11287230 | 98,134  | MC |
| 2   | 16,97 | 31255    | 0,272   | MC |
| 3   | 17,65 | 148383   | 1,290   | MC |
| 4   | 22,39 | 34939    | 0,304   | MC |
|     |       | 11501807 | 100,000 |    |

Peak rejection level: 0

## Generic Display Report

|                      |                                                           |                  |                      |
|----------------------|-----------------------------------------------------------|------------------|----------------------|
| <b>Analysis Info</b> |                                                           | Acquisition Date | 8/2/2012 10:50:34 AM |
| Analysis Name        | D:\Data\PMCI\Pharm\Chemie\Routine\APCI\12_08\WJU_AJ7701.d | Operator         | Meiners              |
| Method               | APCI_directprobe_positiv.m                                | Instrument       | micrOTOF-Q II        |
| Sample Name          | AJ7701                                                    |                  |                      |
| Comment              | Junker<br>APCI-Direkt<br>Kalibration mit Fettsaureestern  |                  |                      |

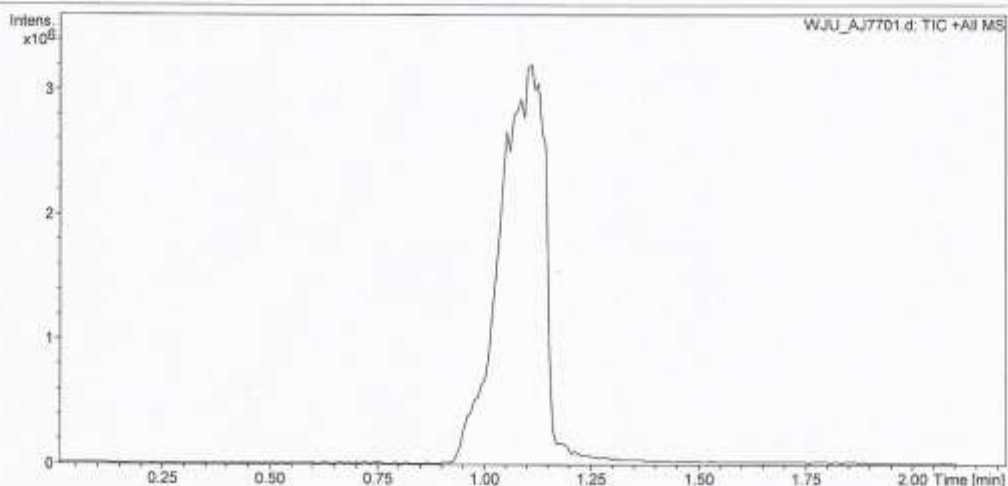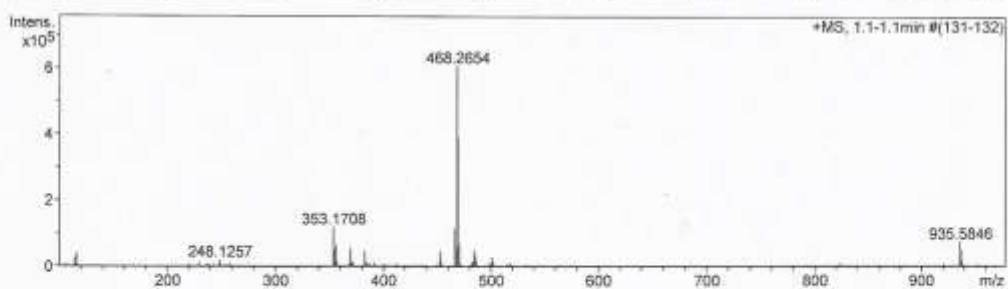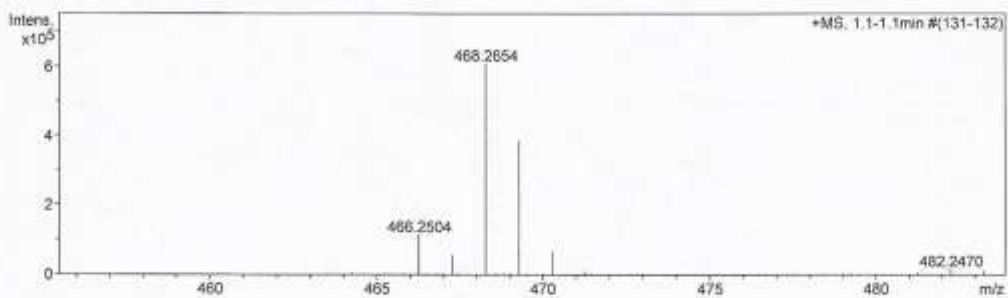

## Mass Spectrum SmartFormula Report

|                      |                                                           |                   |                      |
|----------------------|-----------------------------------------------------------|-------------------|----------------------|
| <b>Analysis Info</b> |                                                           | Acquisition Date  | 8/2/2012 10:50:34 AM |
| Analysis Name        | D:\Data\PMC\PharmChemie\Routine\APCI\12_08\WJU_AJ7701.d   | Operator          | Meiners              |
| Method               | APCI_directprobe_positiv.m                                | Instrument / Ser# | microTOF-Q II 10252  |
| Sample Name          | AJ7701                                                    |                   |                      |
| Comment              | Junker<br>APCI-Direkt<br>Kalibration mit Fettsaeureestern |                   |                      |

### Acquisition Parameter

|             |            |                       |           |                  |           |
|-------------|------------|-----------------------|-----------|------------------|-----------|
| Source Type | APCI       | Ion Polarity          | Positive  | Set Nebulizer    | 0.7 Bar   |
| Focus       | Not active | Set Capillary         | 4000 V    | Set Dry Heater   | 200 °C    |
| Scan Begin  | 100 m/z    | Set End Plate Offset  | -500 V    | Set Dry Gas      | 3.0 l/min |
| Scan End    | 1000 m/z   | Set Collision Cell RF | 130.0 Vpp | Set Divert Valve | Waste     |

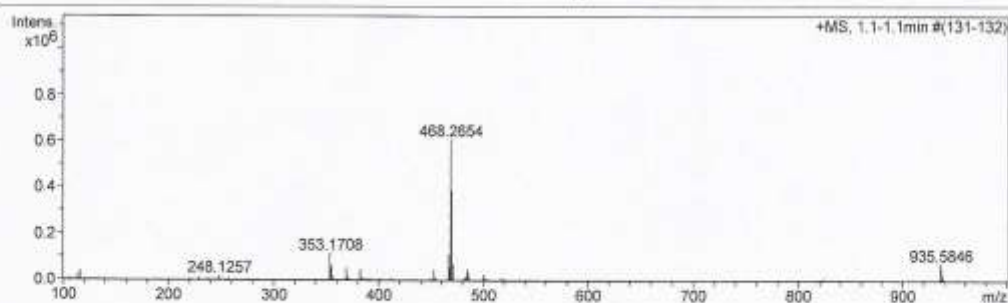

| Meas. m/z | # | Formula            | Score  | m/z      | err [mDa] | err [ppm] | mSigma | rdB  | e <sup>-</sup> Conf | N-Rule |
|-----------|---|--------------------|--------|----------|-----------|-----------|--------|------|---------------------|--------|
| 468.2654  | 1 | C 35 H 34 N        | 67.67  | 468.2686 | 3.2       | 6.9       | 126.2  | 19.5 | even                | ok     |
|           | 2 | C 30 H 34 N 3 O 2  | 100.00 | 468.2846 | -0.8      | -1.7      | 150.3  | 15.5 | even                | ok     |
|           | 3 | C 26 H 30 N 9      | 0.70   | 468.2619 | -3.5      | -7.4      | 189.0  | 16.5 | even                | ok     |
|           | 4 | C 18 H 38 N 5 O 9  | 0.73   | 468.2864 | 1.1       | 2.2       | 212.0  | 2.5  | even                | ok     |
|           | 5 | C 20 H 30 N 13 O   | 0.04   | 468.2691 | 3.7       | 8.0       | 219.0  | 12.5 | even                | ok     |
|           | 6 | C 19 H 34 N 9 O 5  | 0.05   | 468.2677 | 2.4       | 5.1       | 230.7  | 7.5  | even                | ok     |
|           | 7 | C 15 H 30 N 15 O 3 | 0.04   | 468.2651 | -0.3      | -0.6      | 246.0  | 6.5  | even                | ok     |
|           | 8 | C 14 H 34 N 11 O 7 | 0.01   | 468.2637 | -1.8      | -3.5      | 257.9  | 3.5  | even                | ok     |
|           | 9 | C 11 H 26 N 21 O   | 0.00   | 468.2624 | -3.0      | -6.4      | 259.3  | 9.5  | even                | ok     |

*N*-{4-[Methyl(tetrahydro-2H-pyran-4-yl)aminomethyl]phenyl}-2-(5-methylthiophen-2-yl)-6,7-dihydro-5H-benzo[7]annulene-8-carboxamide (**2h**)

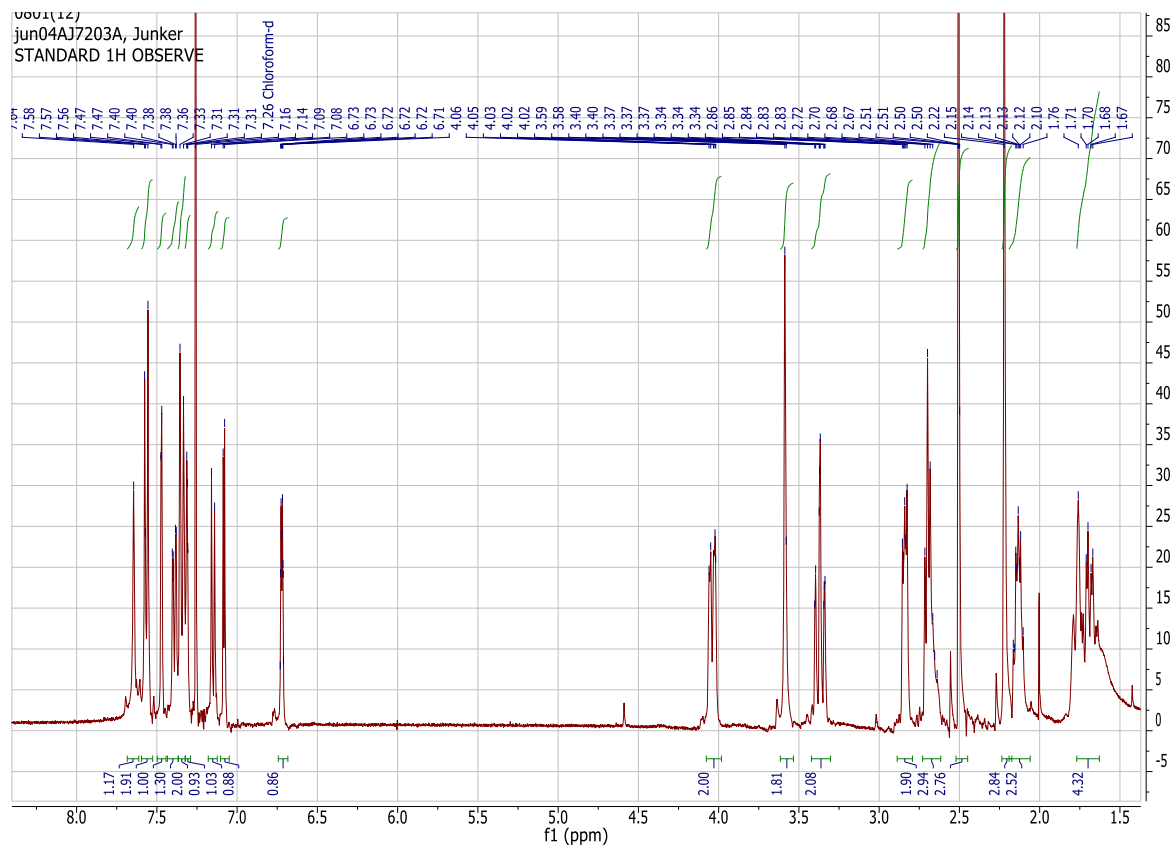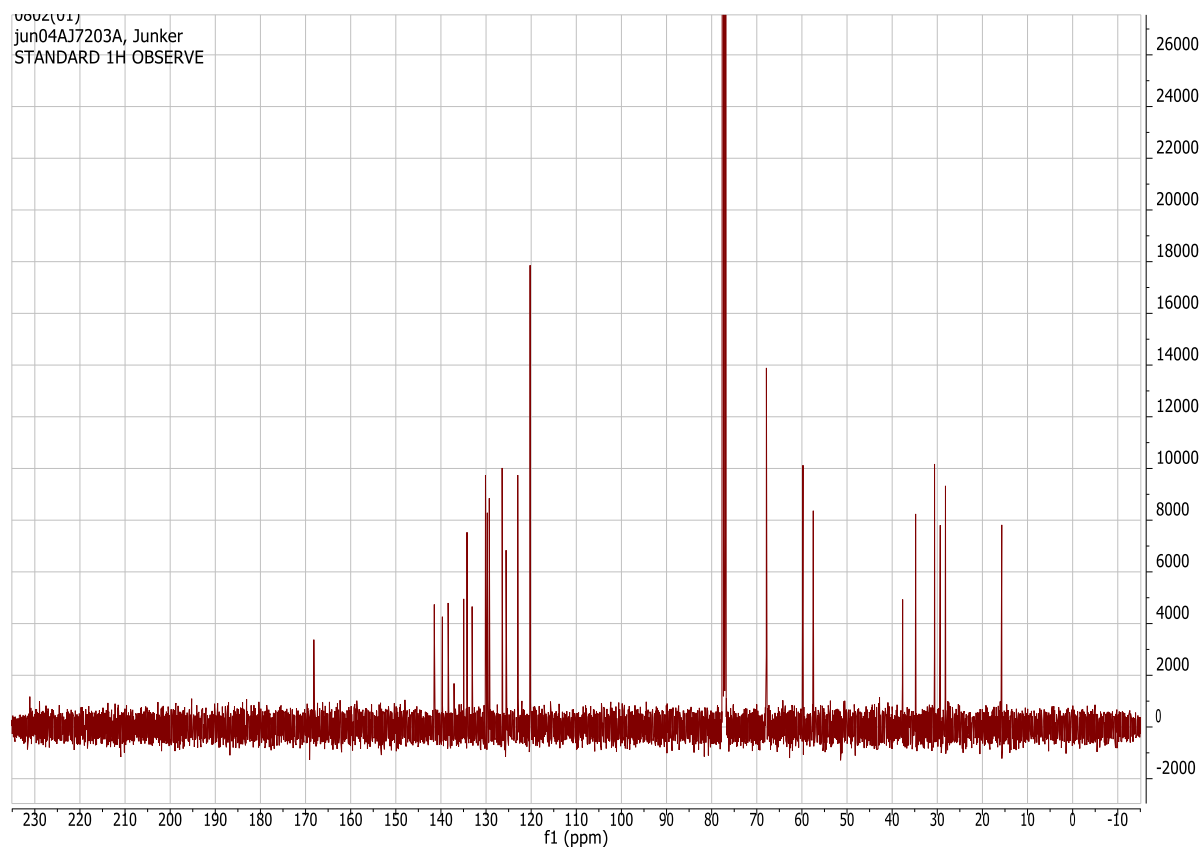

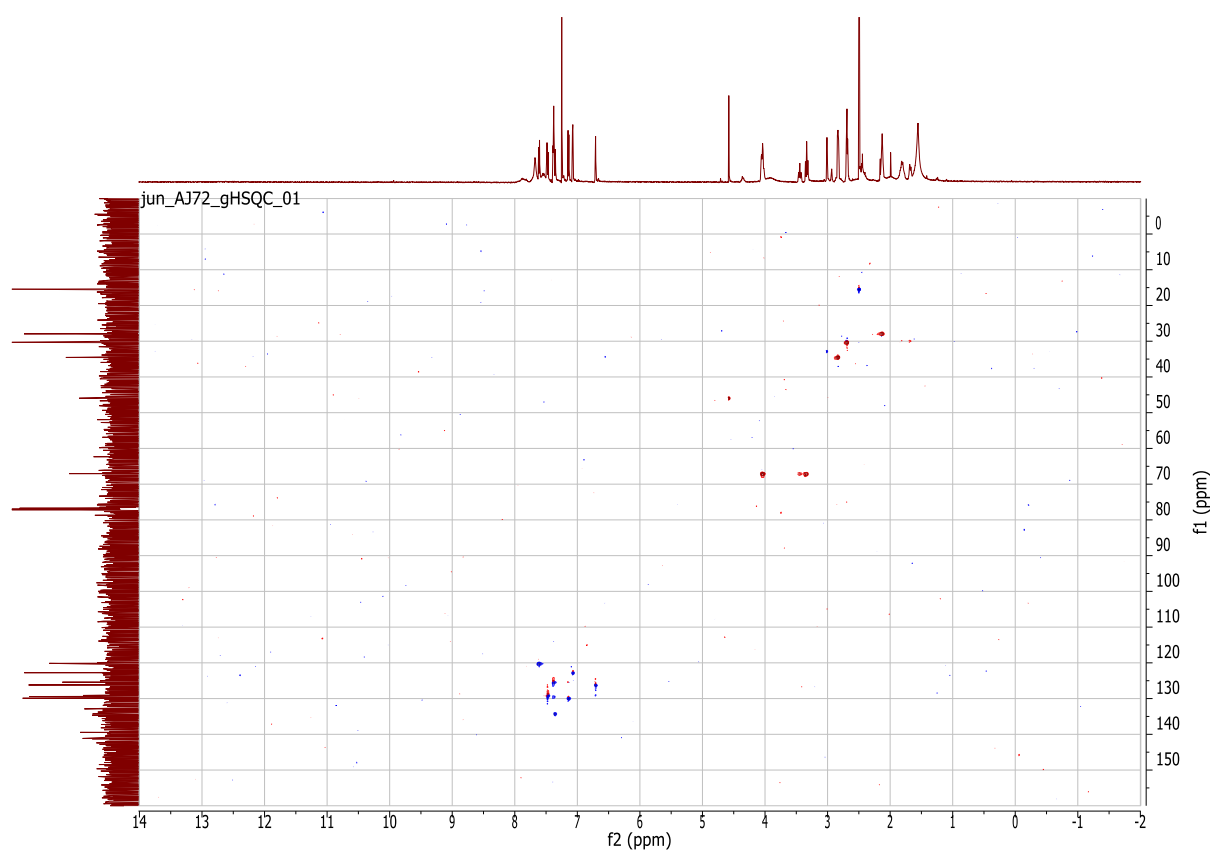



## HPLC

Analyzed: 20.04.11 05:17

Reported: 20.04.11 14:17

Processed: 20.04.11 14:17

Data Path: D:\WIN32APP\HSM\Chromni\DATA\2995\

Application: Chromni

Series:2995

**Sample Name: AJ7203B**

Vial Number: 14

Injection from this vial: 1 of 1

Vial Type: UNK

Volume: 5,0 ul

Chrom Type: HPLC Channel : 1

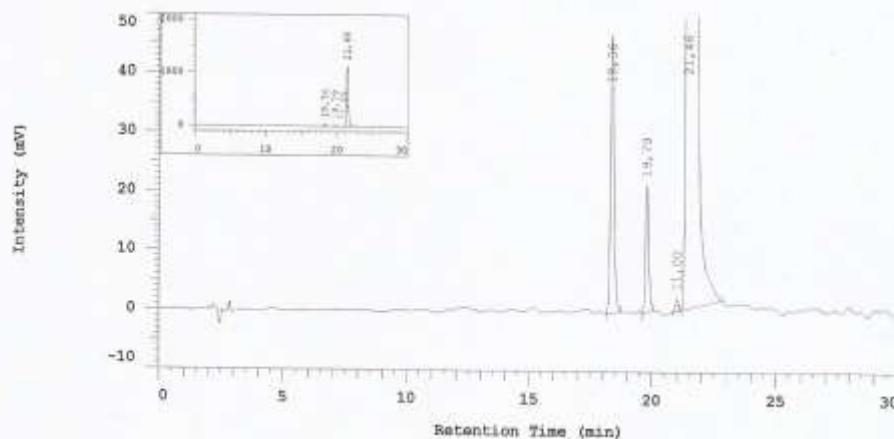

Acquisition Method: Chromni

Blank Subtr Sample Name: ACN

Column Type: 010

Solvent A: Wasser + 0,05%TFA

Developed by: Jens

Solvent B: ACN + 0,05%TFA

| No. | RT    | Area     | Conc 1  | BC |
|-----|-------|----------|---------|----|
| 1   | 18,36 | 444850   | 2,625   | MC |
| 2   | 19,79 | 191792   | 1,132   | BB |
| 3   | 21,00 | 13310    | 0,079   | BB |
| 4   | 21,46 | 16294235 | 96,164  | MC |
|     |       | 16944187 | 100,000 |    |

Peak rejection level: 0

## Generic Display Report

### Analysis Info

Analysis Name D:\Data\IPMC\PharmChemie\Routine\2011\_5\WJU\_AJ7203.d  
Method APCI\_directprobe\_default.m  
Sample Name AJ7203  
Comment Junker  
APCI-Direkt  
Kalibration mit Fettsaeureestern

Acquisition Date 5/2/2011 2:38:46 PM

Operator Meiners

Instrument micrOTOF-Q II

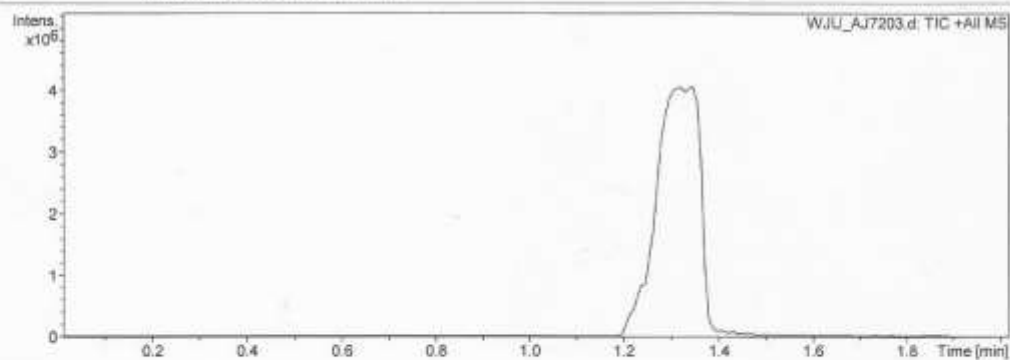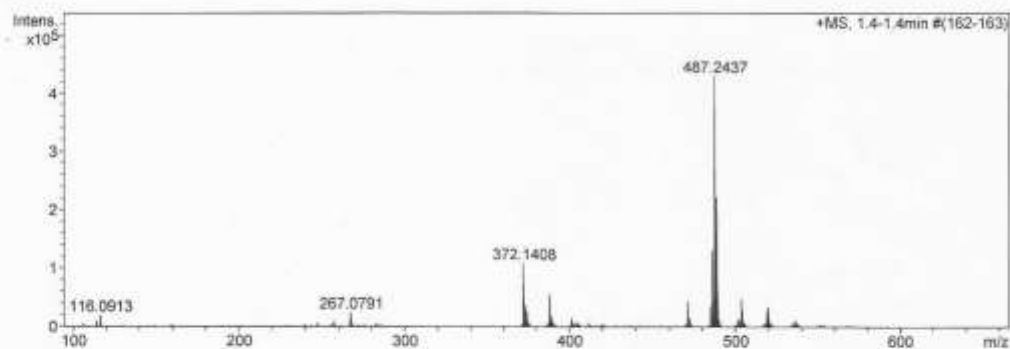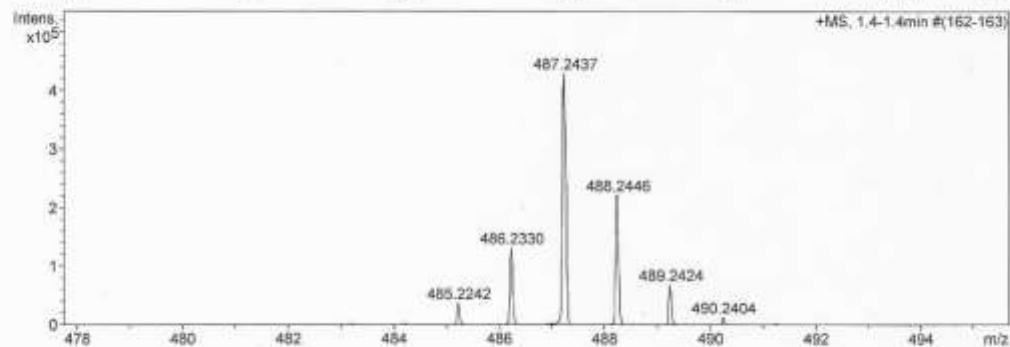

## Mass Spectrum SmartFormula Report

### Analysis Info

Analysis Name D:\Data\IPMC\PharmChemie\Routine\2011\_5WJU\_AJ7203.d  
 Method APCI\_directprobe\_default.m  
 Sample Name AJ7203  
 Comment Junker  
 APCI-Direkt  
 Kalibration mit Fettsaeureestern

Acquisition Date 5/2/2011 2:38:46 PM

Operator Meiners  
 Instrument / Ser# micrOTOF-Q II 10252

### Acquisition Parameter

|             |            |                       |           |                  |           |
|-------------|------------|-----------------------|-----------|------------------|-----------|
| Source Type | APCI       | Ion Polarity          | Positive  | Set Nebulizer    | 0.7 Bar   |
| Focus       | Not active | Set Capillary         | 4000 V    | Set Dry Heater   | 200 °C    |
| Scan Begin  | 100 m/z    | Set End Plate Offset  | -500 V    | Set Dry Gas      | 3.0 l/min |
| Scan End    | 1000 m/z   | Set Collision Cell RF | 130.0 Vpp | Set Divert Valve | Waste     |

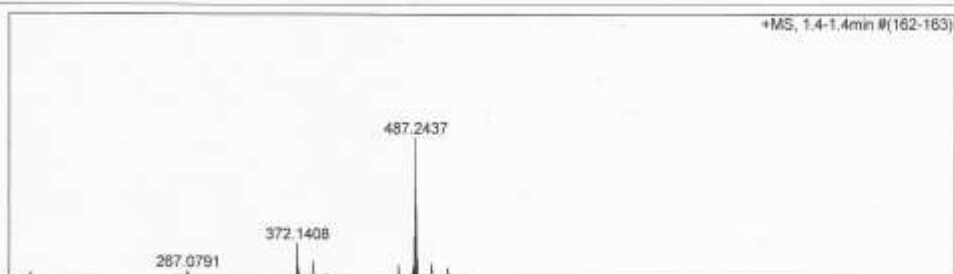

| Meas. m/z | #  | Formula                                                                       | Score  | m/z      | err [mDa] | err [ppm] | mSigma | rdb  | e <sup>-</sup> Conf | N-Rule |
|-----------|----|-------------------------------------------------------------------------------|--------|----------|-----------|-----------|--------|------|---------------------|--------|
| 487.2437  | 1  | C <sub>35</sub> H <sub>35</sub> S                                             | 100.00 | 487.2454 | 1.7       | -3.6      | 65.6   | 18.5 | even                | ok     |
|           | 2  | C <sub>27</sub> H <sub>39</sub> N <sub>2</sub> O <sub>2</sub> S <sub>2</sub>  | 63.69  | 487.2447 | 1.1       | 2.2       | 88.0   | 9.5  | even                | ok     |
|           | 3  | C <sub>30</sub> H <sub>35</sub> N <sub>2</sub> O <sub>2</sub> S               | 25.11  | 487.2414 | -2.3      | -4.7      | 90.1   | 14.5 | even                | ok     |
|           | 4  | C <sub>20</sub> H <sub>39</sub> N <sub>8</sub> S <sub>3</sub>                 | 15.77  | 487.2454 | 1.8       | 3.6       | 108.3  | 5.5  | even                | ok     |
|           | 5  | C <sub>23</sub> H <sub>35</sub> N <sub>8</sub> S <sub>2</sub>                 | 16.62  | 487.2421 | -1.6      | -3.3      | 109.6  | 10.5 | even                | ok     |
|           | 6  | C <sub>22</sub> H <sub>47</sub> O <sub>3</sub> S <sub>4</sub>                 | 3.08   | 487.2403 | -3.4      | -7.0      | 112.0  | -0.5 | even                | ok     |
|           | 7  | C <sub>19</sub> H <sub>43</sub> N <sub>4</sub> O <sub>4</sub> S <sub>3</sub>  | 19.26  | 487.2441 | 0.4       | 0.9       | 119.5  | 0.5  | even                | ok     |
|           | 8  | C <sub>22</sub> H <sub>39</sub> N <sub>4</sub> O <sub>4</sub> S <sub>2</sub>  | 2.88   | 487.2407 | -2.9      | -6.0      | 122.0  | 5.5  | even                | ok     |
|           | 9  | C <sub>23</sub> H <sub>39</sub> N <sub>2</sub> O <sub>7</sub> S               | 1.05   | 487.2472 | 3.6       | 7.4       | 128.1  | 5.5  | even                | ok     |
|           | 10 | C <sub>20</sub> H <sub>31</sub> N <sub>12</sub> O <sub>5</sub>                | 3.70   | 487.2459 | 2.2       | 4.6       | 128.4  | 11.5 | even                | ok     |
|           | 11 | C <sub>15</sub> H <sub>39</sub> N <sub>10</sub> O <sub>2</sub> S <sub>3</sub> | 3.56   | 487.2414 | -2.3      | -4.6      | 129.0  | 1.5  | even                | ok     |
|           | 12 | C <sub>19</sub> H <sub>35</sub> N <sub>8</sub> O <sub>5</sub> S               | 4.66   | 487.2446 | 0.9       | 1.9       | 139.8  | 6.5  | even                | ok     |
|           | 13 | C <sub>15</sub> H <sub>31</sub> N <sub>14</sub> O <sub>3</sub> S              | 1.26   | 487.2419 | -1.8      | -3.7      | 151.6  | 7.5  | even                | ok     |
|           | 14 | C <sub>18</sub> H <sub>39</sub> N <sub>4</sub> O <sub>9</sub> S               | 2.78   | 487.2432 | -0.4      | -0.9      | 151.6  | 1.5  | even                | ok     |
|           | 15 | C <sub>12</sub> H <sub>35</sub> N <sub>14</sub> O <sub>3</sub> S <sub>2</sub> | 0.87   | 487.2452 | 1.6       | 3.3       | 158.9  | 2.5  | even                | ok     |
|           | 16 | C <sub>14</sub> H <sub>35</sub> N <sub>10</sub> O <sub>7</sub> S              | 0.18   | 487.2405 | -3.1      | -6.4      | 163.2  | 2.5  | even                | ok     |
